# Supplementary material for: Have restricted working hours reduced junior doctors’ experience of fatigue? A focus group and telephone interview study
Source: PubMed Central journal article supplement — BMJ Open. 2014 Mar 6;4(3):e004222. doi: 10.1136/bmjopen-2013-004222 (PMC3948452; doi:10.1136/bmjopen-2013-004222), 2014-03-06
Supplement: bmjopen-2013-004222.draft_revisions.pdf [file bmjopen-2013-004222.draft_revisions.pdf]

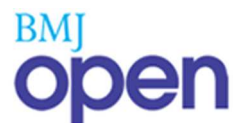

**Have restricted working hours reduced junior doctors' experience of fatigue? A qualitative study**

|                                    |                                                                                                                                                                                                                                                                                                                               |
|------------------------------------|-------------------------------------------------------------------------------------------------------------------------------------------------------------------------------------------------------------------------------------------------------------------------------------------------------------------------------|
| Journal:                           | <i>BMJ Open</i>                                                                                                                                                                                                                                                                                                               |
| Manuscript ID:                     | bmjopen-2013-004222                                                                                                                                                                                                                                                                                                           |
| Article Type:                      | Research                                                                                                                                                                                                                                                                                                                      |
| Date Submitted by the Author:      | 10-Oct-2013                                                                                                                                                                                                                                                                                                                   |
| Complete List of Authors:          | Morrow, Gill; Durham University, Centre for Medical Education Research<br>Burford, Bryan; Newcastle University, School of Medical Sciences Education<br>Development<br>Carter, Madeline; Durham University, Centre for Medical Education<br>Research<br>Illing, Jan; Durham University, Centre for Medical Education Research |
| <b>Primary Subject<br>Heading</b>: | Medical education and training                                                                                                                                                                                                                                                                                                |
| Secondary Subject Heading:         | Qualitative research                                                                                                                                                                                                                                                                                                          |
| Keywords:                          | FATIGUE, WORKING TIME REGULATIONS, JUNIOR DOCTORS, WORKING<br>HOURS RESTRICTIONS, DOCTORS IN TRAINING                                                                                                                                                                                                                         |
|                                    |                                                                                                                                                                                                                                                                                                                               |

SCHOLARONE™  
Manuscripts

1  
2  
3  
4 **Have restricted working hours reduced junior doctors' experience of fatigue? A**  
5  
6 **qualitative study**  
7

8  
9  
10 Gill Morrow

11 Senior Research Associate

12 Centre for Medical Education Research

13 Durham University

14 Burdon House

15 Leazes Road

16 Durham

17 DH1 1TA

18  
19  
20  
21  
22  
23  
24  
25  
26  
27  
28 Bryan Burford

29 Lecturer in Medical Education

30 School of Medical Sciences Education Development

31 The Medical School

32 Ridley Building 1

33 Newcastle University

34 Newcastle upon Tyne

35 NE1 7RU

36  
37  
38  
39  
40  
41  
42  
43  
44  
45  
46 Madeline Carter

47 Research Fellow

48 Centre for Medical Education Research

49 Durham University

50 Burdon House

51 Leazes Road

1  
2  
3 Durham

4  
5 DH1 1TA

6  
7  
8  
9 Jan Illing

10  
11 Professor in Medical Education

12  
13 Centre for Medical Education Research

14  
15 Durham University

16  
17 Burdon House

18  
19 Leazes Road

20  
21 Durham

22  
23 DH1 1TA

**ABSTRACT**

**Objectives:** To explore the effects of the UK Working Time Regulations (WTR) on trainee doctors' experience of fatigue.

**Design:** Qualitative research

**Setting:** Nine deaneries in all four nations of the UK; secondary care

**Participants:** Focus groups or telephone interviews were conducted with trainee doctors purposively selected from Foundation Years One and Two and specialty training in the nine deaneries. 82 junior doctors participated: 53 Foundation Programme trainees (40 in Foundation Year 1, 13 in Foundation Year 2) and 29 specialty trainees. Thirty-six participants were male and 46 were female. Specialty trainee participants were training in a wide range of medical and surgical specialties, and psychiatry.

**Findings:** The implementation of the WTR, whilst acknowledged to be an improvement to the earlier situation of prolonged excessive hours, has not wholly overcome experience of long working hours and fatigue. Fatigue did not just arise from hours specified in rota design. Trainees worked beyond their rostered hours for a number of reasons, including some voluntary, and other organisational, professional, cultural and contextual reasons. Fatigue was perceived to affect efficiency of skills and judgement, mood, and learning capacity.

**Conclusions:** The long term risks of this continued stress and fatigue, for the doctors themselves and for the effective delivery of a healthcare service, should not be ignored. Current monitoring and quality management processes may need to be reviewed to increase their sensitivity to issues regarding rotas and hours worked. Effects on fatigue and on education cannot be isolated from other contextual factors, including workforce issues. On-going attention needs to be paid to broader cultural issues, for example in relation to trainees' professional autonomy and the relationship between trainees and their seniors.

1  
2  
3  
4  
5  
6  
7  
8  
9  
10  
11  
12  
13  
14  
15  
16  
17  
18  
19  
20  
21  
22  
23  
24  
25  
26  
27  
28  
29  
30  
31  
32  
33  
34  
35  
36  
37  
38  
39  
40  
41  
42  
43  
44  
45  
46  
47  
48  
49  
50  
51  
52  
53  
54  
55  
56  
57  
58  
59  
60

For peer review only

## ARTICLE SUMMARY

### Article focus

The aim of the paper is to explore the effects of the UK Working Time Regulations (WTR) on trainee doctors' experience of fatigue.

### Key messages

- The implementation of the WTR, whilst acknowledged to be an improvement to the earlier situation of prolonged excessive hours, has not wholly overcome experience of long working hours and fatigue. Current monitoring and quality management processes may need to be reviewed to increase their sensitivity to issues regarding rotas and hours worked.
- Effects on fatigue and on education cannot be isolated from other contextual factors, including workforce issues.
- On-going attention needs to be paid to broader cultural issues identified in relation to trainees' professional autonomy and the relationship between trainees and their seniors.

### Strengths and limitations

- The strength of the study is the breadth of trainee participants, covering a range of training grades and specialties and all four nations of the UK.
- A potential weakness is that participants were volunteers to the study, and as such may be open to self-selection bias. However, this risk is mitigated by the instance of one group run as part of Foundation Programme teaching, where all but four of a cohort of F1s were able to attend. That group identified the same issues as the wider sample, suggesting the prevalence of the issues identified is not limited to a particularly engaged sample.

1  
2  
3 **Title: Have restricted working hours reduced junior doctors' experience of fatigue? A**  
4 **qualitative study**  
5  
6

7  
8 **Introduction**  
9

10  
11  
12 There is a considerable body of evidence recognising that fatigue has adverse physiological,  
13 psychological and cognitive effects and can lead to deficits in performance and safety.<sup>1</sup>

14  
15 Fatigue in doctors is associated with increases of risks to personal safety at work<sup>2,3</sup> and  
16 outside work,<sup>4,5</sup> and risks to health and wellbeing.<sup>6-9</sup> There is also evidence of detriments to  
17 performance, for example in cognitive abilities<sup>10,11</sup> and psychomotor skills,<sup>12-14</sup> (although  
18 some studies have found no performance effects<sup>15,16</sup>). Fatigue has also been associated  
19 directly with negative consequences for patient safety such as clinical errors and diagnostic  
20 mistakes.<sup>4,5,17-20</sup> This has been a concern in medicine for several years<sup>21</sup> and remains so  
21 today.<sup>22,23</sup> The effects may be compounded by a risk that doctors do not recognise that they  
22 may be subject to adverse effects.<sup>23</sup>  
23  
24  
25  
26  
27  
28  
29  
30  
31  
32

33  
34 Several countries have introduced limits on working hours. For example, in the USA, since  
35 2003, there has been national implementation of an Accreditation Council for Graduate  
36 Medical Education (ACGME) 80-hour resident work week restriction, averaged over four  
37 weeks; however the limit is lower in Europe. The European Working Time Directive (EWTD)  
38 was introduced to limit hours, to address health and safety concerns for all workers arising  
39 from long hours. Each European Union member state implemented the Directive in its own  
40 legislation – the UK as the Working Time Regulations (1998). These Regulations (the WTR)  
41 have applied fully to junior doctors since 2009, with a limit of 48 hours per week, averaged  
42 across a reference period of 26 weeks, alongside specified minimum rest periods. The WTR  
43 are implemented in rotas alongside the New Deal, which specifies a maximum of 56 hours  
44 per week, with a system of banded payments.  
45  
46  
47  
48  
49  
50  
51  
52  
53  
54  
55  
56  
57  
58  
59  
60

1  
2  
3 Positive effects of a reduction in working hours have been found in many studies,<sup>24-26</sup> but not  
4 all.<sup>27 28</sup> The effect varies with the precise implementation of restrictions, with fatigue affected  
5 by work patterns including the number of consecutive days or nights worked, the intervals  
6 between shifts, and the timing of shifts (day/evening/night).<sup>29-31</sup> Short naps may ameliorate  
7 the negative effects of fatigue,<sup>32</sup> and awareness of the benefits of naps and other  
8 recommendations and interventions to limit fatigue associated with rotating shift work may  
9 be needed.<sup>33</sup>

10  
11  
12  
13  
14  
15  
16  
17  
18 Organisational cultures of long or antisocial hours<sup>34</sup> may also be a factor impacting on stress  
19 and fatigue, and trainees have reported being unofficially expected to work extra hours  
20 voluntarily.<sup>35</sup> Furthermore workload pressures and poor work design may increase risks of  
21 negative behaviours among staff.<sup>36</sup> Limits on professional autonomy – the amount of control  
22 doctors have traditionally held over their practice – may also increase doctors' stress and  
23 reduce job satisfaction.<sup>37-39</sup>

24  
25  
26  
27  
28  
29  
30  
31  
32 Consequently, simply restricting the number of work hours may be insufficient to address  
33 issues relating to fatigue and its consequences. With this in mind, the question is raised  
34 whether the WTR will have achieved the aim of improving junior doctors' wellbeing and  
35 fatigue. To date, there has been little research looking directly at the effects of the WTR as  
36 implemented and experienced in practice. This paper draws on a larger research study  
37 considering perceptions of the effects of the WTR,<sup>40</sup> and focuses specifically on their effects  
38 on trainee doctors' fatigue.

## 47 48 **Method**

49  
50  
51 The research was reviewed by the Durham University School of Medicine, Pharmacy and  
52 Health Ethics Sub-Committee, and a favourable ethical opinion received.

53  
54  
55  
56 Focus groups and telephone interviews (with participants who were unable to attend a focus  
57 group) were conducted with Foundation Year One (FY1) and Foundation Year Two (FY2)



1  
2  
3 trainees and specialty trainees, sampled purposively from nine deaneries in all four nations  
4  
5 of the UK. Trainees were asked about their experience and perceptions of working hours  
6  
7 following the WTR. Some specialty trainees had experience of working before the  
8  
9 introduction of the WTR, and were asked about the change.  
10

11  
12 Recruitment was undertaken following local advice; in some cases through the Deanery, in  
13  
14 others through education centres in individual hospitals. An information sheet about the  
15  
16 study was distributed to trainees via email from the Deaneries or individual Trusts, and  
17  
18 participation was on a voluntary basis. Written consent was taken at the start of focus groups  
19  
20 and verbal consent at the start of telephone interviews, including consent for audio  
21  
22 recording. Recordings were later transcribed.  
23

## 24 25 Analysis

26  
27  
28 Data were analysed using a framework approach.<sup>41</sup> An initial stage of familiarisation with the  
29  
30 data and meetings between all four researchers engaged in this process enabled discussion  
31  
32 of the concepts and themes that emerged from the data. A thematic framework was  
33  
34 subsequently identified drawing upon *a priori* issues, *emergent* issues that were raised by  
35  
36 respondents (e.g. issues relating to work intensity), and *analytic* issues – those themes that  
37  
38 emerged from patterns and re-occurrences in the data (e.g. professionalism).  
39

40  
41 Table 1 summarises the main a priori themes, emergent themes, and analytical themes  
42  
43 related to fatigue.  
44

45  
46 Table 1. Development of themes in framework analysis  
47

48

| 49 A priori themes  | 50 Emergent themes            | 51 Analytic themes relevant to fatigue      |
|---------------------|-------------------------------|---------------------------------------------|
| 52 Knowledge of WTR | 53 Opinions of WTR            | 54 Effects of WTR implementation on fatigue |
| 55 Shift patterns   | 56 Work intensity             | 57 Effects of fatigue                       |
| 58 Rotas            | 59 Trainee influence on rotas | 60 Drivers to working over hours            |
| Compliance          | Working beyond rostered hours |                                             |

|                           |                                                     |                 |
|---------------------------|-----------------------------------------------------|-----------------|
| Educational opportunities | Rostered hours and access to learning opportunities | Professionalism |
| Monitoring process        | Commitment to patients                              | Culture         |
| Personal effects          | Commitment to colleagues                            |                 |
|                           | Expectations of colleagues                          |                 |
|                           | Monitoring and professionalism                      |                 |
|                           | Relationships with seniors                          |                 |
|                           | Fatigue                                             |                 |

## Findings

Eleven focus groups and 30 telephone interviews were conducted with 82 junior doctors.

See Table 2 for details of the training grades of participants.

Table 2. Training grades of participants

| Foundation Year 1 (FY1)       | Foundation Year 2 (FY2) | Core or specialty training up to CT/ST3* | ST4 or higher ** |
|-------------------------------|-------------------------|------------------------------------------|------------------|
| 40                            | 13                      | 7                                        | 22               |
| Total Foundation trainees: 53 |                         | Total specialty trainees: 29             |                  |

\* These are trainees in the first three years of their specialty training, and were likely to have started specialty training after the WTR introduction in 2009.

\*\* These are in higher specialty training, in their fourth year or above.

Thirty-six participants were male and 46 were female. Specialty trainee participants were training in a wide range of medical and surgical specialties, and psychiatry.

## Perceived effects of WTR on working hours

There was general agreement that working hours were much improved under the WTR, and that intended benefits in terms of reduced trainee fatigue and improved work-life balance

1  
2  
3 had been achieved to some extent. Many trainees felt that the 48-hour limit was appropriate  
4  
5 and enabled sufficient training experience, albeit with a perceived lack of flexibility.  
6  
7

8  
9 *“I think, speaking to people who didn’t have the forty-eight hour working time directive*  
10 *thing, we get a lot more time to go home and enjoy ourselves and be outside the*  
11 *hospital than they ever did and I think that’s a good thing, I feel like I’ve got a bit more*  
12 *of a life.”* (Tel. Int. 22, Foundation)  
13  
14  
15  
16

17  
18 However, some participants did report still working long hours and experiencing fatigue  
19  
20 despite the 48-hour limit and this was found to be related to a number of factors including the  
21  
22 way in which the Regulations were implemented and other organisational and contextual  
23  
24 factors.  
25  
26

### 27 **Effects of WTR implementation on fatigue**

28

29  
30 The WTR have not entirely eliminated long hours, with some trainees giving examples of  
31  
32 working up to 100 hours in a week. However, fatigue did not necessarily arise just from the  
33  
34 long hours worked, but also the organisation of work within those hours, for example the  
35  
36 mixture of day and night shifts, and long shifts straddling day and night (e.g. 2.00pm to  
37  
38 2.00am). Rotas could involve five consecutive days at work with 13-hour shifts, and working  
39  
40 up to 12 consecutive days or, for some, seven consecutive nights (despite Royal College  
41  
42 recommendations to the contrary). Trainees reported that averaging meant that a working  
43  
44 week could exceed 70 hours and remain compliant.  
45  
46  
47

48  
49 *“I don’t think the hours are long, so doing a 12 hour day or 13 hour day is fine, I think*  
50 *doing 12 days in a row you hit delirium about day ten and then you over-ride it...so I*  
51 *don’t think it’s the shift I think it’s the number of days you work in a row.”* (Focus  
52  
53 group 3, Foundation)  
54  
55  
56  
57  
58  
59  
60

1  
2  
3 *“There’s no continuity in terms of predictability of, right this is what I’m doing and, for*  
4 *example, my rota you run an eight cycle rota so you’ve got eight weeks to get*  
5 *through and none of those eight weeks are the same at all, and you jump around with*  
6 *longs and lates in-between and I think that from my side is what creates fatigue.”*  
7  
8

9  
10  
11 (Focus group 10, Specialty)  
12

13  
14 *“That was a particularly difficult shift on the assessment suite because you would go*  
15 *from five long days with maybe two days off, or a day off sometimes, and then onto a*  
16 *period of nights, you are constantly swapping from nights to days which was tiring,*  
17 *and 12 hour shifts and 13 hour shifts were always a bit of a drag.”* (Tel. Int. 22,  
18  
19

20  
21  
22 Foundation)  
23

24  
25  
26 There was also a perception that twelve-hour shifts were more fatiguing, with less ‘down-  
27  
28 time’ than longer but less intense on-call sessions. Work intensity was also increased by  
29  
30 rotas involving cross-cover out of hours.  
31

32  
33  
34 *“My personal opinion is [the WTR have] actually increased fatigue and stress in the*  
35 *fact that you feel you have to get an increased amount of work done in a shorter*  
36 *amount of time.”* (Tel. Int. 16, Foundation)  
37  
38

39  
40  
41 Provision of facilities for taking rest during a night shift was also being reduced which,  
42  
43 alongside less capacity to take breaks or compensatory rest, added to the fatigue  
44  
45 experienced. Rest periods were also lost in half days – sometimes inserted into rotas to  
46  
47 balance hours – not always being taken, sometimes because senior clinical staff were  
48  
49 unaware of them, so workload did not respond to working hours.  
50

51  
52  
53 *“The trouble with night shift is being able to sleep during the day and most hospitals*  
54 *have no facility to actually catch a nap while on nights. The last time I worked in a*  
55 *hospital with bedrooms for on-call staff was in 2007 and that’s despite guidance from*  
56  
57  
58  
59  
60

1  
2  
3 *the Royal College of Physicians that it should be possible for someone to have a*  
4 *short nap.” (Tel. Int. 23, Specialty)*  
5  
6  
7

8  
9 *“The difficulty is you may be entitled to various half days but the chances of them*  
10 *actually materialising are very slight...unless these things are really formalised and*  
11 *recognised they just don’t happen. I mean you can just about get your half day off*  
12 *before nights because everyone understands that you’re about to start nights...but*  
13 *the rest of them just don’t happen.” (Tel. Int. 19, Foundation)*  
14  
15  
16  
17

18  
19  
20 Fatigue did not just arise from hours specified in rota design. There were many reasons,  
21 including some voluntary, for trainees working beyond their rostered hours.  
22  
23

### 24 25 **Drivers to work long hours** 26

27  
28  
29 Some reasons for working longer hours than scheduled stemmed from the capacity to fit  
30 workload into the working period. This was more evident in shift work, where there was a  
31 feeling that incoming doctors in the evening may not have the capacity to perform non-  
32 urgent tasks, so the present doctor would finish those tasks before leaving. In contrast, in  
33 on-call rotas a trainee would simply pass the bleep to the incoming doctor and so have a  
34 cleaner handover.  
35  
36  
37  
38  
39  
40  
41

42  
43 *“You kind of know yourself if I was to leave this work it’s only going to be there for me*  
44 *in the morning and there’s a ward round in the morning, so I will have to get loads*  
45 *more work handed my way. So you want to get things finished.” (Tel. Int. 2,*  
46 *Foundation)*  
47  
48  
49

50  
51  
52 Other drivers came from missing educational opportunities if trainees did not attend work  
53 outside the rota, including going to work on rostered days off. These opportunities included  
54 attending ward rounds and observing in theatre. While benefits of the WTR for work-life  
55  
56  
57  
58  
59  
60

1  
2  
3 balance were perceived, there was a sense that some educational activity that had been part  
4 of the 'work' domain was now being taken home. This included portfolio completion and  
5 reading that may have been done in the workplace during slack periods on-call.  
6  
7  
8  
9

10 *"If you haven't got enough time to eat or go to the toilet, you can't leave work on time,*  
11 *then you definitely don't have time to go to clinics, you definitely don't have time to do*  
12 *audits or anything like that during work, it basically means that anything that is*  
13 *exclusively for your own training is basically done in your own time and the amount of*  
14 *time available to you is really diminished."* (Tel. Int. 7, Specialty)  
15  
16  
17  
18  
19

20  
21  
22 Although this increased their working hours and reduced time for rest and recuperation, the  
23 benefit of taking up such opportunities was often seen to outweigh this.  
24  
25  
26

27 *"I've got no problems with the fact that I work a little bit over and take the extra time*  
28 *to get training opportunities and that increases my hours to get better at my job.*  
29 *That's personal sacrifice, personal advancement type stuff to get a better job to*  
30 *become a consultant."* (Focus group 11, Specialty)  
31  
32  
33  
34  
35  
36

37 There were also professional and cultural reasons for working beyond rostered hours. These  
38 related to the expectations and norms perceived among their professional group and the  
39 workplace. Trainee doctors often worked beyond rostered hours due to a sense of  
40 commitment and responsibility, both to patients and to colleagues. There were cases of  
41 trainees staying late to hand over the care of a patient, rather than force two handovers (for  
42 example where a junior doctor would stay to complete an admission in A&E, rather than  
43 hand over to another FY2 doctor, who would then have to hand over to the specialty where  
44 the patient was being admitted), due to concern for continuity of care and the risk of  
45 information being lost. There was also a strong sense of collegiality, expressed as a  
46 responsibility not to burden colleagues with routine tasks particularly as they were likely to  
47 face other immediate demands at the handover time.  
48  
49  
50  
51  
52  
53  
54  
55  
56  
57  
58  
59  
60

1  
2  
3           *“We have just never taken the half days because we’re so busy, you know; we could*  
4           *have done, but would have screwed over our colleagues.”* (Focus group 2,  
5           Foundation)  
6  
7

8  
9  
10       At times, however, this could be perceived as a cultural expectation that some jobs would  
11       not be left – so less a choice, more an imposition. There were references to a negative  
12       culture where trainees could experience pressure from senior doctors, and other  
13       professions, to stay beyond their rostered hours, with implication of unprofessionalism if they  
14       left on time. There was also a perception amongst trainees that their professional reputation  
15       was at risk, with implications for an employment reference and future career.  
16  
17

18  
19  
20       Concerns about working hours were often not recognised or appreciated by seniors, with  
21       some respondents identifying a dismissive attitude towards the WTR, and a feeling that such  
22       limitations were counter to medical professionalism. Some trainees also agreed that limited  
23       hours undermined professional autonomy, a feeling exacerbated if hours were enforced  
24       during the periodic two-week monitoring process. Despite their being conscious of working  
25       beyond rostered hours, few trainees kept their own record of hours worked. This was partly  
26       due to their view of medicine and the nature of their work, meaning that working to limited  
27       hours was not an issue to them.  
28  
29

30  
31           *“We are treated usually like we are working late due to our own failings which is not a*  
32           *nice atmosphere to work in, I think it’s very important that you feel you are working,*  
33           *especially as a junior in a new career, you’re working somewhere you are*  
34           *appreciated, valued and not being looked at suspiciously.”* (Tel. Int. 21, Foundation)  
35  
36  
37

38  
39  
40       Gaps in rotas also placed additional pressure on the system, and so on individual doctors.  
41       These arose from staff shortages caused by under-recruitment, as well as absences. This  
42       often meant providing informal cover, for example in extended shifts. While locums were  
43       used, external locums were felt to be sometimes unreliable, meaning last minute cover was  
44  
45  
46  
47  
48  
49  
50  
51  
52  
53  
54  
55  
56  
57  
58  
59  
60

1  
2  
3 often necessary. Formal internal locum shifts were sometimes used, and cross-referenced  
4  
5 against rotas to ensure an individual did not exceed WTR hours, and there was no reported  
6  
7 pressure to undertake locum shifts. The trainees reported that there was a shortage of  
8  
9 available doctors to fill rotas, even without the need to comply with the WTR. Some trainees  
10  
11 felt that even fully staffed rotas would be stretched because the workload had increased  
12  
13 since the staffing levels were initially put in place.

14  
15  
16  
17 *“The fundamental issue is trying to do a decent job and you can’t do a decent job if*  
18  
19 *there aren’t enough of you on the ground, so you are always working many hours in*  
20  
21 *excess of what you should be doing, you end up tired and exhausted and jaded and*  
22  
23 *then you’re not doing a good job for your patient.” (Tel. Int. 29, Foundation)*

#### 24 25 26 **Effects of fatigue**

27  
28  
29 Trainees identified effects of fatigue arising from their working hours. While detriments to  
30  
31 their skills and judgement were identified, these were mostly felt to affect efficiency rather  
32  
33 than safety – however risks to patient safety cannot be discounted. Some reported that  
34  
35 fatigue affected their ability to retain new information.

36  
37  
38 *“I think when you were getting to the end of a thirteen hour shift you found that your*  
39  
40 *technical skills, like your ability to put a cannula into someone and stuff like that, it*  
41  
42 *certainly decreases, I find it gets a lot harder to do things that require more*  
43  
44 *concentration, things like that, but I think you’re also quite aware of that, so patient*  
45  
46 *safety wise you are aware that you are not at your best so you often check more of*  
47  
48 *your decisions with other people and things like that.” (Tel. Int. 22, Foundation)*

49  
50  
51 *“I think 12 days in a stretch is too long without a day off, I just think it’s a really long*  
52  
53 *stretch...I think [the effect] is fatigue really and I suppose you learn less towards the*  
54  
55 *end of those days really because you are just tired.” (Tel. Int. 26, Foundation)*



1  
2  
3 Fatigue was also reported to affect mood, particularly when switching between different  
4 working patterns, with consequences for their professional manner. This may have  
5 consequences for team-working and interprofessional communication, as well as for  
6 interactions with patients.  
7  
8  
9

10  
11 *“You become more irritable sometimes as well, I noticed I was a bit more snappy*  
12 *[when switching between long days and nights] (Focus group 5, Foundation)*  
13

14  
15  
16  
17 *“You don’t make as good decisions and you’re more grumpy, you’re less likely to be*  
18 *good with the patients, you know, you’re more likely to just go in there and take the*  
19 *blood rather than actually you know being a doctor to them...so you have to be a lot*  
20 *more careful when you’re tired I suppose.” (Tel. Int. 9, Foundation)*  
21  
22  
23  
24

25  
26  
27 These issues were sometimes compounded by hunger and discomfort arising from not  
28 achieving rest breaks during long shifts.  
29  
30

31  
32 *“I think when I’m hungry my fuse is shorter and I think my compassion towards others*  
33 *is not as what it should be.” (Tel. Int. 2, Foundation)*  
34  
35  
36

## 37 38 **Discussion**

39  
40 Despite the introduction of restricted working hours for junior doctors in the UK, long hours  
41 and fatigue remain, with associated consequences for performance. There was general  
42 agreement that restricting working hours was a positive thing, but that problems remained  
43 with acute workload in some working patterns. Conversely, while most felt that a 48 hour  
44 limit was appropriate, some would like more flexibility to exceed it when necessary.  
45  
46  
47  
48  
49

50  
51  
52 It was considered that the amount of work to be carried out had not reduced, increasing the  
53 perceived intensity of work. Some working patterns were considered particularly intense and  
54 detrimental to personal wellbeing – with consequences for performance and education. Long  
55  
56  
57  
58  
59  
60

1  
2  
3 periods without a day off in particular were tiring. There is no objective record of hours  
4 worked, as WTR compliance is derived from New Deal monitoring reports, and trainees  
5 reported no formal measures for health and wellbeing.  
6  
7  
8  
9

10 There was evidence that the design of rotas was not the only factor working against  
11 wellbeing. Trainees were often working beyond their rostered hours for voluntary reasons of  
12 workload, perceived need to gain educational opportunities, and collegiality, but also for  
13 more external reasons such as the expectations of others and gaps in the rota. Notably  
14 these are corollaries of the voluntary reasons – rota gaps increase workload, and adverse  
15 cultures may define professional practice. Contrary to recent recommendations that ‘every  
16 moment count’ towards education in the workplace,<sup>42</sup> for some trainees at least there is  
17 increasing separation between work and education, and an increase in work intensity that  
18 may be adding new stresses to the trainee population.  
19  
20  
21  
22  
23  
24  
25  
26  
27  
28  
29

30 The current study provides evidence that three years after the implementation of the WTR,  
31 and with rotas that are at least compliant on paper, fatigue remains an issue for doctors in  
32 training. This reflects some findings in the literature that a reduction in working hours alone is  
33 not enough. Although much of the literature relating to fatigue comes from the USA where  
34 restricted working hours are still much longer than in Europe (e.g. >24 hour shifts until 2011,  
35 or 80-hour weeks), two UK self-report studies conducted shortly after implementation of the  
36 48-hour working week have highlighted the effect of different schedules on fatigue, including  
37 the negative effect of working seven consecutive nights, having only one day of rest after  
38 night shifts, intervals of less than ten hours between shifts, and shifts of twelve consecutive  
39 days.<sup>30 31</sup> Difficulty achieving naps during night shifts, and poor provision for naps, has been  
40 reported elsewhere.<sup>33</sup> The current study has identified that fatigue is related to a number of  
41 complex issues, including rota design, but also including contextual issues such as staff  
42 shortages and rota gaps, and broader professional and cultural issues.  
43  
44  
45  
46  
47  
48  
49  
50  
51  
52  
53  
54  
55  
56  
57  
58  
59  
60

1  
2  
3 Long working hours may be a symptom of, and contribute to, an adverse culture.

4  
5 Expectations of long hours, coupled with a lack of their explicit recognition, may be  
6  
7 symptomatic of 'institutionalised disrespect' of workers,<sup>34</sup> which if it is felt to be normal may  
8  
9 lead to further dysfunctional behaviours. Culture, particularly at the level of basic underlying  
10  
11 assumptions that may underpin day-to-day work, can be extremely difficult to change.<sup>34 43</sup>

12  
13 The working environment has also been found to be an important factor in encouraging and  
14  
15 developing professionalism,<sup>44</sup> and some trainees felt undermined by aspects of the  
16  
17 professional and organisational culture and felt there was a lack of recognition of the extra  
18  
19 hours they worked.

20  
21  
22 The broader cultural issues identified in relation to trainees' professional autonomy and the  
23  
24 relationship between trainees and their seniors are of current relevance in light of the Francis  
25  
26 report's recommendations for fundamental culture change in the NHS.<sup>45</sup> Following these  
27  
28 recommendations, it has been argued that more sophisticated understandings of cultural  
29  
30 dynamics and the role of policy in shaping these may be needed.<sup>46</sup> Fatigue may be an  
31  
32 important mediating variable in the perpetuation of adverse cultures and practice failings,  
33  
34 and as such should be an important component of any policies to monitor and improve  
35  
36 workplace cultures.

37  
38  
39 Evaluation of the WTR must be considered in relation to the historical context within which  
40  
41 they were implemented. Perceptions of the WTR were not isolated from other changes  
42  
43 affecting working hours, particularly the 1991 New Deal for Junior Doctors, which imposed  
44  
45 restrictions for the first time. At an organisational level, changes relating to the reorganisation  
46  
47 of specialty training over the last 20 years<sup>47</sup> affected the working environment. Trainees now  
48  
49 have to settle on a career specialty training path sooner, meaning that the Senior House  
50  
51 Officer (SHO) posts they would have filled in other specialties for up to several years may  
52  
53 remain unfilled. These gaps are compounded by the reduction in the number of overseas-  
54  
55 qualified doctors entering the UK following changes to immigration policy in 2008. The  
56  
57  
58  
59  
60

1  
2  
3 workload and hence fatigue experienced by individual trainees can therefore be seen as the  
4  
5 end-point of many contributory factors.  
6

### 7 8 **Strengths and limitations**

9  
10 The strength of the current study is the breadth of trainee participants, covering a range of  
11  
12 training grades and specialties and all four nations of the UK, so gaining a picture across the  
13  
14 trainee experience. A weakness is that the trainee participants were volunteers to the study,  
15  
16 and as such may be open to self-selection bias. However, this risk is mitigated by the  
17  
18 instance of one group, run as part of Foundation Programme teaching, where all but four of  
19  
20 a cohort of F1s were able to attend. That group identified the same issues as the wider  
21  
22 sample, suggesting the prevalence of the concerns identified is not limited to a particularly  
23  
24 engaged sample.  
25  
26

### 27 28 **Conclusion**

29  
30 The WTR have reduced the hours junior doctors work, but have not fully addressed  
31  
32 problems of fatigue and stress, due to issues in their implementation and other contextual  
33  
34 factors. The long term risks of this continued stress and fatigue, for the doctors themselves  
35  
36 and for the effective delivery of a healthcare service, should not be ignored.  
37  
38

39  
40 Future research could usefully involve an investigation of work intensity and its effects on  
41  
42 doctors' education, performance and wellbeing, and its impact on patient care. Such  
43  
44 research should consider the clinical demands of different specialties and the working  
45  
46 environment. Policy and practice could consider how best to monitor both working hours and  
47  
48 doctors' wellbeing. The closer and more effective involvement of trainees in rota design, with  
49  
50 consideration of the physiological aspects of sleep and fatigue, may help to avoid some  
51  
52 stresses, but there may need to be more fundamental consideration of necessary staffing  
53  
54 levels.  
55  
56

### 57 58 **Acknowledgements**

1  
2  
3 This research was funded by the General Medical Council. The authors also thank all the  
4  
5 trainee doctors who took part in focus groups or telephone interviews.  
6  
7

### 8 **Contributors and sources:**

9  
10  
11 This article draws on research commissioned by the UK General Medical Council, designed  
12  
13 by GM and BB, and conducted by all authors. All four authors were members of the Centre  
14  
15 for Medical Education Research, Durham University, UK, when this research was carried  
16  
17 out. All authors contributed to the analysis and writing of the report and the writing of this  
18  
19 article, and approved the final version. GM is guarantor of the article.  
20  
21  
22

23  
24 **Competing interests:** We have read and understood the BMJ Group policy on declaration  
25  
26 of interests and have no relevant interests to declare.  
27

28  
29 **Licence:** The Corresponding Author has the right to grant on behalf of all authors and does  
30  
31 grant on behalf of all authors, an exclusive licence on a worldwide basis to the BMJ  
32  
33 Publishing Group Ltd, and its Licensees, to permit this article (if accepted) to be published in  
34  
35 *BMJ Open* and any other BMJPGJL products and to exploit all subsidiary rights, as set out in  
36  
37 our licence.  
38

### 39 **References**

- 40  
41  
42 1. Morrow G, Burford B, Carter M, *et al*. *The Impact of the Working Time Regulations on*  
43  
44 *medical education and training: Literature review*. Report to the GMC, August 2012.  
45  
46 [http://www.gmc-](http://www.gmc-uk.org/The_Impact_of_the_Working_Time_Regulations_on_Medical_Education_and_Training_Literature_Review.pdf)  
47  
48 [uk.org/The\\_Impact\\_of\\_the\\_Working\\_Time\\_Regulations\\_on\\_Medical\\_Education\\_and\\_Tr](http://www.gmc-uk.org/The_Impact_of_the_Working_Time_Regulations_on_Medical_Education_and_Training_Literature_Review.pdf)  
49  
50 [aining\\_Literature\\_Review.pdf](http://www.gmc-uk.org/The_Impact_of_the_Working_Time_Regulations_on_Medical_Education_and_Training_Literature_Review.pdf) 51155615.pdf  
51  
52 2. Ayas NT, Barger LK, Cade BE, *et al*. Extended work duration and the risk of self-  
53  
54 reported percutaneous injuries in interns. *JAMA* 2006;296:1055-62.  
55  
56  
57  
58  
59  
60

- 1  
2  
3 3. Fisman DN, Harris AD, Rubin M, *et al.* Fatigue increases the risk of injury from sharp  
4 devices in medical trainees: results from a case-crossover study. *Infect Cont Hosp Ep*  
5 2007;28:10-17.  
6
- 7  
8  
9 4. Barger LK, Ayas NT, Cade BE, *et al.* Impact of extended-duration shifts on medical  
10 errors, adverse events, and attentional failures. *PLOS Med* 2006;3:e487.  
11
- 12  
13 5. Gander P, Purnell H, Garden A, *et al.* Work patterns and fatigue-related risk among  
14 junior doctors. *Occup Environ Med* 2007;64:733-738.  
15
- 16  
17 6. Kohen-Raz R, Himmelfarb M, Tzur S, *et al.* An initial evaluation of work fatigue and  
18 circadian changes as assessed by multiplate posturography. *Percept Motor Skill*  
19 1996;82:547-557.  
20
- 21  
22 7. Parshuram CS, Dhanani S, Kirsh JA, *et al.* Fellowship training, workload, fatigue and  
23 physical stress: A prospective observational study. *Can Med Assoc J* 2004;170:965-970.  
24
- 25  
26 8. Smith AM, Morris P, Rowell KO, *et al.* Junior doctors and the full shift rota - psychological  
27 and hormonal changes: a comparative cross-sectional study. *Clin Med* 2006;6:174-177.  
28
- 29  
30 9. Block L, Wu AW, Feldman L, *et al.* Residency schedule, burnout and patient care among  
31 first-year residents. *Postgrad Med J* 2013;89:495-500.  
32
- 33  
34 10. Gohar A, Adams A, Gertner E, *et al.* Working memory capacity is decreased in sleep-  
35 deprived internal medicine residents. *J Clin Sleep Med* 2009;5:191-197.  
36
- 37  
38 11. Lockley SW, Cronin JW, Evans EE, *et al.* Effect of reducing interns' weekly work hours  
39 on sleep and attentional failures. *New Engl J Med* 2004;351:1829-1837.  
40
- 41  
42 12. Jakubowicz DM, Price EM, Glassman HJ, *et al.* Effects of a twenty-four hour call period  
43 on resident performance during simulated endoscopic sinus surgery in an Accreditation  
44 Council for Graduate Medical Education-compliant training program. *Laryngoscope*  
45 2005;115:143-146.  
46
- 47  
48 13. Gander P, Millar M, Webster C, *et al.* Sleep loss and performance of anaesthesia  
49 trainees and specialists. *Chronobiol Int* 2008; 25:1077-1091.  
50
- 51  
52 14. Brandenberger J, Kahol K, Feinstein AJ, *et al.* Effects of duty hours and time of day on  
53 surgery resident proficiency. *Am J Surg* 2010;200:814-818.  
54  
55  
56  
57  
58  
59  
60

- 1  
2  
3 15. Ellman PI, Law MG, Tache-Leon C, *et al.* Sleep deprivation does not affect operative  
4 results in cardiac surgery. *Ann Thorac Surg* 2004;78:906-911.
- 5  
6  
7 16. Lehmann KS, Martus P, Little-Elk S, *et al.* Impact of sleep deprivation on medium-term  
8 psychomotor and cognitive performance of surgeons: prospective cross-over study with  
9 a virtual surgery simulator and psychometric tests. *Surgery* 2010;147:246-254.
- 10  
11  
12 17. Grantcharov TP, Bardram L, Funch-Jensen P, *et al.* Laparoscopic performance after one  
13 night on call in a surgical department: prospective study. *Brit Med J* 2001;323:1222-3.
- 14  
15  
16 18. Landrigan CP, Rothschild JM, Cronin JW, *et al.* Effects of reducing interns' work hours  
17 on serious medical errors in intensive care units. *New Engl J Med* 2004;351:1838-1848.
- 18  
19  
20 19. Lockley SW, Landrigan CP, Barger LK, *et al.* Harvard Work Hours, Health Safety Group.  
21 When policy meets physiology: the challenge of reducing resident work hours. *Clin*  
22 *Orthop Relat R* 2006;449:16-127.
- 23  
24  
25 20. Majekodunmi A, Landrigan CP. The effect of physician sleep deprivation on patient  
26 safety in perinatal-neonatal medicine. *Am J Perinat* 2012;29:43-48.
- 27  
28  
29 21. Vorona RD, Chen IA, Ware JC. Physicians and sleep deprivation. *Sleep Medicine Clinics*  
30 2009;4:527-540.
- 31  
32  
33 22. Paice E, Hamilton-Fairley D. Avoiding burnout in new doctors: sleep, supervision and  
34 teams. *Postgrad Med J* 2013;89:493.
- 35  
36  
37 23. Sokol DK. Waking up to the effects of fatigue in doctors. *Brit Med J* 2013;347:f4906
- 38  
39  
40 24. Conigliaro J, Frishman WH, Lazar EJ, *et al.* Internal medicine housestaff and attending  
41 physician perceptions of the impact of the New York State Section 405 regulations on  
42 working conditions and supervision of residents in two training programs. *J Gen Intern*  
43 *Med* 1993; 8:502-507.
- 44  
45  
46 25. Kort KC, Pavone LA, Jensen E, *et al.* Resident perceptions of the impact of work-hour  
47 restrictions on health care delivery and surgical education: time for transformational  
48 change. *Surgery* 2004;136:861-871.
- 49  
50  
51  
52  
53  
54  
55  
56  
57  
58  
59  
60

- 1  
2  
3 26. Kiernan M, Civetta J, Bartus C, *et al.* 24 hours on-call and acute fatigue no longer  
4 worsen resident mood under the 80-hour work week regulations. *Curr Surg* 2006;63:237-  
5 241.  
6  
7  
8  
9 27. Cull WL, Mulvey HJ, Jewett EA, *et al.* Pediatric residency duty hours before and after  
10 limitations. *Pediatrics* 2006;118:e1805-1811.  
11  
12  
13 28. Reddy R, Guntupalli K, Alapat P, *et al.* Sleepiness in medical ICU residents. *Chest*  
14 2009;135:81-85.  
15  
16  
17 29. Berios I, Surani S, Simmons M. Assessing reaction time among emergency medicine  
18 residents working different shift hours. *Ann Emerg Med* 2009; 54: S35.  
19  
20  
21 30. Brown M, Tucker P, Rapport F, *et al.* The impact of shift patterns on junior doctors'  
22 perceptions of fatigue, training, work/life balance and the role of social support. *Qual Saf*  
23 *Health Care* 2010;19:e36.  
24  
25  
26  
27 31. Tucker P, Brown M, Dahlgren A, *et al.* The impact of junior doctors' worktime  
28 arrangements on their fatigue and well-being. *Scand J Work Env Hea* 2010;36:458-46  
29  
30  
31 32. Arora V, Dunphy C, Chang VY, *et al.* The effects of on-duty napping on intern sleep time  
32 and fatigue. *Ann Intern Med* 2006;144:792-798.  
33  
34  
35  
36 33. Jackson EJ, Moreton A. Safety during night shifts: a cross-sectional survey of junior  
37 doctors' preparation and practice. *BMJ Open* 2013 3: doi: 10.1136/bmjopen-2013-  
38 003567.  
39  
40  
41 34. Leape LL, Shore MF, Dienstag JL, *et al.* A culture of disrespect, Part 1: The nature and  
42 causes of disrespectful behavior by physicians. *Acad Med* 2012;87:845-852.  
43  
44  
45 35. O'Gallagher MK, Lewis G, Mercieca K, *et al.* The impact of the European Working Time  
46 Regulations on Ophthalmic Specialist Training - A national trainee survey. *Int J Surg*  
47 2013: <http://dx.doi.org/10.1016/j.ijsu.2013.08.007>  
48  
49  
50  
51  
52 36. Illing JC, Carter M, Thompson NJ, *et al.* *Evidence synthesis on the occurrence, causes,*  
53 *consequences, prevention and management of bullying and harassing behaviours to*  
54 *inform decision making in the NHS. Final report.* NIHR Service Delivery and Organisation  
55 programme; 2013.  
56  
57  
58  
59  
60



- 1  
2  
3 37. Williams ES, Konrad TR, Scheckler WE, *et al.* Understanding physicians' intentions to  
4 withdraw from practice: the role of job satisfaction, job stress, mental and physical  
5 health. *AHCM* 2001;2:243-262.  
6  
7  
8  
9 38. Edwards N, Kornacki MJ, Silversin J. Unhappy doctors: what are the causes and what  
10 can be done? *Brit Med J* 2002;324:835-8.  
11  
12  
13 39. Visser MRM, Smets EMA, Oort FJ, *et al.* Stress, satisfaction and burnout among Dutch  
14 medical specialists. *CMAJ* 2003;168:271-5.  
15  
16  
17 40. Morrow G, Burford B, Carter M, *et al.* *The Impact of the Working Time Regulations on*  
18 *medical education and training: Final report on primary research.* Report to the GMC,  
19 August 2012. [http://www.gmc-](http://www.gmc-uk.org/The_Impact_of_the_Working_Time_Regulations_on_Medical_Education_and_Training_Final_Report_on_Primary_Research.pdf_51157039.pdf)  
20 [uk.org/The\\_Impact\\_of\\_the\\_Working\\_Time\\_Regulations\\_on\\_Medical\\_Education\\_and\\_Tr](http://www.gmc-uk.org/The_Impact_of_the_Working_Time_Regulations_on_Medical_Education_and_Training_Final_Report_on_Primary_Research.pdf_51157039.pdf)  
21 [aining\\_Final\\_Report\\_on\\_Primary\\_Research.pdf\\_51157039.pdf](http://www.gmc-uk.org/The_Impact_of_the_Working_Time_Regulations_on_Medical_Education_and_Training_Final_Report_on_Primary_Research.pdf_51157039.pdf)  
22  
23  
24  
25  
26  
27 41. Ritchie J, Spencer L. Qualitative data analysis for applied policy research. In: Bryman A,  
28 Burgess RG, editors. *Analysing Qualitative Data.* London: Routledge; 1994. p.173-194.  
29  
30  
31 42. Temple J. Time for Training: A review of the impact of the European Working Time  
32 Directive on the quality of training. 2010.  
33  
34  
35 [http://www.mee.nhs.uk/pdf/JCEWTD\\_Final%20report.pdf](http://www.mee.nhs.uk/pdf/JCEWTD_Final%20report.pdf)  
36  
37  
38 43. Schein EH. *Organisational culture and leadership.* 4<sup>th</sup> edn. Jossey-Bass, 2010.  
39  
40 44. Morrow G, Burford B, Rothwell C, Carter M, McLachlan J, Illing J. *Professionalism in*  
41 *healthcare professionals. Perceptions of professionalism.* Final report to the hpc, 2011.  
42  
43 [http://www.hpc-](http://www.hpc-uk.org/assets/documents/10003771Professionalisminhealthcareprofessionals.pdf)  
44 [uk.org/assets/documents/10003771Professionalisminhealthcareprofessionals.pdf](http://www.hpc-uk.org/assets/documents/10003771Professionalisminhealthcareprofessionals.pdf)  
45  
46  
47 45. Francis R. *Report of the Mid Staffordshire NHS Foundation Trust public inquiry.*  
48 Stationery Office, 2013.  
49  
50  
51 46. Davies H, Mannion R. Will prescriptions for cultural change improve the NHS? *Brit Med J*  
52 2013;346:f1305.  
53  
54  
55 47. HMSO. *Hospital Doctors: Training for the future.* The report of the working group on  
56 specialist medical training. HMSO, 1993.  
57  
58  
59  
60



**Have restricted working hours reduced junior doctors' experience of fatigue? A focus group and telephone interview study**

|                                 |                                                                                                                                                                                                                                                                                                                         |
|---------------------------------|-------------------------------------------------------------------------------------------------------------------------------------------------------------------------------------------------------------------------------------------------------------------------------------------------------------------------|
| Journal:                        | <i>BMJ Open</i>                                                                                                                                                                                                                                                                                                         |
| Manuscript ID:                  | bmjopen-2013-004222.R1                                                                                                                                                                                                                                                                                                  |
| Article Type:                   | Research                                                                                                                                                                                                                                                                                                                |
| Date Submitted by the Author:   | 21-Dec-2013                                                                                                                                                                                                                                                                                                             |
| Complete List of Authors:       | Morrow, Gill; Durham University, Centre for Medical Education Research<br>Burford, Bryan; Newcastle University, School of Medical Sciences Education Development<br>Carter, Madeline; Durham University, Centre for Medical Education Research<br>Illing, Jan; Durham University, Centre for Medical Education Research |
| <b>Primary Subject Heading</b>: | Medical education and training                                                                                                                                                                                                                                                                                          |
| Secondary Subject Heading:      | Qualitative research                                                                                                                                                                                                                                                                                                    |
| Keywords:                       | FATIGUE, WORKING TIME REGULATIONS, JUNIOR DOCTORS, WORKING HOURS RESTRICTIONS, DOCTORS IN TRAINING                                                                                                                                                                                                                      |
|                                 |                                                                                                                                                                                                                                                                                                                         |

SCHOLARONE™  
Manuscripts

1  
2  
3  
4 **Have restricted working hours reduced junior doctors' experience of fatigue? A**  
5  
6 **qualitative focus group and telephone interview study**  
7  
8

9  
10 Gill Morrow

11 Senior Research Associate

12 Centre for Medical Education Research

13 Durham University

14 Burdon House

15 Leazes Road

16 Durham

17 DH1 1TA

18  
19 Bryan Burford

20 Lecturer in Medical Education

21 School of Medical Sciences Education Development

22 The Medical School

23 Ridley Building 1

24 Newcastle University

25 Newcastle upon Tyne

26 NE1 7RU

27  
28 Madeline Carter

29 Research Fellow

30 Centre for Medical Education Research

31 Durham University

32 Burdon House

33 Leazes Road

1  
2  
3 Durham

4  
5 DH1 1TA

6  
7  
8  
9 Jan Illing

10 Professor in Medical Education

11 Centre for Medical Education Research

12 Durham University

13 Burdon House

14 Leazes Road

15 Durham

16 DH1 1TA  
17  
18  
19  
20  
21  
22  
23  
24  
25  
26  
27  
28  
29  
30  
31  
32  
33  
34  
35  
36  
37  
38  
39  
40  
41  
42  
43  
44  
45  
46  
47  
48  
49  
50  
51  
52  
53  
54  
55  
56  
57  
58  
59  
60

**ABSTRACT**

**Objectives:** To explore the effects of the UK Working Time Regulations (WTR) on trainee doctors' experience of fatigue.

**Design:** Qualitative research

**Setting:** Nine deaneries in all four UK nations of the UK; secondary care

**Participants:** Focus groups or telephone interviews were conducted with trainee doctors purposively selected from Foundation Years One and Two and specialty training in the nine deaneries. 82 Eighty-two junior doctors participated: 53 Foundation Programme trainees (40 in Foundation Year 1, 13 in Foundation Year 2) and 29 specialty trainees. Thirty-six participants were male, and 46 were female. Specialty trainee participants were training in from a wide range of medical and surgical specialties, and psychiatry.

**Findings:** The implementation of the WTR, whilst acknowledged to be an improvement to the earlier situation of prolonged excessive hours, has not wholly overcome experience of long working hours and fatigue. Fatigue did not just arise from scheduled hours specified in rota design, but also from an unpredictable mixture of shifts, work intensity, which often resulted in educational tasks being taken home, and inadequate rest. It was also caused by tTrainees worked beyond their rota, for rostered hours. reasons including completing tasks, accessing educational opportunities outside scheduled hours and staffing issues. including some voluntary, and other There were also organisational, professional and cultural and contextual reasons factors, such as a sense of responsibility to patients and colleagues and the expectations of seniors. Fatigue was perceived to affect efficiency of skills and judgement, mood, and learning capacity.

1  
2  
3 **Conclusions:** The long term risks of this continued stress and fatigue, for the doctors  
4 themselves and for the effective delivery of a healthcare service, should not be ignored.  
5  
6 Current monitoring and quality management processes may need to be reviewed to increase  
7  
8 their sensitivity to issues regarding rotas and arising from hours worked. Effects on fatigue  
9  
10 and on education cannot be isolated from other contextual factors, including workforce  
11  
12 issues numbers. On-going attention needs to be paid to broader cultural issues, including for  
13  
14 example in relation to trainees' professional autonomy and the relationship between trainees  
15  
16 and their seniors.  
17  
18  
19  
20  
21  
22  
23  
24  
25  
26  
27  
28  
29  
30  
31  
32  
33  
34  
35  
36  
37  
38  
39  
40  
41  
42  
43  
44  
45  
46  
47  
48  
49  
50  
51  
52  
53  
54  
55  
56  
57  
58  
59  
60

## ARTICLE SUMMARY

### Article focus

The aim of the paper is to explore the effects of the UK Working Time Regulations (WTR) on trainee doctors' experience of fatigue.

### Key messages

- The implementation of the WTR, whilst acknowledged to be an improvement to the earlier situation of prolonged excessive hours, has not wholly overcome experience of long working hours and fatigue. Reasons for persistent fatigue include the organisation of working patterns, work compression and intensity - thus also taking more work home – and working longer than rostered hours. This was related to taking up extra educational opportunities at work and to professional and organisational culture, including trainees' sense of responsibility towards patients and colleagues and the expectations of seniors. Current monitoring and quality management processes may need to be reviewed to increase their sensitivity to issues regarding rotas and hours worked. Current monitoring processes lack sensitivity to issues regarding rotas and hours worked.
- Effects on fatigue and on education cannot be isolated from other contextual factors, including workforce issues.
- On-going attention needs to be paid to broader cultural issues identified in relation to trainees' professional autonomy and expectations placed on trainees and the relationship between trainees and their seniors.

### Strengths and limitations

- The strength of the study is the breadth of trainee participants, covering a range of training grades and specialties and all four nations of the UK.
- A potential weakness is that participants were volunteers to the study, and as such may be open to self-selection bias. However, this risk is mitigated by the instance of

1  
2  
3 one group run as part of Foundation Programme teaching, where all but four of a  
4 cohort of Foundation Year One trainees (F1s) were able to attend. That group  
5 identified the same issues as the wider sample, suggesting the prevalence of the  
6 issues identified is not limited to a particularly engaged sample. There may also be  
7 potential inaccuracies in individual recall of hours worked.  
8  
9  
10  
11  
12  
13  
14  
15  
16  
17  
18  
19  
20  
21  
22  
23  
24  
25  
26  
27  
28  
29  
30  
31  
32  
33  
34  
35  
36  
37  
38  
39  
40  
41  
42  
43  
44  
45  
46  
47  
48  
49  
50  
51  
52  
53  
54  
55  
56  
57  
58  
59  
60



1  
2  
3 **Title: Have restricted working hours reduced junior doctors' experience of fatigue? A**  
4 **qualitative focus group and telephone interview study**  
5  
6  
7

8 **Introduction**  
9

10  
11  
12 There is a considerable body of evidence recognising that fatigue has adverse physiological,  
13 psychological and cognitive effects and can lead to deficits in performance and safety.<sup>1</sup>

14  
15 Fatigue in doctors is associated with increases of risks to personal safety at work<sup>2 3</sup> and  
16 outside work,<sup>4 5</sup> and risks to health and well-being.<sup>6-9</sup> There is also evidence of detriments to  
17 performance, for example in cognitive abilities<sup>10 11</sup> and psychomotor skills,<sup>12-14</sup> (although  
18 some studies have found no performance effects<sup>15 16</sup>). Fatigue has also been associated  
19 directly with negative consequences for patient safety such as clinical errors and diagnostic  
20 mistakes.<sup>4 5 17-20</sup> This has been a concern in medicine for several years<sup>21</sup> and remains so  
21 today.<sup>22 23</sup> The effects may be compounded by a risk that doctors do not recognise that they  
22 may be subject to adverse effects.<sup>23</sup>  
23  
24  
25  
26  
27  
28  
29  
30  
31  
32

33  
34 Several countries have introduced limits on working hours. For example, in the USA, since  
35 2003, there has been national implementation of an Accreditation Council for Graduate  
36 Medical Education (ACGME) 80-hour resident work week restriction, averaged over four  
37 weeks; however the limit is lower in Europe. The European Working Time Directive (EWTD)  
38 was introduced to limit hours, to address health and safety concerns for all workers arising  
39 from long hours. Each European Union member state implemented the Directive in its own  
40 legislation – the UK as the Working Time Regulations (1998). These Regulations (the WTR)  
41 have applied fully to junior doctors since 2009, with a limit of 48 hours per week, averaged  
42 across a reference period of 26 weeks, alongside specified minimum rest periods. The WTR  
43 are implemented in rotas (work schedules) alongside the New Deal, which specifies a  
44 maximum of 56 hours per week, with a system of banded payments.  
45  
46  
47  
48  
49  
50  
51  
52  
53  
54  
55  
56  
57  
58  
59  
60

1  
2  
3 Positive effects of a reduction in working hours have been found in many studies,<sup>24-26</sup> but not  
4 all.<sup>27 28</sup> The effect varies with the precise implementation of restrictions, with fatigue affected  
5 by work patterns including the number of consecutive days or nights worked, the intervals  
6 between shifts, and the timing of shifts (day/evening/night).<sup>29-31</sup> Short naps may ameliorate  
7 the negative effects of fatigue,<sup>32</sup> and awareness of the benefits of naps and other  
8 recommendations and interventions to limit fatigue associated with rotating shift work may  
9 be needed.<sup>33</sup>

10  
11  
12  
13  
14  
15  
16  
17  
18 Organisational cultures of long or antisocial hours<sup>34</sup> may also be a factor impacting on stress  
19 and fatigue, and trainees have reported being unofficially expected to work extra hours  
20 voluntarily.<sup>35</sup> Furthermore workload pressures and poor work design may increase risks of  
21 negative behaviours among staff.<sup>36</sup> Limits on professional autonomy – the amount of control  
22 doctors have traditionally held over their practice – may also increase doctors' stress and  
23 reduce job satisfaction.<sup>37-39</sup>

24  
25  
26  
27  
28  
29  
30  
31  
32 Consequently, simply restricting the number of work hours may be insufficient to address  
33 issues relating to fatigue and its consequences. With this in mind, the question is raised  
34 whether the WTR will have achieved the aim of improving junior doctors' well-being and  
35 fatigue. To date, there has been little research looking directly at the effects of the WTR as  
36 implemented and experienced in practice. This paper draws on a larger research study  
37 considering perceptions of the effects of the WTR,<sup>40</sup> and focuses specifically on their effects  
38 on trainee doctors' fatigue.

## 47 48 **Method**

49  
50  
51 The research was reviewed by the Durham University School of Medicine, Pharmacy and  
52 Health Ethics Sub-Committee, and a favourable ethical opinion received.

53  
54  
55  
56 Focus groups and telephone interviews (with participants who were unable to attend a focus  
57 group) were conducted with Foundation Year One (FY1) and Foundation Year Two (FY2)

1  
2  
3 trainees and specialty trainees, sampled purposively from nine deaneries in all four nations  
4 of the UK. The Foundation Programme is a two-year generic training programme undertaken  
5 after completing medical school, and is followed by specialist or general practice training.  
6  
7 The WTR apply to all years of training in the same way. Trainees were asked about their  
8 experience and perceptions of working hours following the WTR.  
9  
10  
11  
12

13  
14 The focus group topic guide and interview questions focused on perceptions and experience  
15 of working hours following the WTR and any educational or personal impact. Trainees were  
16 asked about their knowledge of the WTR; their perceptions of their working hours in practice,  
17 including shifts, rotas and compliance; issues concerning educational opportunities;  
18 monitoring of working hours, and any personal effects they experienced. Some specialty  
19 trainees had experience of working before the introduction of the WTR, and were asked  
20 about the change.  
21  
22  
23  
24  
25  
26  
27  
28

29 Recruitment was undertaken following local advice; in some cases through the Deanery, in  
30 others through education centres in individual hospitals. An information sheet about the  
31 study was distributed to trainees via email from the Deaneries or individual Trusts, and  
32 participation was on a voluntary basis. Written consent was taken at the start of focus groups  
33 and verbal consent at the start of telephone interviews, including consent for audio  
34 recording. Recordings were later transcribed. GM and BB conducted the focus groups and  
35 telephone interviews. Focus groups lasted between 60 and 90 minutes, and telephone  
36 interviews between 30 and 45 minutes.  
37  
38  
39  
40  
41  
42  
43  
44  
45

## 46 **Analysis**

47  
48  
49 Data were analysed using a framework approach.<sup>41</sup> An initial stage of familiarisation, with the  
50 data, to gain an overall view of the data, involved reading the transcripts and noting the  
51 range and depth in the data collected. Meetings between all four researchers engaged in this  
52 process (GM, BB, MC, JI) enabled discussion of the concepts and themes that emerged  
53 from the data. A thematic framework was subsequently identified by GM and BB. This  
54  
55  
56  
57  
58  
59  
60

involved identifying the key issues, concepts or themes by which the data could be examined and sorted. The construction of the framework drew upon:

- *a priori* issues - those issues that were known or assumed to be pertinent, that guided the study aims and were developed into the topic guide/interview schedule;
- *emergent* issues - those issues that were raised by the respondents (e.g. issues relating to work intensity);
- *analytic* issues - those themes that emerged from patterns and re-occurrences in the data (e.g. professionalism)

The framework was then applied to the data by GM and BB through indexing and charting, and themes and sub-themes were further refined. Finally, a stage of mapping and interpretation involved bringing the key themes within the data set together and pulling together the findings of the analysis as a whole. Table 1 summarises the main *a priori* themes, emergent themes, and analytic themes related to fatigue and illustrates the mapping and interpretation of the themes. The process of analysis helped provide an explanation of why fatigue remains an issue, and of the inter-relatedness of the issues identified.

drawing upon *a priori* issues, *emergent* issues that were raised by respondents (e.g. issues relating to work intensity), and *analytic* issues. – those themes that emerged from patterns and re-occurrences in the data (e.g. professionalism). Data from focus groups and telephone interviews were analysed concurrently and no differences in themes were identified.

Table 1. Development of themes in framework analysis

| A priori themes  | Emergent themes               | Analytic themes relevant to fatigue      |
|------------------|-------------------------------|------------------------------------------|
| Knowledge of WTR | Opinions of WTR               | Effects of WTR implementation on fatigue |
| Shift patterns   | Work intensity                | Effects of fatigue                       |
| Rotas            | Trainee influence on rotas    | Drivers to working                       |
| Compliance       | Working beyond rostered hours |                                          |

|                           |                                                     |                 |
|---------------------------|-----------------------------------------------------|-----------------|
| Educational opportunities | Rostered hours and access to learning opportunities | over hours      |
| Monitoring process        | Commitment to patients                              | Professionalism |
| Personal effects          | Commitment to colleagues                            | Culture         |
|                           | Expectations of colleagues                          |                 |
|                           | Monitoring and professionalism                      |                 |
|                           | Relationships with seniors                          |                 |
|                           | Fatigue                                             |                 |

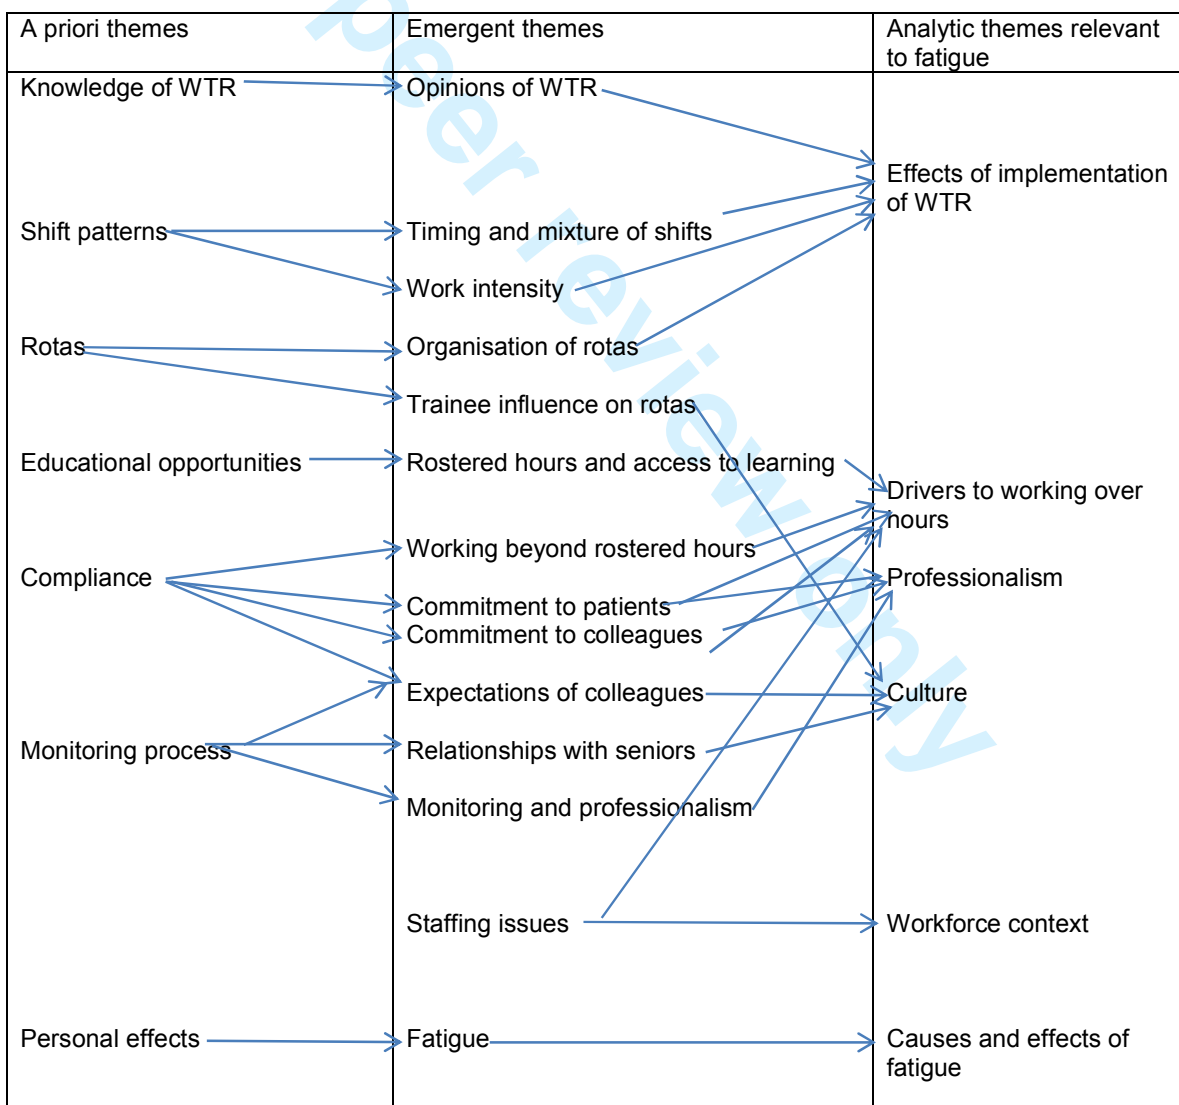

## Findings

Eleven focus groups and 30 telephone interviews were conducted with 82 junior doctors.

See Table 2 for details of the training grades of participants.

Table 2. Training grades of participants

| Foundation Year 1 (FY1)       | Foundation Year 2 (FY2) | Core or specialty training up to CT/ST3* | ST4 or higher ** |
|-------------------------------|-------------------------|------------------------------------------|------------------|
| 40                            | 13                      | 7                                        | 22               |
| Total Foundation trainees: 53 |                         | Total specialty trainees: 29             |                  |

\* These are trainees in the first three years of their specialty training, and were likely to have started specialty training after the WTR introduction in 2009.

\*\* These are in higher specialty training, in their fourth year or above.

Thirty-six participants were male and 46 were female. Specialty trainee participants were training in a wide range of medical and surgical specialties, and psychiatry.

### Perceived effects of WTR on working hours

There was general agreement that working hours were much improved under the WTR, and that intended benefits in terms of reduced trainee fatigue and improved work-life balance had been achieved to some extent. Many trainees felt that the 48-hour limit was appropriate and enabled sufficient training experience, albeit with a perceived lack of flexibility.

*"I think, speaking to people who didn't have the forty-eight hour working time directive thing, we get a lot more time to go home and enjoy ourselves and be outside the hospital than they ever did and I think that's a good thing, I feel like I've got a bit more of a life."* (Tel. Int. 22, Foundation)

However, some participants did report still working long hours and experiencing fatigue despite the 48-hour limit and this was found to be related to a number of factors including the

1  
2  
3 way in which the Regulations were implemented and other organisational and contextual  
4  
5 factors.

6  
7  
8 **Effects of WTR implementation on fatigue** Implementation of WTR in practice: effects on  
9 fatigue

10  
11 However, some participants did report still working long hours and experiencing fatigue  
12 despite the 48-hour limit and this was found to be related to a number of factors including the  
13 way in which the Regulations were implemented and other organisational and contextual  
14 factors.  
15  
16  
17  
18

19  
20 The WTR have not entirely eliminated long hours, with some trainees giving examples of  
21 working up to 100 hours in a week. However, fatigue did not necessarily arise just from the  
22 long hours worked, but also the organisation of work within those hours, for example the  
23 mixture of day and night shifts, and long shifts straddling day and night (e.g. 2.00pm to  
24 2.00am). Rotas could involve five consecutive days at work with 13-hour shifts, and working  
25 up to 12 consecutive days or, for some, seven consecutive nights (despite Royal College  
26 recommendations to the contrary). Trainees reported that averaging meant that a working  
27 week could exceed 70 hours and remain compliant.  
28  
29  
30  
31  
32  
33  
34  
35

36  
37  
38 *"I don't think the hours are long, so doing a 12 hour day or 13 hour day is fine, I think*  
39 *doing 12 days in a row you hit delirium about day ten and then you over-ride it...so I*  
40 *don't think it's the shift I think it's the number of days you work in a row."* (Focus  
41 group 3, Foundation)  
42  
43  
44

45  
46  
47 *"There's no continuity in terms of predictability of, right this is what I'm doing and, for*  
48 *example, my rota you run an eight cycle rota so you've got eight weeks to get*  
49 *through and none of those eight weeks are the same at all, and you jump around with*  
50 *longs and lates in-between and I think that from my side is what creates fatigue."*  
51  
52  
53  
54  
55 (Focus group 10, Specialty)  
56  
57  
58  
59  
60

1  
2  
3 *“That was a particularly difficult shift on the assessment suite because you would go*  
4 *from five long days with maybe two days off, or a day off sometimes, and then onto a*  
5 *period of nights, you are constantly swapping from nights to days which was tiring,*  
6 *and 12 hour shifts and 13 hour shifts were always a bit of a drag.”* (Tel. Int. 22,  
7  
8  
9  
10  
11 Foundation)

12  
13  
14 There was also a perception that twelve-hour shifts were more fatiguing, with less ‘down-  
15 time’ than longer but less intense on-call sessions. Work intensity was also increased by  
16 rotas involving cross-cover out of hours.  
17  
18  
19

20  
21  
22 *“My personal opinion is [the WTR have] actually increased fatigue and stress in the*  
23 *fact that you feel you have to get an increased amount of work done in a shorter*  
24 *amount of time.”* (Tel. Int. 16, Foundation)  
25  
26  
27

28  
29  
30 Provision of facilities for taking rest during a night shift was also being reduced which,  
31 alongside less capacity to take breaks or compensatory rest, added to the fatigue  
32 experienced. Rest periods were also lost in half days – sometimes inserted into rotas to  
33 balance hours – not always being taken, sometimes because senior clinical staff were  
34 unaware of them, so workload did not respond to working hours.  
35  
36  
37  
38  
39

40  
41 *“The trouble with night shift is being able to sleep during the day and most hospitals*  
42 *have no facility to actually catch a nap while on nights. The last time I worked in a*  
43 *hospital with bedrooms for on-call staff was in 2007 and that’s despite guidance from*  
44 *the Royal College of Physicians that it should be possible for someone to have a*  
45 *short nap.”* (Tel. Int. 23, Specialty)  
46  
47  
48  
49  
50

51  
52  
53 *“The difficulty is you may be entitled to various half days but the chances of them*  
54 *actually materialising are very slight...unless these things are really formalised and*  
55 *recognised they just don’t happen. I mean you can just about get your half day off*  
56  
57  
58  
59  
60



1  
2  
3 *before nights because everyone understands that you're about to start nights...but*  
4 *the rest of them just don't happen."* (Tel. Int. 19, Foundation)  
5  
6  
7

8  
9 Fatigue did not just arise from hours specified in rota design. There were many reasons,  
10 including some voluntary, for trainees working beyond their rostered hours.  
11

### 12 13 14 **Drivers to work long hours**

15  
16  
17 Fatigue did not just arise from hours specified in rota design. There were many reasons,  
18 including some voluntary, for trainees working beyond their rostered (scheduled) hours.  
19

20  
21  
22  
23 Some reasons for working longer hours than scheduled stemmed from the capacity to fit  
24 workload into the working period. This was more evident in shift work, where there was a  
25 feeling that incoming doctors in the evening may not have the capacity to perform non-  
26 urgent tasks, so the present doctor would finish those tasks before leaving. In contrast, in  
27 on-call rotas a trainee would simply pass the bleep to the incoming doctor and so have a  
28 cleaner handover.  
29  
30  
31  
32  
33  
34

35  
36  
37 *"You kind of know yourself if I was to leave this work it's only going to be there for me*  
38 *in the morning and there's a ward round in the morning, so I will have to get loads*  
39 *more work handed my way. So you want to get things finished."* (Tel. Int. 2,  
40  
41  
42  
43 Foundation)  
44  
45

46  
47 Other drivers came from missing educational opportunities if trainees did not attend work  
48 outside the rota, including going to work on rostered days off. These opportunities included  
49 attending ward rounds and observing in theatre. While benefits of the WTR for work-life  
50 balance were perceived, there was a sense that some educational activity that had been part  
51 of the 'work' domain was now being taken home. This included portfolio completion and  
52 reading that may have been done in the workplace during slack periods on-call.  
53  
54  
55  
56  
57  
58  
59  
60

1  
2  
3 *“If you haven’t got enough time to eat or go to the toilet, you can’t leave work on time,*  
4 *then you definitely don’t have time to go to clinics, you definitely don’t have time to do*  
5 *audits or anything like that during work, it basically means that anything that is*  
6 *exclusively for your own training is basically done in your own time and the amount of*  
7 *time available to you is really diminished.” (Tel. Int. 7, Specialty)*  
8  
9  
10  
11  
12

13  
14 Although this increased their working hours and reduced time for rest and recuperation, the  
15 benefit of taking up such opportunities was often seen to outweigh this.  
16  
17

18  
19  
20 *“I’ve got no problems with the fact that I work a little bit over and take the extra time*  
21 *to get training opportunities and that increases my hours to get better at my job.*  
22 *That’s personal sacrifice, personal advancement type stuff to get a better job to*  
23 *become a consultant.” (Focus group 11, Specialty)*  
24  
25  
26  
27  
28

29  
30 There were also professional and cultural reasons for working beyond rostered hours. These  
31 related to the expectations and norms perceived among their professional group and the  
32 workplace. Trainee doctors often worked beyond rostered hours due to a sense of  
33 commitment and responsibility, both to patients and to colleagues. There were cases of  
34 trainees staying late to hand over the care of a patient, rather than force two handovers (for  
35 example where a junior doctor would stay to complete an admission in A&E, rather than  
36 hand over to another FY2 doctor, who would then have to hand over to the specialty where  
37 the patient was being admitted), due to concern for continuity of care and the risk of  
38 information being lost. There was also a strong sense of collegiality, expressed as a  
39 responsibility not to burden colleagues with routine tasks particularly as they were likely to  
40 face other immediate demands at the handover time.  
41  
42  
43  
44  
45  
46  
47  
48  
49  
50  
51

52  
53 *“We have just never taken the half days because we’re so busy, you know; we could*  
54 *have done, but would have screwed over our colleagues.” (Focus group 2,*  
55 *Foundation)*  
56  
57  
58  
59  
60

1  
2  
3 At times, however, this could be perceived as a cultural expectation that some jobs would  
4 not be left – so less a choice, more an imposition. There were references to a negative  
5 culture where trainees could experience pressure from senior doctors, and other  
6 professions, to stay beyond their rostered hours, with implication of unprofessionalism if they  
7 left on time. There was also a perception amongst trainees that their professional reputation  
8 was at risk, with implications for an employment reference and future career.  
9  
10  
11  
12  
13  
14

15  
16 Concerns about working hours were often not recognised or appreciated by seniors, with  
17 some respondents identifying a dismissive attitude towards the WTR, and a feeling that such  
18 limitations were counter to medical professionalism. Some trainees also agreed that limited  
19 hours undermined professional autonomy, a feeling exacerbated if hours were enforced  
20 during the periodic two-week monitoring process.  
21  
22  
23  
24  
25  
26

27  
28 *“If you clicked that you started at 8.00 and you were meant to start at 9.00, you had*  
29 *to explain...why did you do it, so quite a lot of the time I wouldn't put down that I*  
30 *started before 9.00 because I knew I was going to have to justify that I came in*  
31 *before 9.00.”* (Focus group 5, Foundation)  
32  
33  
34  
35  
36

37  
38 Trainees reported that, as WTR compliance is derived from these New Deal monitoring  
39 reports, there was no objective record of hours worked, and there were also no formal  
40 measures for health and well-being. However, few trainees kept their own record of hours  
41 worked. Despite their being conscious of working beyond rostered hours., few trainees kept  
42 their own record of hours worked. This was partly due to their view of medicine and the  
43 nature of their work, meaning that working to limited hours was not an issue to them.  
44  
45  
46  
47  
48  
49

50  
51 *“We are treated usually like we are working late due to our own failings which is not a*  
52 *nice atmosphere to work in, I think it's very important that you feel you are working,*  
53 *especially as a junior in a new career, you're working somewhere you are*  
54 *appreciated, valued and not being looked at suspiciously.”* (Tel. Int. 21, Foundation)  
55  
56  
57  
58  
59  
60

1  
2  
3 Gaps in rotas also placed additional pressure on the system, and so on individual doctors.  
4  
5 These arose from staff shortages caused by under-recruitment, as well as absences. This  
6  
7 often meant providing informal cover, for example in extended shifts. While locums were  
8  
9 used, external locums were felt to be sometimes unreliable, meaning last minute cover was  
10  
11 often necessary. Formal internal locum shifts were sometimes used, and cross-referenced  
12  
13 against rotas to ensure an individual did not exceed WTR hours, and there was no reported  
14  
15 pressure to undertake locum shifts. The trainees reported that there was a shortage of  
16  
17 available doctors to fill rotas, even without the need to comply with the WTR. Some trainees  
18  
19 felt that even fully staffed rotas would be stretched because the workload had increased  
20  
21 since the staffing levels were initially put in place.  
22  
23

24  
25 *“The fundamental issue is trying to do a decent job and you can’t do a decent job if*  
26  
27 *there aren’t enough of you on the ground, so you are always working many hours in*  
28  
29 *excess of what you should be doing, you end up tired and exhausted and jaded and*  
30  
31 *then you’re not doing a good job for your patient.”* (Tel. Int. 29, Foundation)  
32  
33

### 34 **Effects of fatigue**

35  
36  
37 Trainees identified effects of fatigue arising from their working hours. While detriments to  
38  
39 their skills and judgement were identified, these were mostly felt to affect efficiency rather  
40  
41 than safety – however risks to patient safety cannot be discounted. Some reported that  
42  
43 fatigue affected their ability to retain new information.  
44  
45

46  
47 *“I think when you were getting to the end of a thirteen hour shift you found that your*  
48  
49 *technical skills, like your ability to put a cannula into someone and stuff like that, it*  
50  
51 *certainly decreases, I find it gets a lot harder to do things that require more*  
52  
53 *concentration, things like that, but I think you’re also quite aware of that, so patient*  
54  
55 *safety wise you are aware that you are not at your best so you often check more of*  
56  
57 *your decisions with other people and things like that.”* (Tel. Int. 22, Foundation)  
58  
59  
60

1  
2  
3 *"I think 12 days in a stretch is too long without a day off, I just think it's a really long*  
4 *stretch...I think [the effect] is fatigue really and I suppose you learn less towards the*  
5 *end of those days really because you are just tired."* (Tel. Int. 26, Foundation)  
6  
7  
8

9  
10 Fatigue was also reported to affect mood, particularly when switching between different  
11 working patterns, with consequences for their professional manner. This may have  
12 consequences for team-working and interprofessional communication, as well as for  
13 interactions with patients.  
14  
15  
16

17  
18  
19 *"You become more irritable sometimes as well, I noticed I was a bit more snappy*  
20 *[when switching between long days and nights]* (Focus group 5, Foundation)  
21  
22

23  
24 *"You don't make as good decisions and you're more grumpy, you're less likely to be*  
25 *good with the patients, you know, you're more likely to just go in there and take the*  
26 *blood rather than actually you know being a doctor to them...so you have to be a lot*  
27 *more careful when you're tired I suppose."* (Tel. Int. 9, Foundation)  
28  
29  
30  
31  
32

33  
34 These issues were sometimes compounded by hunger and discomfort arising from not  
35 achieving rest breaks during long shifts.  
36  
37

38  
39 *"I think when I'm hungry my fuse is shorter and I think my compassion towards others*  
40 *is not as what it should be."* (Tel. Int. 2, Foundation)  
41  
42  
43

44  
45 A summary of the Findings is presented in Table 3 below.  
46  
47

48 Table 3. Summary of findings  
49

| Overall findings                                      | Detail of findings                                                                                                                                                                     |
|-------------------------------------------------------|----------------------------------------------------------------------------------------------------------------------------------------------------------------------------------------|
| Perceived effects of WTR on working hours             | General agreement that working hours were much improved under WTR; 48-hour limit appropriate (but desire for greater flexibility); intended benefits achieved to some extent           |
| Implementation of WTR in practice: effects on fatigue | Different shift systems and patterns of work (timing and adjustment).<br>Long periods without a day off.<br>Averaging over 26 weeks can still allow over 48 working hours in one week. |

|                            |                                                                                                                                                                                                                                                                                                 |
|----------------------------|-------------------------------------------------------------------------------------------------------------------------------------------------------------------------------------------------------------------------------------------------------------------------------------------------|
|                            | Work compression/work intensity.<br>Rest periods not always taken.                                                                                                                                                                                                                              |
| Drivers to work long hours | Workload/completion of tasks.<br>Taking up educational opportunities at work.<br>Taking work home.<br>Commitment and responsibility to patients and colleagues; collegiality.<br>Cultural expectations.<br>Professional reputation.<br>Views of nature of professionalism.<br>Workforce issues. |
| Effects of fatigue         | Detriment to skills and judgement: most felt to affect efficiency rather than safety.<br>Negative effect on ability to retain new information.<br>Mood and manner (compounded by physical discomfort and hunger)                                                                                |

## Discussion

Despite the introduction of restricted working hours for junior doctors in the UK, long hours and fatigue remain, with associated consequences for performance. There was general agreement that restricting working hours was a positive thing, but that problems remained with acute workload in some working patterns. Conversely, while most felt that a 48 hour limit was appropriate, some would like more flexibility to exceed it when necessary.

It was considered that the amount of work to be carried out had not reduced, increasing the perceived intensity of work. Some working patterns were considered particularly intense and detrimental to personal well-being – with consequences for performance and education.

Long periods without a day off in particular were tiring. There is no objective record of hours worked, as WTR compliance is derived from New Deal monitoring reports, and trainees reported no formal measures for health and well-being.

There was evidence that the design of rotas was not the only factor working against well-being. Trainees were often working beyond their rostered hours for voluntary reasons of workload, perceived need to gain educational opportunities, and collegiality, but also for more external reasons such as the expectations of others and gaps in the rota. Notably these are corollaries of the voluntary reasons – rota gaps increase workload, and adverse cultures may define professional practice. Contrary to recent recommendations that ‘every

1  
2  
3 moment count' towards education in the workplace,<sup>42</sup> for some trainees at least there is  
4 increasing separation between work and education, and an increase in work intensity that  
5 may be adding new stresses to the trainee population.  
6  
7  
8  
9

10 The current study provides evidence that three years after the implementation of the WTR,  
11 and with rotas that are at least compliant on paper, fatigue remains an issue for doctors in  
12 training. This reflects some findings in the literature that a reduction in working hours alone is  
13 not enough. The issue of increased work intensity and greater stress was noted amongst US  
14 residents when working hours were further restricted.<sup>43</sup> Performing the same amount of work  
15 in fewer hours (work compression) is of concern regarding workload<sup>44</sup> and overall well-  
16 being,<sup>45</sup> and may place trainee doctors at risk of burnout.<sup>46</sup> Although much of the literature  
17 relating to fatigue comes from the USA where restricted working hours are still much longer  
18 than in Europe (e.g. >24 hour shifts until 2011, or 80-hour weeks), two UK self-report studies  
19 conducted shortly after implementation of the 48-hour working week have highlighted the  
20 effect of different schedules on fatigue, including the negative effect of working seven  
21 consecutive nights, having only one day of rest after night shifts, intervals of less than ten  
22 hours between shifts, and shifts of twelve consecutive days.<sup>30 31</sup> Difficulty achieving naps  
23 during night shifts, and poor provision for naps, has been reported elsewhere.<sup>33</sup> The current  
24 study has identified that fatigue is related to a number of complex issues, including rota  
25 design, but also including contextual issues such as staff shortages and rota gaps, and  
26 broader professional and cultural issues.  
27  
28  
29  
30  
31  
32  
33  
34  
35  
36  
37  
38  
39  
40  
41  
42  
43  
44  
45

46 Cultural issues within healthcare have been found to include fatigue not being taken  
47 seriously, lack of discussion of fatigue issues and lack of support for napping.<sup>47</sup> The culture  
48 of medicine needs to value sleep and appropriate work schedules.<sup>48</sup> Long working hours  
49 may be a symptom of, and contribute to, an adverse culture. Expectations of long hours,  
50 coupled with a lack of their explicit recognition, may be symptomatic of 'institutionalised  
51 disrespect' of workers,<sup>34</sup> which if it is felt to be normal may lead to further dysfunctional  
52  
53  
54  
55  
56  
57  
58  
59  
60

1  
2  
3 behaviours. Culture, particularly at the level of basic underlying assumptions that may  
4 underpin day-to-day work, can be extremely difficult to change.<sup>34 49</sup> In a study of paramedics,  
5 podiatrists and occupational therapists, the working environment has also been found to be  
6 an important factor in encouraging and developing professionalism.<sup>44 50</sup> and sSome trainees  
7 in the current study felt undermined by aspects of the professional and organisational culture  
8 and felt there was a lack of recognition of the extra hours they worked.  
9  
10  
11  
12  
13

14  
15  
16 In other professions and industries the organisation of work, and the professional and  
17 organisational cultures they engender or reinforce (such as a culture of long working hours;  
18 cultural attitudes towards napping), has also been linked to fatigue, performance, safety,  
19 health and well-being. Such professions and industries include nursing,<sup>51</sup> aviation,<sup>52</sup> the  
20 police,<sup>53</sup> truck driving,<sup>54</sup> the shipping industry<sup>55</sup> and the construction industry.<sup>56</sup> It has also  
21 been found, in a study of metropolitan train drivers, that the successful adoption of fatigue  
22 management strategies can be positively or negatively affected by aspects of the  
23 organisational culture, such as altruism and camaraderie.<sup>57</sup> A culture of denial of vulnerability  
24 to stress and the effects of fatigue on performance has been identified in both aviation and  
25 medicine,<sup>58</sup> although one study found this to a lesser extent in aviation.<sup>59</sup>  
26  
27  
28  
29  
30  
31  
32  
33  
34  
35  
36  
37

38 Work hours are closely related to psychosocial work characteristics such as work demands  
39 and autonomy.<sup>60</sup> Optimal amount and quality of workload, and opportunities for control at  
40 work are among the psychosocial criteria identified for a good work environment and good  
41 work organisation, and typically show dependence on national and organisational culture  
42 and values,<sup>61</sup> however individual differences in the desire or need for control need to be  
43 taken into account.<sup>62</sup> High work demands and work intensity, and lack of autonomy (and  
44 particularly a combination of these) have been associated with health problems.<sup>63</sup> In a study  
45 of US nurses, high job demands were associated with greater fatigue when job control was  
46 low.<sup>64</sup> Ability to influence working hours (worktime control) has been associated with fewer  
47  
48  
49  
50  
51  
52  
53  
54  
55  
56  
57  
58  
59  
60



1  
2  
3 subjective health complaints,<sup>65</sup> and with decreased work strain and decreased perceived  
4 stress.<sup>66</sup>  
5  
6  
7

8  
9 The broader cultural issues identified in relation to trainees' professional autonomy and the  
10 relationship between trainees and their seniors are of current relevance in light of the Francis  
11 report's recommendations for fundamental culture change in the NHS.<sup>4567</sup> Following these  
12 recommendations, it has been argued that more sophisticated understandings of cultural  
13 dynamics and the role of policy in shaping these may be needed.<sup>4668</sup> Fatigue may be an  
14 important mediating variable in the perpetuation of adverse cultures and practice failings,  
15 and as such should be an important component of any policies to monitor and improve  
16 workplace cultures.  
17  
18  
19  
20  
21  
22  
23

24  
25 Evaluation of the WTR must be considered in relation to the historical context within which  
26 they were implemented. Perceptions of the WTR were not isolated from other changes  
27 affecting working hours, particularly the 1991 New Deal for Junior Doctors, which imposed  
28 restrictions for the first time. At an organisational level, changes relating to the reorganisation  
29 of specialty training over the last 20 years<sup>4769</sup> affected the working environment. Trainees  
30 now have to settle on a career specialty training path sooner, meaning that the Senior House  
31 Officer (SHO) posts they would have filled in other specialties for up to several years may  
32 remain unfilled. These gaps are compounded by the reduction in the number of overseas-  
33 qualified doctors entering the UK following changes to immigration policy in 2008. The  
34 workload and hence fatigue experienced by individual trainees can therefore be seen as the  
35 end-point of many contributory factors.  
36  
37  
38  
39  
40  
41  
42  
43  
44  
45  
46  
47

### 48 49 **Strengths and limitations**

50  
51 The strength of the current study is the breadth of trainee participants, covering a range of  
52 training grades and specialties and all four nations of the UK, so gaining a picture across the  
53 trainee experience. A weakness is that the trainee participants were volunteers to the study,  
54 and as such may be open to self-selection bias. However, this risk is mitigated by the  
55  
56  
57  
58  
59  
60

1  
2  
3 instance of one group, run as part of Foundation Programme teaching, where all but four of  
4  
5 a cohort of F1s were able to attend. That group identified the same issues as the wider  
6  
7 sample, suggesting the prevalence of the concerns identified is not limited to a particularly  
8  
9 engaged sample. There may also be some instances of inaccuracy in individual recall  
10  
11 regarding the exact hours trainees worked.  
12

### 13 14 **Conclusion**

15  
16  
17 The WTR have reduced the hours junior doctors work, but have not fully addressed  
18  
19 problems of fatigue and stress, due to issues in their implementation and other contextual  
20  
21 factors. The long term risks of this continued stress and fatigue, for the doctors themselves  
22  
23 and for the effective delivery of a healthcare service, should not be ignored.  
24

25  
26  
27 Future research could usefully involve an investigation of work intensity and its effects on  
28  
29 doctors' education, performance and well-being, and its impact on patient care. Such  
30  
31 research should consider the clinical demands of different specialties and the working  
32  
33 environment. Policy and practice could consider how best to monitor both working hours and  
34  
35 doctors' well-being. The closer and more effective involvement of trainees in rota design,  
36  
37 with consideration of the physiological aspects of sleep and fatigue, may help to avoid some  
38  
39 stresses, but there may need to be more fundamental consideration of necessary staffing  
40  
41 levels.  
42

### 43 44 **Acknowledgements**

45  
46  
47 This research was funded by the General Medical Council. The authors also thank all the  
48  
49 trainee doctors who took part in focus groups or telephone interviews.  
50  
51  
52  
53  
54  
55  
56  
57  
58  
59  
60

**Contributors and sources:**

This article draws on research commissioned by the UK General Medical Council, designed by GM and BB, and conducted by all authors. All four authors were members of the Centre for Medical Education Research, Durham University, UK, when this research was carried out. All authors contributed to the analysis and writing of the report and the writing of this article, and approved the final version. GM is guarantor of the article.

**Competing interests:** We have read and understood the BMJ Group policy on declaration of interests and have no relevant interests to declare.

**Licence:** The Corresponding Author has the right to grant on behalf of all authors and does grant on behalf of all authors, an exclusive licence on a worldwide basis to the BMJ Publishing Group Ltd, and its Licensees, to permit this article (if accepted) to be published in *BMJ Open* and any other BMJ PGL products and to exploit all subsidiary rights, as set out in our licence.

**References**

1. Morrow G, Burford B, Carter M, *et al.* *The Impact of the Working Time Regulations on medical education and training: Literature review.* Report to the GMC, August 2012.  
[http://www.gmc-uk.org/The\\_Impact\\_of\\_the\\_Working\\_Time\\_Regulations\\_on\\_Medical\\_Education\\_and\\_Training\\_\\_\\_Literature\\_Review.pdf\\_51155615.pdf](http://www.gmc-uk.org/The_Impact_of_the_Working_Time_Regulations_on_Medical_Education_and_Training___Literature_Review.pdf_51155615.pdf)
2. Ayas NT, Barger LK, Cade BE, *et al.* Extended work duration and the risk of self-reported percutaneous injuries in interns. *JAMA* 2006;296:1055-62.
3. Fisman DN, Harris AD, Rubin M, *et al.* Fatigue increases the risk of injury from sharp devices in medical trainees: results from a case-crossover study. *Infect Cont Hosp Ep* 2007;28:10-17.

- 1  
2  
3 4. Barger LK, Ayas NT, Cade BE, *et al.* Impact of extended-duration shifts on medical  
4 errors, adverse events, and attentional failures. *PLOS Med* 2006;3:e487.
- 5  
6  
7 5. Gander P, Purnell H, Garden A, *et al.* Work patterns and fatigue-related risk among  
8 junior doctors. *Occup Environ Med* 2007;64:733-738.
- 9  
10  
11 6. Kohen-Raz R, Himmelfarb M, Tzur S, *et al.* An initial evaluation of work fatigue and  
12 circadian changes as assessed by multiplate posturography. *Percept Motor Skill*  
13 1996;82:547-557.
- 14  
15  
16  
17 7. Parshuram CS, Dhanani S, Kirsh JA, *et al.* Fellowship training, workload, fatigue and  
18 physical stress: A prospective observational study. *Can Med Assoc J* 2004;170:965-970.
- 19  
20  
21 8. Smith AM, Morris P, Rowell KO, *et al.* Junior doctors and the full shift rota - psychological  
22 and hormonal changes: a comparative cross-sectional study. *Clin Med* 2006;6:174-177.
- 23  
24  
25 9. Block L, Wu AW, Feldman L, *et al.* Residency schedule, burnout and patient care among  
26 first-year residents. *Postgrad Med J* 2013;89:495-500.
- 27  
28  
29 10. Gohar A, Adams A, Gertner E, *et al.* Working memory capacity is decreased in sleep-  
30 deprived internal medicine residents. *J Clin Sleep Med* 2009;5:191-197.
- 31  
32  
33 11. Lockley SW, Cronin JW, Evans EE, *et al.* Effect of reducing interns' weekly work hours  
34 on sleep and attentional failures. *New Engl J Med* 2004;351:1829-1837.
- 35  
36  
37 12. Jakubowicz DM, Price EM, Glassman HJ, *et al.* Effects of a twenty-four hour call period  
38 on resident performance during simulated endoscopic sinus surgery in an Accreditation  
39 Council for Graduate Medical Education-compliant training program. *Laryngoscope*  
40 2005;115:143-146.
- 41  
42  
43 13. Gander P, Millar M, Webster C, *et al.* Sleep loss and performance of anaesthesia  
44 trainees and specialists. *Chronobiol Int* 2008; 25:1077-1091.
- 45  
46  
47 14. Brandenberger J, Kahol K, Feinstein AJ, *et al.* Effects of duty hours and time of day on  
48 surgery resident proficiency. *Am J Surg* 2010;200:814-818.
- 49  
50  
51 15. Ellman PI, Law MG, Tache-Leon C, *et al.* Sleep deprivation does not affect operative  
52 results in cardiac surgery. *AnnThorac Surg* 2004;78:906-911.
- 53  
54  
55  
56  
57  
58  
59  
60

- 1  
2  
3 16. Lehmann KS, Martus P, Little-Elk S, *et al.* Impact of sleep deprivation on medium-term  
4 psychomotor and cognitive performance of surgeons: prospective cross-over study with  
5 a virtual surgery simulator and psychometric tests. *Surgery* 2010;147:246-254.  
6  
7  
8  
9 17. Grantcharov TP, Bardram L, Funch-Jensen P, *et al.* Laparoscopic performance after one  
10 night on call in a surgical department: prospective study. *Brit Med J* 2001;323:1222-3.  
11  
12  
13 18. Landrigan CP, Rothschild JM, Cronin JW, *et al.* Effects of reducing interns' work hours  
14 on serious medical errors in intensive care units. *New Engl J Med* 2004;351:1838-1848.  
15  
16  
17 19. Lockley SW, Landrigan CP, Barger LK, *et al.* Harvard Work Hours, Health Safety Group.  
18 When policy meets physiology: the challenge of reducing resident work hours. *Clin*  
19 *Orthop Relat R* 2006;449:16-127.  
20  
21  
22 20. Majekodunmi A, Landrigan CP. The effect of physician sleep deprivation on patient  
23 safety in perinatal-neonatal medicine. *Am J Perinat* 2012;29:43-48.  
24  
25  
26 21. Vorona RD, Chen IA, Ware JC. Physicians and sleep deprivation. *Sleep Medicine Clinics*  
27 2009;4:527-540.  
28  
29  
30 22. Paice E, Hamilton-Fairley D. Avoiding burnout in new doctors: sleep, supervision and  
31 teams. *Postgrad Med J* 2013;89:493.  
32  
33  
34 23. Sokol DK. Waking up to the effects of fatigue in doctors. *Brit Med J* 2013;347:f4906  
35  
36  
37 24. Conigliaro J, Frishman WH, Lazar EJ, *et al.* Internal medicine housestaff and attending  
38 physician perceptions of the impact of the New York State Section 405 regulations on  
39 working conditions and supervision of residents in two training programs. *J Gen Intern*  
40 *Med* 1993; 8:502-507.  
41  
42  
43 25. Kort KC, Pavone LA, Jensen E, *et al.* Resident perceptions of the impact of work-hour  
44 restrictions on health care delivery and surgical education: time for transformational  
45 change. *Surgery* 2004;136:861-871.  
46  
47  
48 26. Kiernan M, Civetta J, Bartus C, *et al.* 24 hours on-call and acute fatigue no longer  
49 worsen resident mood under the 80-hour work week regulations. *Curr Surg* 2006;63:237-  
50 241.  
51  
52  
53  
54  
55  
56  
57  
58  
59  
60

- 1  
2  
3 27. Cull WL, Mulvey HJ, Jewett EA, *et al.* Pediatric residency duty hours before and after  
4 limitations. *Pediatrics* 2006;118:e1805-1811.  
5  
6  
7 28. Reddy R, Guntupalli K, Alapat P, *et al.* Sleepiness in medical ICU residents. *Chest*  
8  
9 2009;135:81-85.  
10  
11 29. Berios I, Surani S, Simmons M. Assessing reaction time among emergency medicine  
12 residents working different shift hours. *Ann Emerg Med* 2009; 54: S35.  
13  
14 30. Brown M, Tucker P, Rapport F, *et al.* The impact of shift patterns on junior doctors'  
15 perceptions of fatigue, training, work/life balance and the role of social support. *Qual Saf*  
16  
17 *Health Care* 2010;19:e36.  
18  
19 31. Tucker P, Brown M, Dahlgren A, *et al.* The impact of junior doctors' worktime  
20  
21 arrangements on their fatigue and well-being. *Scand J Work Env Hea* 2010;36:458-46  
22  
23 32. Arora V, Dunphy C, Chang VY, *et al.* The effects of on-duty napping on intern sleep time  
24  
25 and fatigue. *Ann Intern Med* 2006;144:792-798.  
26  
27 33. Jackson EJ, Moreton A. Safety during night shifts: a cross-sectional survey of junior  
28  
29 doctors' preparation and practice. *BMJ Open* 2013 3: doi: 10.1136/bmjopen-2013-  
30  
31 003567.  
32  
33 34. Leape LL, Shore MF, Dienstag JL, *et al.* A culture of disrespect, Part 1: The nature and  
34  
35 causes of disrespectful behavior by physicians. *Acad Med* 2012;87:845-852.  
36  
37 35. O'Gallagher MK, Lewis G, Mercieca K, *et al.* The impact of the European Working Time  
38  
39 Regulations on Ophthalmic Specialist Training - A national trainee survey. *Int J Surg*  
40  
41 2013: <http://dx.doi.org/10.1016/j.ijsu.2013.08.007>  
42  
43 36. Illing JC, Carter M, Thompson NJ, *et al.* *Evidence synthesis on the occurrence, causes,*  
44  
45 *consequences, prevention and management of bullying and harassing behaviours to*  
46  
47 *inform decision making in the NHS. Final report.* NIHR Service Delivery and Organisation  
48  
49 programme; 2013.  
50  
51 37. Williams ES, Konrad TR, Scheckler WE, *et al.* Understanding physicians' intentions to  
52  
53 withdraw from practice: the role of job satisfaction, job stress, mental and physical  
54  
55 health. *AHCM* 2001;2:243-262.  
56  
57  
58  
59  
60

- 1  
2  
3 38. Edwards N, Kornacki MJ, Silversin J. Unhappy doctors: what are the causes and what  
4 can be done? *Brit Med J* 2002;324:835-8.  
5  
6  
7 39. Visser MRM, Smets EMA, Oort FJ, *et al.* Stress, satisfaction and burnout among Dutch  
8 medical specialists. *CMAJ* 2003;168:271-5.  
9  
10  
11 40. Morrow G, Burford B, Carter M, *et al.* *The Impact of the Working Time Regulations on*  
12 *medical education and training: Final report on primary research.* Report to the GMC,  
13 August 2012. [http://www.gmc-](http://www.gmc-uk.org/The_Impact_of_the_Working_Time_Regulations_on_Medical_Education_and_Training_Final_Report_on_Primary_Research.pdf_51157039.pdf)  
14 [uk.org/The\\_Impact\\_of\\_the\\_Working\\_Time\\_Regulations\\_on\\_Medical\\_Education\\_and\\_Tr](http://www.gmc-uk.org/The_Impact_of_the_Working_Time_Regulations_on_Medical_Education_and_Training_Final_Report_on_Primary_Research.pdf_51157039.pdf)  
15 [aining\\_Final\\_Report\\_on\\_Primary\\_Research.pdf\\_51157039.pdf](http://www.gmc-uk.org/The_Impact_of_the_Working_Time_Regulations_on_Medical_Education_and_Training_Final_Report_on_Primary_Research.pdf_51157039.pdf)  
16  
17  
18  
19  
20  
21 41. Ritchie J, Spencer L. Qualitative data analysis for applied policy research. In: Bryman A,  
22 Burgess RG, editors. *Analysing Qualitative Data.* London: Routledge; 1994. p.173-194.  
23  
24  
25 42. Temple J. Time for Training: A review of the impact of the European Working Time  
26 Directive on the quality of training. 2010.  
27  
28 [http://www.mee.nhs.uk/pdf/JCEWTD\\_Final%20report.pdf](http://www.mee.nhs.uk/pdf/JCEWTD_Final%20report.pdf)  
29  
30  
31 43. Auger KA, Sieplinga KR, Simmons JM, *et al.* Failure to thrive: Pediatric residents weigh  
32 in on feasibility trial of the proposed 2008 Institute of Medicine work hour restrictions. *J*  
33 *Grad Med Educ* 2009;1:181-184.  
34  
35  
36  
37 44. Goitein L. Resident workload – Let’s treat the disease, not just the symptom. *JAMA*  
38 *Intern Med* 2013;173:655-656.  
39  
40  
41 45. Auger KA, Landrigan CP, Gonzalez del Ray JA, *et al.* Better rested but more stressed?  
42 Evidence of the effects of resident work hour restrictions. *Acad Pediatr* 2012;12:335-343.  
43  
44  
45  
46 46. Wayne DB, Arora V. Resident duty hours and the delicate balance between education  
47 and patient care. *J Gen Intern Med* 2008;23:1120-1121.  
48  
49  
50 47. Ferguson SA, Neall A, Dorrian J. Strategies used by healthcare practitioners to manage  
51 fatigue-related risk: beyond work hours. *Medical Sociology online* 2013;7:24-33.  
52  
53 <http://www.medsoconline.org/>  
54  
55  
56 48. Buysse DJ, Barzansky B, Dinges D, *et al.* Sleep, fatigue, and medical training: setting an  
57 agenda for optimal learning and patient care. A report from the Conference “Sleep,  
58  
59  
60



- 1  
2  
3 fatigue and medical training: Optimizing learning and the patient care environment".  
4  
5 *Sleep* 2003;2:218-225.  
6
- 7 49. Schein EH. Organisational culture and leadership. 4<sup>th</sup> edn. Jossey-Bass, 2010.  
8
- 9 50. Morrow G, Burford B, Rothwell C, *et al.* Carter M, McLachlan J, Illing J. *Professionalism*  
10 *in healthcare professionals. Perceptions of professionalism.* Final report to the hpc,  
11  
12 2011. <http://www.hpc->  
13  
14 [uk.org/assets/documents/10003771Professionalisminhealthcareprofessionals.pdf](http://www.hpc-uk.org/assets/documents/10003771Professionalisminhealthcareprofessionals.pdf)  
15  
16
- 17 51. Rogers AE. The effects of fatigue and sleepiness on nurse performance and patient  
18  
19 safety. In: Hughes RG. editor. *Patient safety and quality: An evidence-based handbook*  
20  
21 *for nurses.* Rockville (MD): Agency for Healthcare Research and Quality (US); 2008.p2-  
22  
23 509-2-533.  
24
- 25 52. Gregory KB, Winn W, Johnson K, *et al.* Pilot fatigue survey: Exploring fatigue factors in  
26  
27 air medical operations. *Air Med J* 2010;29:309-319.  
28
- 29 53. Vila B. Impact of long work hours on police officers and the communities they serve. *Am*  
30  
31 *J Ind Med* 2006;49:972-980.  
32
- 33 54. Sabbagh-Ehrlich S, Friedman L, Richter E. Working conditions and fatigue in  
34  
35 professional truck drivers at Israeli ports. *Inj Prev* 2005;11:110-114.  
36
- 37 55. Xhelilaj E, Lapa K. The role of human fatigue factor towards maritime casualties.  
38  
39 *Maritime Transport & Navigation Journal* 2010;2:23-32.  
40
- 41 56. Dong X. Long workhours, work scheduling and work-related injuries among construction  
42  
43 workers in the United States. *Scand J Work Environ Health* 2005;31:329-335.  
44
- 45 57. Rainbird S, Thompson K, Dawson D. The impact of organisational culture on fatigue  
46  
47 management: The case of camaraderie amongst metropolitan train drivers. In: Sargent  
48  
49 C, Darwent D, Roach GD. editors. *Living in a 24/7 world: The impact of circadian*  
50  
51 *disruption on sleep, work and health.* Adelaide: Australasian Chronobiology Society;  
52  
53 2010.p.29-33.  
54
- 55 58. Helmreich RL. On error management: lessons from aviation. *Brit Med J* 2000;320:781-  
56  
57 785.  
58  
59  
60



- 1  
2  
3 59. Sexton JB, Thomas EJ, Helmreich RL. Error, stress and teamwork in medicine and  
4 aviation: cross sectional surveys. *Brit Med J* 2000;320:745-749.  
5  
6  
7 60. Härmä M. Workhours in relation to work stress, recovery and health. *Scand J Work*  
8 *Environ Health* 2006;32:502-514.  
9  
10  
11 61. Lindström K. Psychosocial criteria for good work organization. *Scand J Work Environ*  
12 *Health* 1994;20:123-133.  
13  
14  
15 62. Sparks K, Faragher B, Cooper CL. Well-being and occupational health in the 21st  
16 century workplace. *J Occup Organ Psych* 2001;74:489-509.  
17  
18  
19 63. Eurofound. Fifth European working conditions survey. Publications Office of the  
20 European Union, Luxembourg, 2012.  
21  
22 <http://www.eurofound.europa.eu/pubdocs/2011/82/en/1/EF1182EN.pdf>  
23  
24  
25 64. Van Yperen NW, Hagedoorn M. Do high job demands increase intrinsic motivation or  
26 fatigue or both? The role of job control and job social support. *Acad Manage J*  
27 2003;46:339-348.  
28  
29  
30  
31 65. Costa G, Akerstedt T, Nachreiner F, *et al.* Flexible working hours, health, and well-being  
32 in Europe: some considerations from a SALTSA project. *Chronobiol Int* 2004;21:831-  
33 844.  
34  
35  
36  
37 66. Kandolin I, Huida O. Individual flexibility: an essential pre-requisite in arranging shift  
38 schedules for midwives. *J Nurs Manag* 1996;4:213-217.  
39  
40  
41 67. Francis R. *Report of the Mid Staffordshire NHS Foundation Trust public inquiry.*  
42 Stationery Office, 2013.  
43  
44  
45 68. Davies H, Mannion R. Will prescriptions for cultural change improve the NHS? *Brit Med J*  
46 2013;346:f1305.  
47  
48  
49 69. HMSO. Hospital Doctors: Training for the future. The report of the working group on  
50 specialist medical training. HMSO, 1993.  
51  
52  
53  
54  
55  
56  
57  
58  
59  
60

1  
2  
3  
4 **Have restricted working hours reduced junior doctors' experience of fatigue? A**  
5  
6 **qualitative focus group and telephone interview study**  
7  
8

9  
10 Gill Morrow

11 Senior Research Associate

12 Centre for Medical Education Research

13 Durham University

14 Burdon House

15 Leazes Road

16 Durham

17 DH1 1TA

18  
19 Bryan Burford

20 Lecturer in Medical Education

21 School of Medical Sciences Education Development

22 The Medical School

23 Ridley Building 1

24 Newcastle University

25 Newcastle upon Tyne

26 NE1 7RU

27  
28 Madeline Carter

29 Research Fellow

30 Centre for Medical Education Research

31 Durham University

32 Burdon House

33 Leazes Road

1  
2  
3  
4  
5  
6  
7  
8  
9  
10  
11  
12  
13  
14  
15  
16  
17  
18  
19  
20  
21  
22  
23  
24  
25  
26  
27  
28  
29  
30  
31  
32  
33  
34  
35  
36  
37  
38  
39  
40  
41  
42  
43  
44  
45  
46  
47  
48  
49  
50  
51  
52  
53  
54  
55  
56  
57  
58  
59  
60

Durham

DH1 1TA

Jan Illing

Professor in Medical Education

Centre for Medical Education Research

Durham University

Burdon House

Leazes Road

Durham

DH1 1TA

For peer review only

## ABSTRACT

**Objectives:** To explore the effects of the UK Working Time Regulations (WTR) on trainee doctors' experience of fatigue.

**Design:** Qualitative research

**Setting:** Nine deaneries in all four UK nations of the UK; secondary care

**Participants:** Focus groups or telephone interviews were conducted with trainee doctors purposively selected from Foundation Years One and Two and specialty training in the nine deaneries. ~~82~~ **Eighty-two** junior doctors participated: 53 Foundation Programme trainees (40 in Foundation Year 1, 13 in Foundation Year 2) and 29 specialty trainees. Thirty-six participants were male, and 46 were female. Specialty trainee participants were ~~training in~~ **from** a wide range of medical and surgical specialties, and psychiatry.

**Findings:** The implementation of the WTR, whilst acknowledged to be an improvement to the earlier situation of prolonged excessive hours, has not wholly overcome experience of long working hours and fatigue. Fatigue did not just arise from ~~scheduled hours specified in rota design,~~ **but also from an unpredictable mixture of shifts, work intensity, which often resulted in educational tasks being taken home, and inadequate rest. It was also caused by** ~~Trainees working beyond their rota, for rostered hours.~~ **reasons including completing tasks, accessing educational opportunities outside scheduled hours and staffing issues.** ~~including some voluntary, and other~~ **There were also** organisational, professional and cultural ~~and contextual reasons~~ **factors, such as a sense of responsibility to patients and colleagues and the expectations of seniors.** Fatigue was perceived to affect efficiency of skills and judgement, mood, and learning capacity.

1  
2  
3 **Conclusions:** The ~~Long~~ term risks of this continued stress and fatigue, for the doctors  
4 themselves and for the effective delivery of a healthcare service, should not be ignored.  
5  
6 Current monitoring and quality management processes may need to be reviewed to increase  
7 their sensitivity to issues ~~regarding rotas and~~ arising from hours worked. Effects on fatigue  
8 and on education cannot be isolated from other contextual factors, including workforce  
9 issues numbers. On-going attention needs to be paid to broader cultural issues, including for  
10 example in relation to trainees' professional autonomy and the relationship between trainees  
11 and their seniors.  
12  
13  
14  
15  
16  
17  
18  
19  
20  
21  
22  
23  
24  
25  
26  
27  
28  
29  
30  
31  
32  
33  
34  
35  
36  
37  
38  
39  
40  
41  
42  
43  
44  
45  
46  
47  
48  
49  
50  
51  
52  
53  
54  
55  
56  
57  
58  
59  
60

## ARTICLE SUMMARY

### Article focus

The aim of the paper is to explore the effects of the UK Working Time Regulations (WTR) on trainee doctors' experience of fatigue.

### Key messages

- The implementation of the WTR, whilst acknowledged to be an improvement to the earlier situation of prolonged excessive hours, has not wholly overcome experience of long working hours and fatigue. **Reasons for persistent fatigue include the organisation of working patterns, work compression and intensity - thus also taking more work home – and working longer than rostered hours. This was related to taking up extra educational opportunities at work and to professional and organisational culture, including trainees' sense of responsibility towards patients and colleagues and the expectations of seniors. Current monitoring and quality management processes may need to be reviewed to increase their sensitivity to issues regarding rotas and hours worked. Current monitoring processes lack sensitivity to issues regarding rotas and hours worked.**
- Effects on fatigue and on education cannot be isolated from other contextual factors, including workforce issues.
- On-going attention needs to be paid to broader cultural issues identified in relation to trainees' professional autonomy and **expectations placed on trainees and** the relationship between trainees and their seniors.

### Strengths and limitations

- The strength of the study is the breadth of trainee participants, covering a range of training grades and specialties and all four nations of the UK.
- A potential weakness is that participants were volunteers to the study, and as such may be open to self-selection bias. However, this risk is mitigated by the instance of

1  
2  
3 one group run as part of Foundation Programme teaching, where all but four of a  
4 cohort of **Foundation Year One trainees (F1s)** were able to attend. That group  
5 identified the same issues as the wider sample, suggesting the prevalence of the  
6 issues identified is not limited to a particularly engaged sample. **There may also be**  
7 **potential inaccuracies in individual recall of hours worked.**  
8  
9  
10  
11  
12  
13  
14  
15  
16  
17  
18  
19  
20  
21  
22  
23  
24  
25  
26  
27  
28  
29  
30  
31  
32  
33  
34  
35  
36  
37  
38  
39  
40  
41  
42  
43  
44  
45  
46  
47  
48  
49  
50  
51  
52  
53  
54  
55  
56  
57  
58  
59  
60

For peer review only

1  
2  
3 **Title: Have restricted working hours reduced junior doctors' experience of fatigue? A**  
4 **qualitative focus group and telephone interview study**  
5  
6  
7

8 **Introduction**  
9

10  
11  
12 There is a considerable body of evidence recognising that fatigue has adverse physiological,  
13  
14 psychological and cognitive effects and can lead to deficits in performance and safety.<sup>1</sup>

15  
16 Fatigue in doctors is associated with increases of risks to personal safety at work<sup>2 3</sup> and  
17  
18 outside work,<sup>4 5</sup> and risks to health and well-being.<sup>6-9</sup> There is also evidence of detriments to  
19  
20 performance, for example in cognitive abilities<sup>10 11</sup> and psychomotor skills,<sup>12-14</sup> (although  
21  
22 some studies have found no performance effects<sup>15 16</sup>). Fatigue has also been associated  
23  
24 directly with negative consequences for patient safety such as clinical errors and diagnostic  
25  
26 mistakes.<sup>4 5 17-20</sup> This has been a concern in medicine for several years<sup>21</sup> and remains so  
27  
28 today.<sup>22 23</sup> The effects may be compounded by a risk that doctors do not recognise that they  
29  
30 may be subject to adverse effects.<sup>23</sup>  
31  
32

33  
34 Several countries have introduced limits on working hours. For example, in the USA, since  
35  
36 2003, there has been national implementation of an Accreditation Council for Graduate  
37  
38 Medical Education (ACGME) 80-hour resident work week restriction, averaged over four  
39  
40 weeks; however the limit is lower in Europe. The European Working Time Directive (EWTD)  
41  
42 was introduced to limit hours, to address health and safety concerns for all workers arising  
43  
44 from long hours. Each European Union member state implemented the Directive in its own  
45  
46 legislation – the UK as the Working Time Regulations (1998). These Regulations (the WTR)  
47  
48 have applied fully to junior doctors since 2009, with a limit of 48 hours per week, averaged  
49  
50 across a reference period of 26 weeks, alongside specified minimum rest periods. The WTR  
51  
52 are implemented in rotas (**work schedules**) alongside the New Deal, which specifies a  
53  
54 maximum of 56 hours per week, with a system of banded payments.  
55  
56  
57  
58  
59  
60



1  
2  
3 Positive effects of a reduction in working hours have been found in many studies,<sup>24-26</sup> but not  
4 all.<sup>27 28</sup> The effect varies with the precise implementation of restrictions, with fatigue affected  
5 by work patterns including the number of consecutive days or nights worked, the intervals  
6 between shifts, and the timing of shifts (day/evening/night).<sup>29-31</sup> Short naps may ameliorate  
7 the negative effects of fatigue,<sup>32</sup> and awareness of the benefits of naps and other  
8 recommendations and interventions to limit fatigue associated with rotating shift work may  
9 be needed.<sup>33</sup>

10  
11  
12  
13  
14  
15  
16  
17  
18 Organisational cultures of long or antisocial hours<sup>34</sup> may also be a factor impacting on stress  
19 and fatigue, and trainees have reported being unofficially expected to work extra hours  
20 voluntarily.<sup>35</sup> Furthermore workload pressures and poor work design may increase risks of  
21 negative behaviours among staff.<sup>36</sup> Limits on professional autonomy – the amount of control  
22 doctors have traditionally held over their practice – may also increase doctors' stress and  
23 reduce job satisfaction.<sup>37-39</sup>

24  
25  
26  
27  
28  
29  
30  
31  
32 Consequently, simply restricting the number of work hours may be insufficient to address  
33 issues relating to fatigue and its consequences. With this in mind, the question is raised  
34 whether the WTR will have achieved the aim of improving junior doctors' well-being and  
35 fatigue. To date, there has been little research looking directly at the effects of the WTR as  
36 implemented and experienced in practice. This paper draws on a larger research study  
37 considering perceptions of the effects of the WTR,<sup>40</sup> and focuses specifically on their effects  
38 on trainee doctors' fatigue.

## 47 48 **Method**

49  
50  
51 The research was reviewed by the Durham University School of Medicine, Pharmacy and  
52 Health Ethics Sub-Committee, and a favourable ethical opinion received.

53  
54  
55  
56 Focus groups and telephone interviews (with participants who were unable to attend a focus  
57 group) were conducted with Foundation Year One (FY1) and Foundation Year Two (FY2)

1  
2  
3 trainees and specialty trainees, sampled purposively from nine deaneries in all four nations  
4 of the UK. The Foundation Programme is a two-year generic training programme undertaken  
5 after completing medical school, and is followed by specialist or general practice training.  
6  
7 The WTR apply to all years of training in the same way. Trainees were asked about their  
8  
9 experience and perceptions of working hours following the WTR.  
10  
11  
12

13  
14 The focus group topic guide and interview questions focused on perceptions and experience  
15 of working hours following the WTR and any educational or personal impact. Trainees were  
16 asked about their knowledge of the WTR; their perceptions of their working hours in practice,  
17 including shifts, rotas and compliance; issues concerning educational opportunities;  
18 monitoring of working hours, and any personal effects they experienced. Some specialty  
19 trainees had experience of working before the introduction of the WTR, and were asked  
20 about the change.  
21  
22  
23  
24  
25  
26  
27  
28

29 Recruitment was undertaken following local advice; in some cases through the Deanery, in  
30 others through education centres in individual hospitals. An information sheet about the  
31 study was distributed to trainees via email from the Deaneries or individual Trusts, and  
32 participation was on a voluntary basis. Written consent was taken at the start of focus groups  
33 and verbal consent at the start of telephone interviews, including consent for audio  
34 recording. Recordings were later transcribed. GM and BB conducted the focus groups and  
35 telephone interviews. Focus groups lasted between 60 and 90 minutes, and telephone  
36 interviews between 30 and 45 minutes.  
37  
38  
39  
40  
41  
42  
43  
44  
45

## 46 Analysis

47  
48  
49 Data were analysed using a framework approach.<sup>41</sup> An initial stage of familiarisation, with the  
50 data, to gain an overall view of the data, involved reading the transcripts and noting the  
51 range and depth in the data collected. Meetings between all four researchers engaged in this  
52 process (GM, BB, MC, JI) enabled discussion of the concepts and themes that emerged  
53 from the data. A thematic framework was subsequently identified by GM and BB. This  
54  
55  
56  
57  
58  
59  
60

involved identifying the key issues, concepts or themes by which the data could be examined and sorted. The construction of the framework drew upon:

- *a priori* issues - those issues that were known or assumed to be pertinent, that guided the study aims and were developed into the topic guide/interview schedule;
- *emergent* issues - those issues that were raised by the respondents (e.g. issues relating to work intensity);
- *analytic* issues - those themes that emerged from patterns and re-occurrences in the data (e.g. professionalism)

The framework was then applied to the data by GM and BB through indexing and charting, and themes and sub-themes were further refined. Finally, a stage of mapping and interpretation involved bringing the key themes within the data set together and pulling together the findings of the analysis as a whole. Table 1 summarises the main *a priori* themes, emergent themes, and analytic themes related to fatigue and illustrates the mapping and interpretation of the themes. The process of analysis helped provide an explanation of why fatigue remains an issue, and of the inter-relatedness of the issues identified.

~~drawing upon *a priori* issues, *emergent* issues that were raised by respondents (e.g. issues relating to work intensity), and *analytic* issues. — those themes that emerged from patterns and re-occurrences in the data (e.g. professionalism).~~ Data from focus groups and telephone interviews were analysed concurrently and no differences in themes were identified.

Table 1. Development of themes in framework analysis

| A priori themes  | Emergent themes               | Analytic themes relevant to fatigue      |
|------------------|-------------------------------|------------------------------------------|
| Knowledge of WTR | Opinions of WTR               | Effects of WTR implementation on fatigue |
| Shift patterns   | Work intensity                | Effects of fatigue                       |
| Rotas            | Trainee influence on rotas    | Drivers to working                       |
| Compliance       | Working beyond rostered hours |                                          |

|                           |                                                     |                 |
|---------------------------|-----------------------------------------------------|-----------------|
| Educational opportunities | Rostered hours and access to learning opportunities | over hours      |
| Monitoring process        | Commitment to patients                              | Professionalism |
| Personal effects          | Commitment to colleagues                            | Culture         |
|                           | Expectations of colleagues                          |                 |
|                           | Monitoring and professionalism                      |                 |
|                           | Relationships with seniors                          |                 |
|                           | Fatigue                                             |                 |

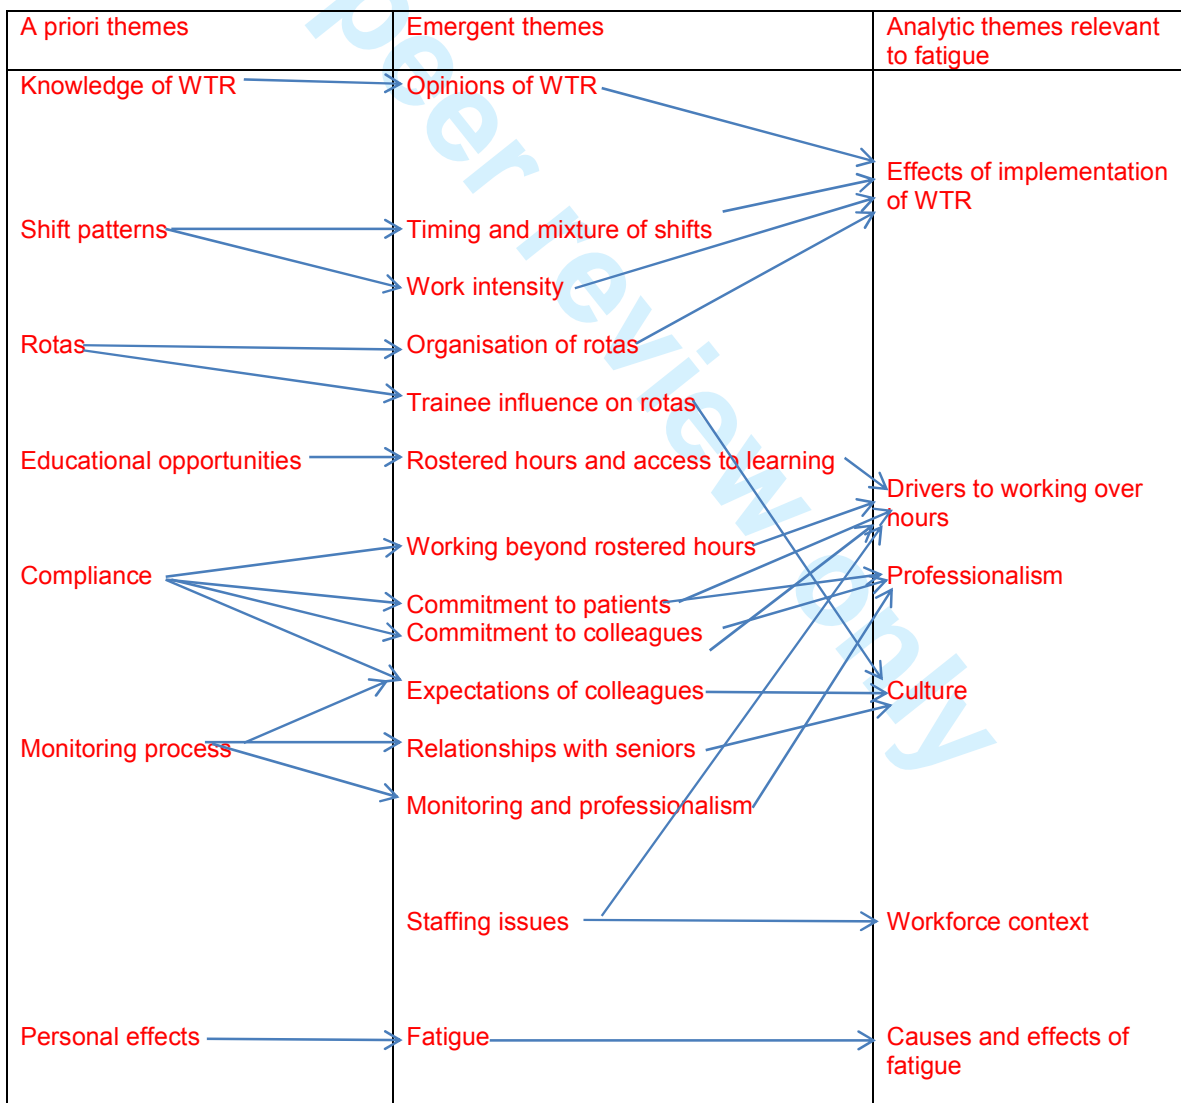

## Findings

Eleven focus groups and 30 telephone interviews were conducted with 82 junior doctors.

See Table 2 for details of the training grades of participants.

Table 2. Training grades of participants

| Foundation Year 1 (FY1)       | Foundation Year 2 (FY2) | Core or specialty training up to CT/ST3* | ST4 or higher ** |
|-------------------------------|-------------------------|------------------------------------------|------------------|
| 40                            | 13                      | 7                                        | 22               |
| Total Foundation trainees: 53 |                         | Total specialty trainees: 29             |                  |

\* These are trainees in the first three years of their specialty training, and were likely to have started specialty training after the WTR introduction in 2009.

\*\* These are in higher specialty training, in their fourth year or above.

Thirty-six participants were male and 46 were female. Specialty trainee participants were training in a wide range of medical and surgical specialties, and psychiatry.

## Perceived effects of WTR on working hours

There was general agreement that working hours were much improved under the WTR, and that intended benefits in terms of reduced trainee fatigue and improved work-life balance had been achieved to some extent. Many trainees felt that the 48-hour limit was appropriate and enabled sufficient training experience, albeit with a perceived lack of flexibility.

*"I think, speaking to people who didn't have the forty-eight hour working time directive thing, we get a lot more time to go home and enjoy ourselves and be outside the hospital than they ever did and I think that's a good thing, I feel like I've got a bit more of a life."* (Tel. Int. 22, Foundation)

However, some participants did report still working long hours and experiencing fatigue despite the 48-hour limit and this was found to be related to a number of factors including the

1  
2  
3 way in which the Regulations were implemented and other organisational and contextual  
4  
5 factors.

6  
7  
8 ~~Effects of WTR implementation on fatigue~~ Implementation of WTR in practice: effects on  
9 fatigue

10  
11 However, some participants did report still working long hours and experiencing fatigue  
12  
13 despite the 48-hour limit and this was found to be related to a number of factors including the  
14  
15 way in which the Regulations were implemented and other organisational and contextual  
16  
17 factors.  
18

19  
20 The WTR have not entirely eliminated long hours, with some trainees giving examples of  
21  
22 working up to 100 hours in a week. However, fatigue did not necessarily arise just from the  
23  
24 long hours worked, but also the organisation of work within those hours, for example the  
25  
26 mixture of day and night shifts, and long shifts straddling day and night (e.g. 2.00pm to  
27  
28 2.00am). Rotas could involve five consecutive days at work with 13-hour shifts, and working  
29  
30 up to 12 consecutive days or, for some, seven consecutive nights (despite Royal College  
31  
32 recommendations to the contrary). Trainees reported that averaging meant that a working  
33  
34 week could exceed 70 hours and remain compliant.  
35

36  
37  
38 *"I don't think the hours are long, so doing a 12 hour day or 13 hour day is fine, I think*  
39  
40 *doing 12 days in a row you hit delirium about day ten and then you over-ride it...so I*  
41  
42 *don't think it's the shift I think it's the number of days you work in a row."* (Focus  
43  
44 group 3, Foundation)

45  
46  
47 *"There's no continuity in terms of predictability of, right this is what I'm doing and, for*  
48  
49 *example, my rota you run an eight cycle rota so you've got eight weeks to get*  
50  
51 *through and none of those eight weeks are the same at all, and you jump around with*  
52  
53 *longs and lates in-between and I think that from my side is what creates fatigue."*  
54  
55 (Focus group 10, Specialty)  
56  
57  
58  
59  
60

1  
2  
3 *“That was a particularly difficult shift on the assessment suite because you would go*  
4 *from five long days with maybe two days off, or a day off sometimes, and then onto a*  
5 *period of nights, you are constantly swapping from nights to days which was tiring,*  
6 *and 12 hour shifts and 13 hour shifts were always a bit of a drag.”* (Tel. Int. 22,  
7  
8  
9  
10  
11 Foundation)

12  
13  
14 There was also a perception that twelve-hour shifts were more fatiguing, with less ‘down-  
15 time’ than longer but less intense on-call sessions. Work intensity was also increased by  
16  
17 rotas involving cross-cover out of hours.  
18  
19

20  
21  
22 *“My personal opinion is [the WTR have] actually increased fatigue and stress in the*  
23 *fact that you feel you have to get an increased amount of work done in a shorter*  
24 *amount of time.”* (Tel. Int. 16, Foundation)  
25  
26  
27

28  
29  
30 Provision of facilities for taking rest during a night shift was also being reduced which,  
31  
32 alongside less capacity to take breaks or compensatory rest, added to the fatigue  
33  
34 experienced. Rest periods were also lost in half days – sometimes inserted into rotas to  
35  
36 balance hours – not always being taken, sometimes because senior clinical staff were  
37  
38 unaware of them, so workload did not respond to working hours.  
39

40  
41 *“The trouble with night shift is being able to sleep during the day and most hospitals*  
42 *have no facility to actually catch a nap while on nights. The last time I worked in a*  
43 *hospital with bedrooms for on-call staff was in 2007 and that’s despite guidance from*  
44 *the Royal College of Physicians that it should be possible for someone to have a*  
45 *short nap.”* (Tel. Int. 23, Specialty)  
46  
47  
48  
49  
50

51  
52  
53 *“The difficulty is you may be entitled to various half days but the chances of them*  
54 *actually materialising are very slight...unless these things are really formalised and*  
55 *recognised they just don’t happen. I mean you can just about get your half day off*  
56  
57  
58  
59  
60

1  
2  
3 *before nights because everyone understands that you're about to start nights...but*  
4 *the rest of them just don't happen."* (Tel. Int. 19, Foundation)  
5  
6  
7

8 ~~Fatigue did not just arise from hours specified in rota design. There were many reasons,~~  
9 ~~including some voluntary, for trainees working beyond their rostered hours.~~  
10  
11

### 12 13 14 **Drivers to work long hours**

15  
16  
17 *Fatigue did not just arise from hours specified in rota design. There were many reasons,*  
18 *including some voluntary, for trainees working beyond their rostered (scheduled) hours.*  
19  
20  
21

22  
23 Some reasons for working longer hours than scheduled stemmed from the capacity to fit  
24 workload into the working period. This was more evident in shift work, where there was a  
25 feeling that incoming doctors in the evening may not have the capacity to perform non-  
26 urgent tasks, so the present doctor would finish those tasks before leaving. In contrast, in  
27 on-call rotas a trainee would simply pass the bleep to the incoming doctor and so have a  
28 cleaner handover.  
29  
30  
31  
32  
33  
34

35  
36  
37 *"You kind of know yourself if I was to leave this work it's only going to be there for me*  
38 *in the morning and there's a ward round in the morning, so I will have to get loads*  
39 *more work handed my way. So you want to get things finished."* (Tel. Int. 2,  
40  
41  
42  
43  
44  
45  
46  
47  
48  
49  
50  
51  
52  
53  
54  
55  
56  
57  
58  
59  
60  
Foundation)

Other drivers came from missing educational opportunities if trainees did not attend work  
outside the rota, including going to work on rostered days off. These opportunities included  
attending ward rounds and observing in theatre. While benefits of the WTR for work-life  
balance were perceived, there was a sense that some educational activity that had been part  
of the 'work' domain was now being taken home. This included portfolio completion and  
reading that may have been done in the workplace during slack periods on-call.



1  
2  
3 *"If you haven't got enough time to eat or go to the toilet, you can't leave work on time,*  
4 *then you definitely don't have time to go to clinics, you definitely don't have time to do*  
5 *audits or anything like that during work, it basically means that anything that is*  
6 *exclusively for your own training is basically done in your own time and the amount of*  
7 *time available to you is really diminished."* (Tel. Int. 7, Specialty)

14 Although this increased their working hours and reduced time for rest and recuperation, the  
15 benefit of taking up such opportunities was often seen to outweigh this.

19  
20 *"I've got no problems with the fact that I work a little bit over and take the extra time*  
21 *to get training opportunities and that increases my hours to get better at my job.*  
22 *That's personal sacrifice, personal advancement type stuff to get a better job to*  
23 *become a consultant."* (Focus group 11, Specialty)

28  
29  
30 There were also professional and cultural reasons for working beyond rostered hours. These  
31 related to the expectations and norms perceived among their professional group and the  
32 workplace. Trainee doctors often worked beyond rostered hours due to a sense of  
33 commitment and responsibility, both to patients and to colleagues. There were cases of  
34 trainees staying late to hand over the care of a patient, rather than force two handovers (for  
35 example where a junior doctor would stay to complete an admission in A&E, rather than  
36 hand over to another FY2 doctor, who would then have to hand over to the specialty where  
37 the patient was being admitted), due to concern for continuity of care and the risk of  
38 information being lost. There was also a strong sense of collegiality, expressed as a  
39 responsibility not to burden colleagues with routine tasks particularly as they were likely to  
40 face other immediate demands at the handover time.

51  
52  
53 *"We have just never taken the half days because we're so busy, you know; we could*  
54 *have done, but would have screwed over our colleagues."* (Focus group 2,  
55 Foundation)

1  
2  
3 At times, however, this could be perceived as a cultural expectation that some jobs would  
4 not be left – so less a choice, more an imposition. There were references to a negative  
5 culture where trainees could experience pressure from senior doctors, and other  
6 professions, to stay beyond their rostered hours, with implication of unprofessionalism if they  
7 left on time. There was also a perception amongst trainees that their professional reputation  
8 was at risk, with implications for an employment reference and future career.  
9  
10  
11  
12  
13

14  
15  
16 Concerns about working hours were often not recognised or appreciated by seniors, with  
17 some respondents identifying a dismissive attitude towards the WTR, and a feeling that such  
18 limitations were counter to medical professionalism. Some trainees also agreed that limited  
19 hours undermined professional autonomy, a feeling exacerbated if hours were enforced  
20 during the periodic two-week monitoring process.  
21  
22  
23  
24  
25  
26  
27

28 *“If you clicked that you started at 8.00 and you were meant to start at 9.00, you had*  
29 *to explain...why did you do it, so quite a lot of the time I wouldn't put down that I*  
30 *started before 9.00 because I knew I was going to have to justify that I came in*  
31 *before 9.00.”* (Focus group 5, Foundation)  
32  
33  
34  
35  
36  
37

38 Trainees reported that, as WTR compliance is derived from these New Deal monitoring  
39 reports, there was no objective record of hours worked, and there were also no formal  
40 measures for health and well-being. However, few trainees kept their own record of hours  
41 worked. ~~Despite their being conscious of working beyond rostered hours, few trainees kept~~  
42 ~~their own record of hours worked.~~ This was partly due to their view of medicine and the  
43 nature of their work, meaning that working to limited hours was not an issue to them.  
44  
45  
46  
47  
48  
49  
50

51 *“We are treated usually like we are working late due to our own failings which is not a*  
52 *nice atmosphere to work in, I think it's very important that you feel you are working,*  
53 *especially as a junior in a new career, you're working somewhere you are*  
54 *appreciated, valued and not being looked at suspiciously.”* (Tel. Int. 21, Foundation)  
55  
56  
57  
58  
59  
60

1  
2  
3 Gaps in rotas also placed additional pressure on the system, and so on individual doctors.  
4  
5 These arose from staff shortages caused by under-recruitment, as well as absences. This  
6  
7 often meant providing informal cover, for example in extended shifts. While locums were  
8  
9 used, external locums were felt to be sometimes unreliable, meaning last minute cover was  
10  
11 often necessary. Formal internal locum shifts were sometimes used, and cross-referenced  
12  
13 against rotas to ensure an individual did not exceed WTR hours, and there was no reported  
14  
15 pressure to undertake locum shifts. The trainees reported that there was a shortage of  
16  
17 available doctors to fill rotas, even without the need to comply with the WTR. Some trainees  
18  
19 felt that even fully staffed rotas would be stretched because the workload had increased  
20  
21 since the staffing levels were initially put in place.  
22  
23

24  
25 *“The fundamental issue is trying to do a decent job and you can’t do a decent job if*  
26  
27 *there aren’t enough of you on the ground, so you are always working many hours in*  
28  
29 *excess of what you should be doing, you end up tired and exhausted and jaded and*  
30  
31 *then you’re not doing a good job for your patient.”* (Tel. Int. 29, Foundation)  
32  
33

### 34 **Effects of fatigue**

35  
36  
37 Trainees identified effects of fatigue arising from their working hours. While detriments to  
38  
39 their skills and judgement were identified, these were mostly felt to affect efficiency rather  
40  
41 than safety – however risks to patient safety cannot be discounted. Some reported that  
42  
43 fatigue affected their ability to retain new information.  
44  
45

46  
47 *“I think when you were getting to the end of a thirteen hour shift you found that your*  
48  
49 *technical skills, like your ability to put a cannula into someone and stuff like that, it*  
50  
51 *certainly decreases, I find it gets a lot harder to do things that require more*  
52  
53 *concentration, things like that, but I think you’re also quite aware of that, so patient*  
54  
55 *safety wise you are aware that you are not at your best so you often check more of*  
56  
57 *your decisions with other people and things like that.”* (Tel. Int. 22, Foundation)  
58  
59  
60

1  
2  
3 *"I think 12 days in a stretch is too long without a day off, I just think it's a really long*  
4 *stretch...I think [the effect] is fatigue really and I suppose you learn less towards the*  
5 *end of those days really because you are just tired."* (Tel. Int. 26, Foundation)  
6  
7  
8

9  
10 Fatigue was also reported to affect mood, particularly when switching between different  
11 working patterns, with consequences for their professional manner. This may have  
12 consequences for team-working and interprofessional communication, as well as for  
13 interactions with patients.  
14  
15  
16

17  
18  
19 *"You become more irritable sometimes as well, I noticed I was a bit more snappy*  
20 *[when switching between long days and nights]* (Focus group 5, Foundation)  
21  
22

23  
24 *"You don't make as good decisions and you're more grumpy, you're less likely to be*  
25 *good with the patients, you know, you're more likely to just go in there and take the*  
26 *blood rather than actually you know being a doctor to them...so you have to be a lot*  
27 *more careful when you're tired I suppose."* (Tel. Int. 9, Foundation)  
28  
29  
30  
31  
32

33  
34 These issues were sometimes compounded by hunger and discomfort arising from not  
35 achieving rest breaks during long shifts.  
36  
37

38  
39 *"I think when I'm hungry my fuse is shorter and I think my compassion towards others*  
40 *is not as what it should be."* (Tel. Int. 2, Foundation)  
41  
42  
43

44  
45 A summary of the Findings is presented in Table 3 below.  
46  
47

48  
49 **Table 3. Summary of findings**

| Overall findings                                      | Detail of findings                                                                                                                                                                     |
|-------------------------------------------------------|----------------------------------------------------------------------------------------------------------------------------------------------------------------------------------------|
| Perceived effects of WTR on working hours             | General agreement that working hours were much improved under WTR; 48-hour limit appropriate (but desire for greater flexibility); intended benefits achieved to some extent           |
| Implementation of WTR in practice: effects on fatigue | Different shift systems and patterns of work (timing and adjustment).<br>Long periods without a day off.<br>Averaging over 26 weeks can still allow over 48 working hours in one week. |

|                            |                                                                                                                                                                                                                                                                                                    |
|----------------------------|----------------------------------------------------------------------------------------------------------------------------------------------------------------------------------------------------------------------------------------------------------------------------------------------------|
|                            | Work compression/work intensity.<br>Rest periods not always taken.                                                                                                                                                                                                                                 |
| Drivers to work long hours | Workload/completion of tasks.<br>Taking up educational opportunities at work.<br>Taking work home.<br>Commitment and responsibility to patients and colleagues;<br>collegiality.<br>Cultural expectations.<br>Professional reputation.<br>Views of nature of professionalism.<br>Workforce issues. |
| Effects of fatigue         | Detriment to skills and judgement: most felt to affect efficiency rather than safety.<br>Negative effect on ability to retain new information.<br>Mood and manner (compounded by physical discomfort and hunger)                                                                                   |

## Discussion

Despite the introduction of restricted working hours for junior doctors in the UK, long hours and fatigue remain, with associated consequences for performance. There was general agreement that restricting working hours was a positive thing, but that problems remained with acute workload in some working patterns. Conversely, while most felt that a 48 hour limit was appropriate, some would like more flexibility to exceed it when necessary.

It was considered that the amount of work to be carried out had not reduced, increasing the perceived intensity of work. Some working patterns were considered particularly intense and detrimental to personal well-being – with consequences for performance and education.

Long periods without a day off in particular were tiring. There is no objective record of hours worked, as WTR compliance is derived from New Deal monitoring reports, and trainees reported no formal measures for health and well-being.

There was evidence that the design of rotas was not the only factor working against well-being. Trainees were often working beyond their rostered hours for voluntary reasons of workload, perceived need to gain educational opportunities, and collegiality, but also for more external reasons such as the expectations of others and gaps in the rota. Notably these are corollaries of the voluntary reasons – rota gaps increase workload, and adverse cultures may define professional practice. Contrary to recent recommendations that ‘every

1  
2  
3 moment count' towards education in the workplace,<sup>42</sup> for some trainees at least there is  
4 increasing separation between work and education, and an increase in work intensity that  
5 may be adding new stresses to the trainee population.  
6  
7  
8  
9

10 The current study provides evidence that three years after the implementation of the WTR,  
11 and with rotas that are at least compliant on paper, fatigue remains an issue for doctors in  
12 training. This reflects some findings in the literature that a reduction in working hours alone is  
13 not enough. **The issue of increased work intensity and greater stress was noted amongst US**  
14 **residents when working hours were further restricted.**<sup>43</sup> **Performing the same amount of work**  
15 **in fewer hours (work compression) is of concern regarding workload**<sup>44</sup> **and overall well-**  
16 **being,**<sup>45</sup> **and may place trainee doctors at risk of burnout.**<sup>46</sup> Although much of the literature  
17 relating to fatigue comes from the USA where restricted working hours are still much longer  
18 than in Europe (e.g. >24 hour shifts until 2011, or 80-hour weeks), two UK self-report studies  
19 conducted shortly after implementation of the 48-hour working week have highlighted the  
20 effect of different schedules on fatigue, including the negative effect of working seven  
21 consecutive nights, having only one day of rest after night shifts, intervals of less than ten  
22 hours between shifts, and shifts of twelve consecutive days.<sup>30 31</sup> Difficulty achieving naps  
23 during night shifts, and poor provision for naps, has been reported elsewhere.<sup>33</sup> The current  
24 study has identified that fatigue is related to a number of complex issues, including rota  
25 design, but also including contextual issues such as staff shortages and rota gaps, and  
26 broader professional and cultural issues.  
27  
28  
29  
30  
31  
32  
33  
34  
35  
36  
37  
38  
39  
40  
41  
42  
43  
44  
45

46 **Cultural issues within healthcare have been found to include fatigue not being taken**  
47 **seriously, lack of discussion of fatigue issues and lack of support for napping.**<sup>47</sup> **The culture**  
48 **of medicine needs to value sleep and appropriate work schedules.**<sup>48</sup> Long working hours  
49 may be a symptom of, and contribute to, an adverse culture. Expectations of long hours,  
50 coupled with a lack of their explicit recognition, may be symptomatic of 'institutionalised  
51 disrespect' of workers,<sup>34</sup> which if it is felt to be normal may lead to further dysfunctional  
52  
53  
54  
55  
56  
57  
58  
59  
60

1  
2  
3 behaviours. Culture, particularly at the level of basic underlying assumptions that may  
4 underpin day-to-day work, can be extremely difficult to change.<sup>34 49</sup> In a study of paramedics,  
5 podiatrists and occupational therapists, the working environment has also been found to be  
6 an important factor in encouraging and developing professionalism.<sup>44-50</sup> and sSome trainees  
7 in the current study felt undermined by aspects of the professional and organisational culture  
8 and felt there was a lack of recognition of the extra hours they worked.

9  
10  
11 In other professions and industries the organisation of work, and the professional and  
12 organisational cultures they engender or reinforce (such as a culture of long working hours;  
13 cultural attitudes towards napping), has also been linked to fatigue, performance, safety,  
14 health and well-being. Such professions and industries include nursing,<sup>51</sup> aviation,<sup>52</sup> the  
15 police,<sup>53</sup> truck driving,<sup>54</sup> the shipping industry<sup>55</sup> and the construction industry.<sup>56</sup> It has also  
16 been found, in a study of metropolitan train drivers, that the successful adoption of fatigue  
17 management strategies can be positively or negatively affected by aspects of the  
18 organisational culture, such as altruism and camaraderie.<sup>57</sup> A culture of denial of vulnerability  
19 to stress and the effects of fatigue on performance has been identified in both aviation and  
20 medicine,<sup>58</sup> although one study found this to a lesser extent in aviation.<sup>59</sup>

21  
22 Work hours are closely related to psychosocial work characteristics such as work demands  
23 and autonomy.<sup>60</sup> Optimal amount and quality of workload, and opportunities for control at  
24 work are among the psychosocial criteria identified for a good work environment and good  
25 work organisation, and typically show dependence on national and organisational culture  
26 and values,<sup>61</sup> however individual differences in the desire or need for control need to be  
27 taken into account.<sup>62</sup> High work demands and work intensity, and lack of autonomy (and  
28 particularly a combination of these) have been associated with health problems.<sup>63</sup> In a study  
29 of US nurses, high job demands were associated with greater fatigue when job control was  
30 low.<sup>64</sup> Ability to influence working hours (worktime control) has been associated with fewer  
31  
32  
33  
34  
35  
36  
37  
38  
39  
40  
41  
42  
43  
44  
45  
46  
47  
48  
49  
50  
51  
52  
53  
54  
55  
56  
57  
58  
59  
60

1  
2  
3 subjective health complaints,<sup>65</sup> and with decreased work strain and decreased perceived  
4  
5 stress.<sup>66</sup>  
6  
7

8  
9 The broader cultural issues identified in relation to trainees' professional autonomy and the  
10 relationship between trainees and their seniors are of current relevance in light of the Francis  
11 report's recommendations for fundamental culture change in the NHS.<sup>4567</sup> Following these  
12 recommendations, it has been argued that more sophisticated understandings of cultural  
13 dynamics and the role of policy in shaping these may be needed.<sup>4668</sup> Fatigue may be an  
14 important mediating variable in the perpetuation of adverse cultures and practice failings,  
15 and as such should be an important component of any policies to monitor and improve  
16 workplace cultures.  
17  
18  
19  
20  
21  
22  
23

24  
25 Evaluation of the WTR must be considered in relation to the historical context within which  
26 they were implemented. Perceptions of the WTR were not isolated from other changes  
27 affecting working hours, particularly the 1991 New Deal for Junior Doctors, which imposed  
28 restrictions for the first time. At an organisational level, changes relating to the reorganisation  
29 of specialty training over the last 20 years<sup>4769</sup> affected the working environment. Trainees  
30 now have to settle on a career specialty training path sooner, meaning that the Senior House  
31 Officer (SHO) posts they would have filled in other specialties for up to several years may  
32 remain unfilled. These gaps are compounded by the reduction in the number of overseas-  
33 qualified doctors entering the UK following changes to immigration policy in 2008. The  
34 workload and hence fatigue experienced by individual trainees can therefore be seen as the  
35 end-point of many contributory factors.  
36  
37  
38  
39  
40  
41  
42  
43  
44  
45  
46  
47

### 48 49 **Strengths and limitations**

50  
51 The strength of the current study is the breadth of trainee participants, covering a range of  
52 training grades and specialties and all four nations of the UK, so gaining a picture across the  
53 trainee experience. A weakness is that the trainee participants were volunteers to the study,  
54 and as such may be open to self-selection bias. However, this risk is mitigated by the  
55  
56  
57  
58  
59  
60



1  
2  
3 instance of one group, run as part of Foundation Programme teaching, where all but four of  
4  
5 a cohort of F1s were able to attend. That group identified the same issues as the wider  
6  
7 sample, suggesting the prevalence of the concerns identified is not limited to a particularly  
8  
9 engaged sample. **There may also be some instances of inaccuracy in individual recall**  
10  
11 **regarding the exact hours trainees worked.**

## 13 **Conclusion**

14  
15  
16 The WTR have reduced the hours junior doctors work, but have not fully addressed  
17  
18 problems of fatigue and stress, due to issues in their implementation and other contextual  
19  
20 factors. The long term risks of this continued stress and fatigue, for the doctors themselves  
21  
22 and for the effective delivery of a healthcare service, should not be ignored.  
23  
24

25  
26 Future research could usefully involve an investigation of work intensity and its effects on  
27  
28 doctors' education, performance and well-being, and its impact on patient care. Such  
29  
30 research should consider the clinical demands of different specialties and the working  
31  
32 environment. Policy and practice could consider how best to monitor both working hours and  
33  
34 doctors' well-being. The closer and more effective involvement of trainees in rota design,  
35  
36 with consideration of the physiological aspects of sleep and fatigue, may help to avoid some  
37  
38 stresses, but there may need to be more fundamental consideration of necessary staffing  
39  
40 levels.  
41  
42

## 43 **Acknowledgements**

44  
45  
46 This research was funded by the General Medical Council. The authors also thank all the  
47  
48 trainee doctors who took part in focus groups or telephone interviews.  
49  
50  
51  
52  
53  
54  
55  
56  
57  
58  
59  
60

### Contributors and sources:

This article draws on research commissioned by the UK General Medical Council, designed by GM and BB, and conducted by all authors. All four authors were members of the Centre for Medical Education Research, Durham University, UK, when this research was carried out. All authors contributed to the analysis and writing of the report and the writing of this article, and approved the final version. GM is guarantor of the article.

**Competing interests:** We have read and understood the BMJ Group policy on declaration of interests and have no relevant interests to declare.

**Licence:** The Corresponding Author has the right to grant on behalf of all authors and does grant on behalf of all authors, an exclusive licence on a worldwide basis to the BMJ Publishing Group Ltd, and its Licensees, to permit this article (if accepted) to be published in *BMJ Open* and any other BMJ PGL products and to exploit all subsidiary rights, as set out in our licence.

### References

1. Morrow G, Burford B, Carter M, *et al.* *The Impact of the Working Time Regulations on medical education and training: Literature review.* Report to the GMC, August 2012.  
[http://www.gmc-uk.org/The\\_Impact\\_of\\_the\\_Working\\_Time\\_Regulations\\_on\\_Medical\\_Education\\_and\\_Training\\_Literature\\_Review.pdf](http://www.gmc-uk.org/The_Impact_of_the_Working_Time_Regulations_on_Medical_Education_and_Training_Literature_Review.pdf) 51155615.pdf
2. Ayas NT, Barger LK, Cade BE, *et al.* Extended work duration and the risk of self-reported percutaneous injuries in interns. *JAMA* 2006;296:1055-62.
3. Fisman DN, Harris AD, Rubin M, *et al.* Fatigue increases the risk of injury from sharp devices in medical trainees: results from a case-crossover study. *Infect Cont Hosp Ep* 2007;28:10-17.

- 1
- 2
- 3 4. Barger LK, Ayas NT, Cade BE, *et al.* Impact of extended-duration shifts on medical
- 4 errors, adverse events, and attentional failures. *PLOS Med* 2006;3:e487.
- 5
- 6
- 7 5. Gander P, Purnell H, Garden A, *et al.* Work patterns and fatigue-related risk among
- 8 junior doctors. *Occup Environ Med* 2007;64:733-738.
- 9
- 10
- 11 6. Kohen-Raz R, Himmelfarb M, Tzur S, *et al.* An initial evaluation of work fatigue and
- 12 circadian changes as assessed by multiplate posturography. *Percept Motor Skill*
- 13 1996;82:547-557.
- 14
- 15
- 16
- 17 7. Parshuram CS, Dhanani S, Kirsh JA, *et al.* Fellowship training, workload, fatigue and
- 18 physical stress: A prospective observational study. *Can Med Assoc J* 2004;170:965-970.
- 19
- 20
- 21 8. Smith AM, Morris P, Rowell KO, *et al.* Junior doctors and the full shift rota - psychological
- 22 and hormonal changes: a comparative cross-sectional study. *Clin Med* 2006;6:174-177.
- 23
- 24
- 25 9. Block L, Wu AW, Feldman L, *et al.* Residency schedule, burnout and patient care among
- 26 first-year residents. *Postgrad Med J* 2013;89:495-500.
- 27
- 28
- 29 10. Gohar A, Adams A, Gertner E, *et al.* Working memory capacity is decreased in sleep-
- 30 deprived internal medicine residents. *J Clin Sleep Med* 2009;5:191-197.
- 31
- 32
- 33 11. Lockley SW, Cronin JW, Evans EE, *et al.* Effect of reducing interns' weekly work hours
- 34 on sleep and attentional failures. *New Engl J Med* 2004;351:1829-1837.
- 35
- 36
- 37 12. Jakubowicz DM, Price EM, Glassman HJ, *et al.* Effects of a twenty-four hour call period
- 38 on resident performance during simulated endoscopic sinus surgery in an Accreditation
- 39 Council for Graduate Medical Education-compliant training program. *Laryngoscope*
- 40 2005;115:143-146.
- 41
- 42
- 43 13. Gander P, Millar M, Webster C, *et al.* Sleep loss and performance of anaesthesia
- 44 trainees and specialists. *Chronobiol Int* 2008; 25:1077-1091.
- 45
- 46
- 47 14. Brandenberger J, Kahol K, Feinstein AJ, *et al.* Effects of duty hours and time of day on
- 48 surgery resident proficiency. *Am J Surg* 2010;200:814-818.
- 49
- 50
- 51 15. Ellman PI, Law MG, Tache-Leon C, *et al.* Sleep deprivation does not affect operative
- 52 results in cardiac surgery. *AnnThorac Surg* 2004;78:906-911.
- 53
- 54
- 55
- 56
- 57
- 58
- 59
- 60

- 1  
2  
3 16. Lehmann KS, Martus P, Little-Elk S, *et al.* Impact of sleep deprivation on medium-term  
4 psychomotor and cognitive performance of surgeons: prospective cross-over study with  
5 a virtual surgery simulator and psychometric tests. *Surgery* 2010;147:246-254.  
6  
7  
8  
9 17. Grantcharov TP, Bardram L, Funch-Jensen P, *et al.* Laparoscopic performance after one  
10 night on call in a surgical department: prospective study. *Brit Med J* 2001;323:1222-3.  
11  
12  
13 18. Landrigan CP, Rothschild JM, Cronin JW, *et al.* Effects of reducing interns' work hours  
14 on serious medical errors in intensive care units. *New Engl J Med* 2004;351:1838-1848.  
15  
16  
17 19. Lockley SW, Landrigan CP, Barger LK, *et al.* Harvard Work Hours, Health Safety Group.  
18 When policy meets physiology: the challenge of reducing resident work hours. *Clin*  
19 *Orthop Relat R* 2006;449:16-127.  
20  
21  
22 20. Majekodunmi A, Landrigan CP. The effect of physician sleep deprivation on patient  
23 safety in perinatal-neonatal medicine. *Am J Perinat* 2012;29:43-48.  
24  
25  
26 21. Vorona RD, Chen IA, Ware JC. Physicians and sleep deprivation. *Sleep Medicine Clinics*  
27 2009;4:527-540.  
28  
29  
30 22. Paice E, Hamilton-Fairley D. Avoiding burnout in new doctors: sleep, supervision and  
31 teams. *Postgrad Med J* 2013;89:493.  
32  
33  
34 23. Sokol DK. Waking up to the effects of fatigue in doctors. *Brit Med J* 2013;347:f4906  
35  
36  
37 24. Conigliaro J, Frishman WH, Lazar EJ, *et al.* Internal medicine housestaff and attending  
38 physician perceptions of the impact of the New York State Section 405 regulations on  
39 working conditions and supervision of residents in two training programs. *J Gen Intern*  
40 *Med* 1993; 8:502-507.  
41  
42  
43 25. Kort KC, Pavone LA, Jensen E, *et al.* Resident perceptions of the impact of work-hour  
44 restrictions on health care delivery and surgical education: time for transformational  
45 change. *Surgery* 2004;136:861-871.  
46  
47  
48 26. Kiernan M, Civetta J, Bartus C, *et al.* 24 hours on-call and acute fatigue no longer  
49 worsen resident mood under the 80-hour work week regulations. *Curr Surg* 2006;63:237-  
50 241.  
51  
52  
53  
54  
55  
56  
57  
58  
59  
60

- 1  
2  
3 27. Cull WL, Mulvey HJ, Jewett EA, *et al.* Pediatric residency duty hours before and after  
4 limitations. *Pediatrics* 2006;118:e1805-1811.  
5  
6  
7 28. Reddy R, Guntupalli K, Alapat P, *et al.* Sleepiness in medical ICU residents. *Chest*  
8 2009;135:81-85.  
9  
10  
11 29. Berios I, Surani S, Simmons M. Assessing reaction time among emergency medicine  
12 residents working different shift hours. *Ann Emerg Med* 2009; 54: S35.  
13  
14  
15 30. Brown M, Tucker P, Rapport F, *et al.* The impact of shift patterns on junior doctors'  
16 perceptions of fatigue, training, work/life balance and the role of social support. *Qual Saf*  
17 *Health Care* 2010;19:e36.  
18  
19  
20  
21 31. Tucker P, Brown M, Dahlgren A, *et al.* The impact of junior doctors' worktime  
22 arrangements on their fatigue and well-being. *Scand J Work Env Hea* 2010;36:458-46  
23  
24  
25 32. Arora V, Dunphy C, Chang VY, *et al.* The effects of on-duty napping on intern sleep time  
26 and fatigue. *Ann Intern Med* 2006;144:792-798.  
27  
28  
29  
30 33. Jackson EJ, Moreton A. Safety during night shifts: a cross-sectional survey of junior  
31 doctors' preparation and practice. *BMJ Open* 2013 3: doi: 10.1136/bmjopen-2013-  
32 003567.  
33  
34  
35 34. Leape LL, Shore MF, Dienstag JL, *et al.* A culture of disrespect, Part 1: The nature and  
36 causes of disrespectful behavior by physicians. *Acad Med* 2012;87:845-852.  
37  
38  
39 35. O'Gallagher MK, Lewis G, Mercieca K, *et al.* The impact of the European Working Time  
40 Regulations on Ophthalmic Specialist Training - A national trainee survey. *Int J Surg*  
41 2013: <http://dx.doi.org/10.1016/j.ijsu.2013.08.007>  
42  
43  
44  
45 36. Illing JC, Carter M, Thompson NJ, *et al.* *Evidence synthesis on the occurrence, causes,*  
46 *consequences, prevention and management of bullying and harassing behaviours to*  
47 *inform decision making in the NHS. Final report.* NIHR Service Delivery and Organisation  
48 programme; 2013.  
49  
50  
51  
52  
53 37. Williams ES, Konrad TR, Scheckler WE, *et al.* Understanding physicians' intentions to  
54 withdraw from practice: the role of job satisfaction, job stress, mental and physical  
55 health. *AHCM* 2001;2:243-262.  
56  
57  
58  
59  
60

- 1  
2  
3 38. Edwards N, Kornacki MJ, Silversin J. Unhappy doctors: what are the causes and what  
4 can be done? *Brit Med J* 2002;324:835-8.  
5  
6  
7 39. Visser MRM, Smets EMA, Oort FJ, *et al.* Stress, satisfaction and burnout among Dutch  
8 medical specialists. *CMAJ* 2003;168:271-5.  
9  
10  
11 40. Morrow G, Burford B, Carter M, *et al.* *The Impact of the Working Time Regulations on*  
12 *medical education and training: Final report on primary research.* Report to the GMC,  
13 August 2012. [http://www.gmc-](http://www.gmc-uk.org/The_Impact_of_the_Working_Time_Regulations_on_Medical_Education_and_Training_Final_Report_on_Primary_Research.pdf_51157039.pdf)  
14 [uk.org/The\\_Impact\\_of\\_the\\_Working\\_Time\\_Regulations\\_on\\_Medical\\_Education\\_and\\_Tr](http://www.gmc-uk.org/The_Impact_of_the_Working_Time_Regulations_on_Medical_Education_and_Training_Final_Report_on_Primary_Research.pdf_51157039.pdf)  
15 [aining\\_Final\\_Report\\_on\\_Primary\\_Research.pdf\\_51157039.pdf](http://www.gmc-uk.org/The_Impact_of_the_Working_Time_Regulations_on_Medical_Education_and_Training_Final_Report_on_Primary_Research.pdf_51157039.pdf)  
16  
17  
18  
19  
20  
21 41. Ritchie J, Spencer L. Qualitative data analysis for applied policy research. In: Bryman A,  
22 Burgess RG, editors. *Analysing Qualitative Data.* London: Routledge; 1994. p.173-194.  
23  
24  
25 42. Temple J. Time for Training: A review of the impact of the European Working Time  
26 Directive on the quality of training. 2010.  
27  
28 [http://www.mee.nhs.uk/pdf/JCEWTD\\_Final%20report.pdf](http://www.mee.nhs.uk/pdf/JCEWTD_Final%20report.pdf)  
29  
30  
31 43. Auger KA, Sieplinga KR, Simmons JM, *et al.* Failure to thrive: Pediatric residents weigh  
32 in on feasibility trial of the proposed 2008 Institute of Medicine work hour restrictions. *J*  
33 *Grad Med Educ* 2009;1:181-184.  
34  
35  
36  
37 44. Goitein L. Resident workload – Let's treat the disease, not just the symptom. *JAMA*  
38 *Intern Med* 2013;173:655-656.  
39  
40  
41 45. Auger KA, Landrigan CP, Gonzalez del Ray JA, *et al.* Better rested but more stressed?  
42 Evidence of the effects of resident work hour restrictions. *Acad Pediatr* 2012;12:335-343.  
43  
44  
45  
46 46. Wayne DB, Arora V. Resident duty hours and the delicate balance between education  
47 and patient care. *J Gen Intern Med* 2008;23:1120-1121.  
48  
49  
50 47. Ferguson SA, Neall A, Dorrian J. Strategies used by healthcare practitioners to manage  
51 fatigue-related risk: beyond work hours. *Medical Sociology online* 2013;7:24-33.  
52 <http://www.medsoconline.org/>  
53  
54  
55  
56 48. Buysse DJ, Barzansky B, Dinges D, *et al.* Sleep, fatigue, and medical training: setting an  
57 agenda for optimal learning and patient care. A report from the Conference "Sleep,  
58  
59  
60

1  
2  
3 fatigue and medical training: Optimizing learning and the patient care environment".

4  
5 *Sleep* 2003;2:218-225.

6  
7 49. Schein EH. Organisational culture and leadership. 4<sup>th</sup> edn. Jossey-Bass, 2010.

8  
9 50. Morrow G, Burford B, Rothwell C, *et al.* Carter M, McLachlan J, Illing J. *Professionalism*  
10 *in healthcare professionals. Perceptions of professionalism.* Final report to the hpc,  
11 2011. [http://www.hpc-](http://www.hpc-uk.org/assets/documents/10003771Professionalisminhealthcareprofessionals.pdf)  
12 [uk.org/assets/documents/10003771Professionalisminhealthcareprofessionals.pdf](http://www.hpc-uk.org/assets/documents/10003771Professionalisminhealthcareprofessionals.pdf)  
13  
14

15  
16 51. Rogers AE. The effects of fatigue and sleepiness on nurse performance and patient  
17 safety. In: Hughes RG. editor. *Patient safety and quality: An evidence-based handbook*  
18 *for nurses.* Rockville (MD): Agency for Healthcare Research and Quality (US); 2008.p2-  
19 509-2-533.  
20  
21

22  
23 52. Gregory KB, Winn W, Johnson K, *et al.* Pilot fatigue survey: Exploring fatigue factors in  
24 air medical operations. *Air Med J* 2010;29:309-319.  
25  
26

27  
28 53. Vila B. Impact of long work hours on police officers and the communities they serve. *Am*  
29 *J Ind Med* 2006;49:972-980.  
30  
31

32  
33 54. Sabbagh-Ehrlich S, Friedman L, Richter E. Working conditions and fatigue in  
34 professional truck drivers at Israeli ports. *Inj Prev* 2005;11:110-114.  
35  
36

37  
38 55. Xhellilaj E, Lapa K. The role of human fatigue factor towards maritime casualties.  
39 *Maritime Transport & Navigation Journal* 2010;2:23-32.  
40  
41

42  
43 56. Dong X. Long workhours, work scheduling and work-related injuries among construction  
44 workers in the United States. *Scand J Work Environ Health* 2005;31:329-335.  
45  
46

47  
48 57. Rainbird S, Thompson K, Dawson D. The impact of organisational culture on fatigue  
49 management: The case of camaraderie amongst metropolitan train drivers. In: Sargent  
50 C, Darwent D, Roach GD. editors. *Living in a 24/7 world: The impact of circadian*  
51 *disruption on sleep, work and health.* Adelaide: Australasian Chronobiology Society;  
52 2010.p.29-33.  
53  
54

55  
56 58. Helmreich RL. On error management: lessons from aviation. *Brit Med J* 2000;320:781-  
57 785.  
58  
59  
60

- 1  
2  
3 59. Sexton JB, Thomas EJ, Helmreich RL. Error, stress and teamwork in medicine and  
4 aviation: cross sectional surveys. *Brit Med J* 2000;320:745-749.  
5  
6  
7 60. Härmä M. Workhours in relation to work stress, recovery and health. *Scand J Work*  
8 *Environ Health* 2006;32:502-514.  
9  
10  
11 61. Lindström K. Psychosocial criteria for good work organization. *Scand J Work Environ*  
12 *Health* 1994;20:123-133.  
13  
14  
15 62. Sparks K, Faragher B, Cooper CL. Well-being and occupational health in the 21st  
16 century workplace. *J Occup Organ Psych* 2001;74:489-509.  
17  
18  
19 63. Eurofound. Fifth European working conditions survey. Publications Office of the  
20 European Union, Luxembourg, 2012.  
21  
22 <http://www.eurofound.europa.eu/pubdocs/2011/82/en/1/EF1182EN.pdf>  
23  
24  
25 64. Van Yperen NW, Hagedoorn M. Do high job demands increase intrinsic motivation or  
26 fatigue or both? The role of job control and job social support. *Acad Manage J*  
27 2003;46:339-348.  
28  
29  
30  
31 65. Costa G, Akerstedt T, Nachreiner F, et al. Flexible working hours, health, and well-being  
32 in Europe: some considerations from a SALTSA project. *Chronobiol Int* 2004;21:831-  
33 844.  
34  
35  
36  
37 66. Kandolin I, Huida O. Individual flexibility: an essential pre-requisite in arranging shift  
38 schedules for midwives. *J Nurs Manag* 1996;4:213-217.  
39  
40  
41  
42 67. Francis R. *Report of the Mid Staffordshire NHS Foundation Trust public inquiry*.  
43 Stationery Office, 2013.  
44  
45  
46 68. Davies H, Mannion R. Will prescriptions for cultural change improve the NHS? *Brit Med J*  
47 2013;346:f1305.  
48  
49  
50 69. HMSO. Hospital Doctors: Training for the future. The report of the working group on  
51 specialist medical training. HMSO, 1993.  
52  
53  
54  
55  
56  
57  
58  
59  
60



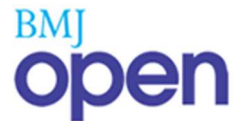

**Have restricted working hours reduced junior doctors' experience of fatigue? A focus group and telephone interview study**

|                                 |                                                                                                                                                                                                                                                                                                                         |
|---------------------------------|-------------------------------------------------------------------------------------------------------------------------------------------------------------------------------------------------------------------------------------------------------------------------------------------------------------------------|
| Journal:                        | <i>BMJ Open</i>                                                                                                                                                                                                                                                                                                         |
| Manuscript ID:                  | bmjopen-2013-004222.R2                                                                                                                                                                                                                                                                                                  |
| Article Type:                   | Research                                                                                                                                                                                                                                                                                                                |
| Date Submitted by the Author:   | 03-Feb-2014                                                                                                                                                                                                                                                                                                             |
| Complete List of Authors:       | Morrow, Gill; Durham University, Centre for Medical Education Research<br>Burford, Bryan; Newcastle University, School of Medical Sciences Education Development<br>Carter, Madeline; Durham University, Centre for Medical Education Research<br>Illing, Jan; Durham University, Centre for Medical Education Research |
| <b>Primary Subject Heading</b>: | Medical education and training                                                                                                                                                                                                                                                                                          |
| Secondary Subject Heading:      | Qualitative research                                                                                                                                                                                                                                                                                                    |
| Keywords:                       | FATIGUE, WORKING TIME REGULATIONS, JUNIOR DOCTORS, WORKING HOURS RESTRICTIONS, DOCTORS IN TRAINING                                                                                                                                                                                                                      |
|                                 |                                                                                                                                                                                                                                                                                                                         |

SCHOLARONE™  
Manuscripts

1  
2  
3  
4 **Have restricted working hours reduced junior doctors' experience of fatigue? A focus**  
5 **group and telephone interview study**  
6  
7

8  
9  
10 **Gill Morrow**

11 Senior Research Associate

12 Centre for Medical Education Research

13 Durham University

14 Burdon House

15 Leazes Road

16 Durham

17 DH1 1TA  
18  
19  
20  
21  
22  
23  
24  
25  
26  
27

28 **Bryan Burford**

29 Lecturer in Medical Education

30 School of Medical Sciences Education Development

31 The Medical School

32 Ridley Building 1

33 Newcastle University

34 Newcastle upon Tyne

35 NE1 7RU  
36  
37  
38  
39  
40  
41  
42  
43  
44  
45

46 **Madeline Carter**

47 Research Fellow

48 Centre for Medical Education Research

49 Durham University

50 Burdon House

51 Leazes Road  
52  
53  
54  
55  
56  
57  
58  
59  
60

1  
2  
3 Durham

4  
5 DH1 1TA  
6  
7

8  
9 **Jan Illing**

10 Professor in Medical Education

11 Centre for Medical Education Research

12 Durham University

13 Burdon House

14 Leazes Road

15 Durham

16 DH1 1TA  
17  
18  
19  
20  
21  
22  
23  
24  
25  
26  
27  
28  
29  
30  
31  
32  
33  
34  
35  
36  
37  
38  
39  
40  
41  
42  
43  
44  
45  
46  
47  
48  
49  
50  
51  
52  
53  
54  
55  
56  
57  
58  
59  
60

**ABSTRACT**

**Objective** To explore the effects of the UK Working Time Regulations (WTR) on trainee doctors' experience of fatigue.

**Design** Qualitative study involving focus groups and telephone interviews, conducted in Spring 2012 with doctors purposively selected from Foundation and specialty training. Final compliance with a 48 hour per week limit had been required for trainee doctors since August 2009. Framework analysis of data.

**Setting** Nine deaneries in all four UK nations; secondary care.

**Participants** 82 doctors: 53 Foundation trainees and 29 specialty trainees. Thirty-six participants were male, 46 female. Specialty trainees were from a wide range of medical and surgical specialties, and psychiatry.

**Results** Implementation of the WTR, whilst acknowledged as an improvement to the earlier situation of prolonged excessive hours, has not wholly overcome experience of long working hours and fatigue. Fatigue did not only arise from the hours that were scheduled, but also from an unpredictable mixture of shifts, work intensity (which often resulted in educational tasks being taken home), and inadequate rest. Fatigue was also caused by trainees working beyond their scheduled hours, for reasons such as task completion, accessing additional educational opportunities beyond scheduled hours, and staffing shortages. There were also organisational, professional and cultural drivers, such as a sense of responsibility to patients and colleagues and the expectations of seniors. Fatigue was perceived to affect efficiency of skills and judgement, mood, and learning capacity.

**Conclusions** Long-term risks of continued stress and fatigue, for doctors and for the effective delivery of a healthcare service, should not be ignored. Current monitoring processes do not reflect doctors' true working patterns. The effectiveness of the WTR cannot be considered in isolation from the culture and context of the workplace. On-going attention

1  
2  
3 needs to be paid to broader cultural issues, including the relationship between trainees and  
4  
5 seniors.  
6  
7  
8  
9  
10  
11  
12  
13  
14  
15  
16  
17  
18  
19  
20  
21  
22  
23  
24  
25  
26  
27  
28  
29  
30  
31  
32  
33  
34  
35  
36  
37  
38  
39  
40  
41  
42  
43  
44  
45  
46  
47  
48  
49  
50  
51  
52  
53  
54  
55  
56  
57  
58  
59  
60

For peer review only

## ARTICLE SUMMARY

### Article focus

The aim of the paper is to explore the effects of the UK Working Time Regulations (WTR) on trainee doctors' experience of fatigue.

### Key messages

- The implementation of the WTR, whilst acknowledged to be an improvement to the earlier situation of prolonged excessive hours, has not wholly overcome experience of long working hours and fatigue. Reasons for persistent fatigue include the organisation of working patterns, work compression and intensity - thus also taking more work home – and working longer than rostered hours. This was related to taking up extra educational opportunities at work and to professional and organisational culture, including trainees' sense of responsibility towards patients and colleagues and the expectations of seniors. Current monitoring processes do not reflect doctors' true working patterns.lack sensitivity to issues regarding rotas and hours worked.
- Effects on fatigue and on education cannot be isolated from other contextual factors, including workforce issues.
- On-going attention needs to be paid to broader cultural issues identified in relation to expectations placed on trainees and the relationship between trainees and their seniors.

### Strengths and limitations

- The strength of the study is the breadth of trainee participants, covering a range of training grades and specialties and all four nations of the UK.
- A potential weakness is that participants were volunteers to the study, and as such may be open to self-selection bias. However, this risk is mitigated by the instance of one group run as part of Foundation Programme teaching, where all but four of a cohort of Foundation Year One trainees (F1s) were able to attend. That group

1  
2  
3 identified the same issues as the wider sample, suggesting the prevalence of the  
4  
5 issues identified is not limited to a particularly engaged sample. There may also be  
6  
7 potential inaccuracies in individual recall of hours worked.  
8  
9  
10  
11  
12  
13  
14  
15  
16  
17  
18  
19  
20  
21  
22  
23  
24  
25  
26  
27  
28  
29  
30  
31  
32  
33  
34  
35  
36  
37  
38  
39  
40  
41  
42  
43  
44  
45  
46  
47  
48  
49  
50  
51  
52  
53  
54  
55  
56  
57  
58  
59  
60

For peer review only

1  
2  
3 **Title: Have restricted working hours reduced junior doctors' experience of fatigue? A**  
4 **focus group and telephone interview study**  
5  
6  
7

8 **Introduction**  
9

10  
11  
12 There is a considerable body of evidence recognising that fatigue has adverse physiological,  
13 psychological and cognitive effects and can lead to deficits in performance and safety.<sup>1</sup>

14  
15 Fatigue in doctors is associated with increases of in risks to personal safety at work<sup>2 3</sup> and  
16 outside work,<sup>4 5</sup> and risks to health and well-being.<sup>6-9</sup> There is also evidence of detriments to  
17 performance, for example in cognitive abilities<sup>10 11</sup> and psychomotor skills<sup>12-14</sup> (although  
18 some studies have found no performance effects<sup>15 16</sup>). Fatigue has also been associated  
19 directly with negative consequences for patient safety such as clinical errors and diagnostic  
20 mistakes.<sup>4 5 17-20</sup> This has been a concern in medicine for several years<sup>21</sup> and remains so  
21 today.<sup>22 23</sup> The effects may be compounded by a risk that doctors do not recognise that they  
22 may be subject to adverse effects.<sup>23</sup>  
23  
24  
25  
26  
27  
28  
29  
30  
31  
32

33  
34 Several countries have introduced limits on working hours. For example, in the USA, since  
35 2003, there has been national implementation of an Accreditation Council for Graduate  
36 Medical Education (ACGME) 80-hour resident work week restriction, averaged over four  
37 weeks; however the limit is lower in Europe. The European Working Time Directive (EWTD)  
38 was introduced to limit hours, to address health and safety concerns for all workers arising  
39 from long hours. Each European Union member state implemented the Directive in its own  
40 legislation – the UK as the Working Time Regulations (1998). These Regulations (the WTR)  
41 have applied fully to junior doctors since 2009, with a limit of 48 hours per week, averaged  
42 across a reference period of 26 weeks, alongside specified minimum rest periods. The WTR  
43 are implemented in rotas (work schedules) alongside the New Deal, which specifies a  
44 maximum of 56 hours per week, with a system of banded payments.  
45  
46  
47  
48  
49  
50  
51  
52  
53  
54  
55  
56  
57  
58  
59  
60



1  
2  
3 Positive effects of a reduction in working hours have been found in many studies,<sup>24-26</sup> but not  
4 all.<sup>27 28</sup> The effect varies with the precise implementation of restrictions, with fatigue affected  
5 by work patterns including the number of consecutive days or nights worked, the intervals  
6 between shifts, and the timing of shifts (day/evening/night).<sup>29-31</sup> Short naps may ameliorate  
7 the negative effects of fatigue,<sup>32</sup> and awareness of the benefits of naps and other  
8 recommendations and interventions to limit fatigue associated with rotating shift work may  
9 be needed.<sup>33</sup>

10  
11  
12  
13  
14  
15  
16  
17  
18 Organisational cultures of long or antisocial hours<sup>34</sup> may also be a factor impacting on stress  
19 and fatigue, and trainees have reported being unofficially expected to work extra hours  
20 voluntarily.<sup>35</sup> Furthermore workload pressures and poor work design may increase risks of  
21 negative behaviours among staff.<sup>36</sup> Limits on professional autonomy – the amount of control  
22 doctors have traditionally held over their practice – may also increase doctors' stress and  
23 reduce job satisfaction.<sup>37-39</sup>

24  
25  
26  
27  
28  
29  
30  
31  
32 Consequently, simply restricting the number of work hours may be insufficient to address  
33 issues relating to fatigue and its consequences. With this in mind, the question is raised  
34 whether the WTR will have achieved the aim of improving junior doctors' well-being and  
35 fatigue. To date, there has been little research looking directly at the effects of the WTR as  
36 implemented and experienced in practice. This paper draws on a larger research study  
37 considering perceptions of the effects of the WTR,<sup>40</sup> and focuses specifically on their effects  
38 on trainee doctors' fatigue.

## 47 48 **Method**

49  
50  
51 The research was reviewed by the Durham University School of Medicine, Pharmacy and  
52 Health Ethics Sub-Committee, and a favourable ethical opinion received.

53  
54  
55  
56 Focus groups and telephone interviews (with participants who were unable to attend a focus  
57 group) were conducted with Foundation Year One (FY1) and Foundation Year Two (FY2)

1  
2  
3 trainees and specialty trainees, sampled purposively from nine deaneries in all four nations  
4 of the UK. The Foundation Programme is a two-year generic training programme undertaken  
5 after completing medical school, and is followed by specialist or general practice training.  
6  
7

8  
9 The WTR apply to all years of training in the same way.  
10

11  
12 The focus group topic guide and interview questions focused on perceptions and experience  
13 of working hours following the WTR and any educational or personal impact. Trainees were  
14 asked about their knowledge of the WTR; their perceptions of their working hours in practice,  
15 including shifts, rotas and compliance; issues concerning educational opportunities;  
16 monitoring of working hours, and any personal effects they experienced. Some specialty  
17 trainees had experience of working before the introduction of the WTR, and were asked  
18 about the change.  
19  
20  
21  
22  
23  
24  
25  
26

27 Recruitment was undertaken following local advice; in some cases through the Deanery, in  
28 others through education centres in individual hospitals. An information sheet about the  
29 study was distributed to trainees via email from the Deaneries or individual Trusts, and  
30 participation was on a voluntary basis. Written consent was taken at the start of focus groups  
31 and verbal consent at the start of telephone interviews, including consent for audio  
32 recording. Recordings were later transcribed. GM and BB conducted the focus groups and  
33 telephone interviews. Focus groups lasted between 60 and 90 minutes, and telephone  
34 interviews between 30 and 45 minutes.  
35  
36  
37  
38  
39  
40  
41  
42  
43  
44

## 45 **Analysis**

46  
47 Data were analysed using a framework approach.<sup>41</sup> An initial stage of familiarisation, to gain  
48 an overall view of the data, involved reading the transcripts and noting the range and depth  
49 in the data collected. Meetings between all four researchers engaged in this process (GM,  
50 BB, MC, JI) enabled discussion of the concepts and themes that emerged from the data. A  
51 thematic framework was subsequently identified by GM and BB. This involved identifying the  
52  
53  
54  
55  
56  
57  
58  
59  
60

1  
2  
3 key issues, concepts or themes by which the data could be examined and sorted. The  
4  
5 construction of the framework drew upon:

- 6  
7
- 8 • *a priori* issues - those issues that were known or assumed to be pertinent, that guided  
9 the study aims and were developed into the topic guide/interview schedule;
- 10  
11
- 12 • *emergent* issues - those issues that were raised by the respondents (e.g. issues relating  
13 to work intensity);
- 14  
15
- 16 • *analytic* issues - those themes that emerged from patterns and re-occurrences in the  
17 data (e.g. professionalism)
- 18  
19  
20  
21

22 The framework was then applied to the data by GM and BB through indexing and charting,  
23 and themes and sub-themes were further refined. Finally, a stage of mapping and  
24 interpretation involved bringing the key themes within the data set together and pulling  
25 together the findings of the analysis as a whole. Table 1 summarises the main *a priori*  
26 themes, emergent themes, and analytic themes related to fatigue and illustrates the mapping  
27 and interpretation of the themes. The process of analysis helped provide an explanation of  
28 why fatigue remains an issue, and of the inter-relatedness of the issues identified.

29  
30  
31  
32  
33  
34  
35  
36  
37  
38 Data from focus groups and telephone interviews were analysed concurrently and no  
39 differences in themes were identified.  
40  
41  
42  
43  
44  
45  
46  
47  
48  
49  
50  
51  
52  
53  
54  
55  
56  
57  
58  
59  
60

Table 1. Development of themes in framework analysis

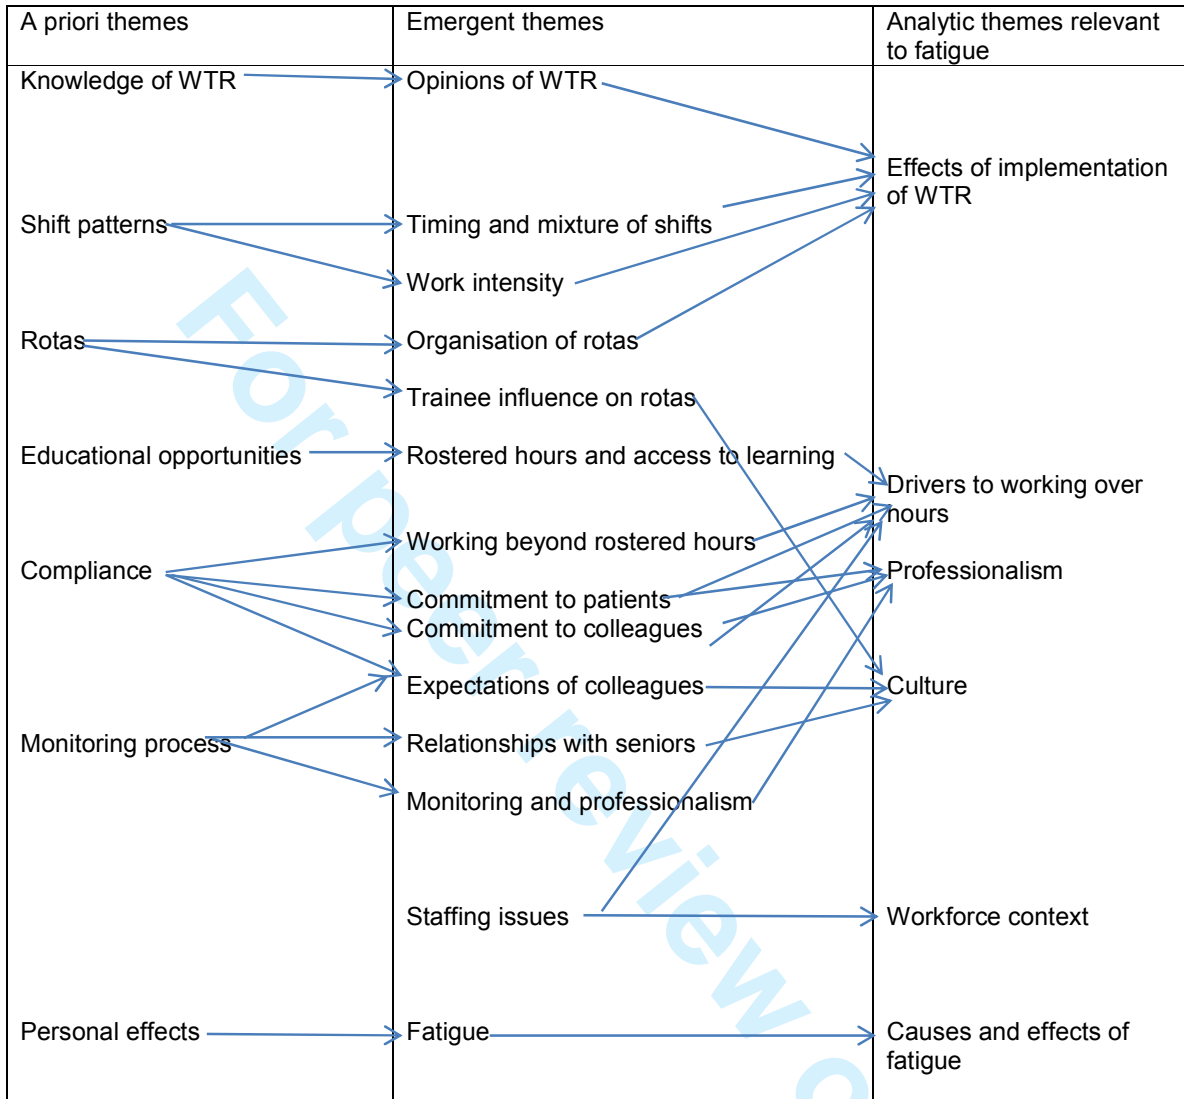

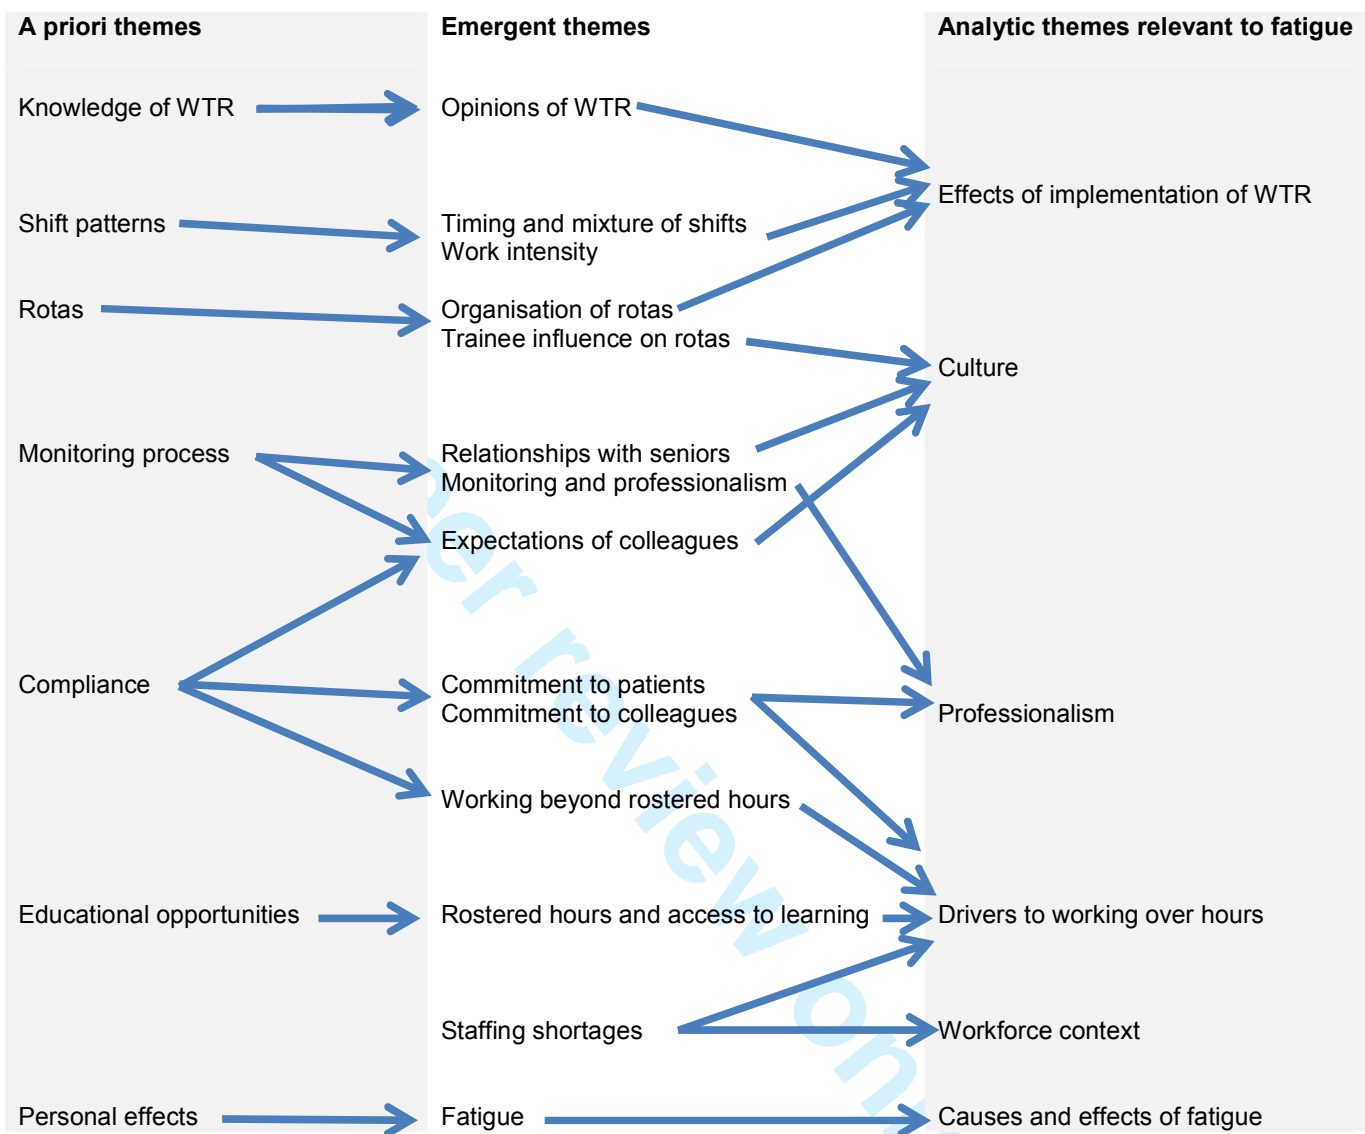

**Findings**

Eleven focus groups and 30 telephone interviews were conducted with 82 junior doctors.

See Table 2 for details of the training grades of participants.

Table 2. Training grades of participants

| Foundation Year 1 (FY1)       | Foundation Year 2 (FY2) | Core or specialty training up to CT/ST3* | ST4 or higher ** |
|-------------------------------|-------------------------|------------------------------------------|------------------|
| 40                            | 13                      | 7                                        | 22               |
| Total Foundation trainees: 53 |                         | Total specialty trainees: 29             |                  |

\* These are trainees in the first three years of their specialty training, and were likely to have started specialty training after the WTR introduction in 2009.

\*\* These are in higher specialty training, in their fourth year or above.

Thirty-six participants were male and 46 were female. Specialty trainee participants were training in a wide range of medical and surgical specialties, and psychiatry.

An overview summary of the Findings from the data is presented in Table 3 below.

Table 3. Summary Overview of findings

| Overall findings                                      | Detail of findings                                                                                                                                                                                                                                                                              |
|-------------------------------------------------------|-------------------------------------------------------------------------------------------------------------------------------------------------------------------------------------------------------------------------------------------------------------------------------------------------|
| Perceived effects of WTR on working hours             | General agreement that working hours were much improved under WTR; 48-hour limit appropriate (but desire for greater flexibility); intended benefits achieved to some extent                                                                                                                    |
| Implementation of WTR in practice: effects on fatigue | Different shift systems and patterns of work (timing and adjustment).<br>Long periods without a day off.<br>Averaging over 26 weeks can still allow over 48 working hours in one week.<br>Work compression/work intensity.<br>Rest periods not always taken.                                    |
| Drivers to work long hours                            | Workload/completion of tasks.<br>Taking up educational opportunities at work.<br>Taking work home.<br>Commitment and responsibility to patients and colleagues; collegiality.<br>Cultural expectations.<br>Professional reputation.<br>Views of nature of professionalism.<br>Workforce issues. |
| Effects of fatigue                                    | Detriment to skills and judgement: most felt to affect efficiency rather than safety.<br>Negative effect on ability to retain new information.<br>Mood and manner (compounded by physical discomfort and hunger)                                                                                |

### Perceived effects of WTR on working hours

There was general agreement that working hours were much improved under the WTR, and that intended benefits in terms of reduced trainee fatigue and improved work-life balance had been achieved to some extent. Many trainees felt that the 48-hour limit was appropriate and enabled sufficient training experience, albeit with a perceived lack of flexibility.

*“I think, speaking to people who didn’t have the forty-eight hour working time directive thing, we get a lot more time to go home and enjoy ourselves and be outside the hospital than they ever did and I think that’s a good thing, I feel like I’ve got a bit more of a life.”* (Tel. Int. 22, Foundation)

### Implementation of WTR in practice: effects on fatigue

However, some participants did report still working long hours and experiencing fatigue despite the 48-hour limit and this was found to be related to a number of factors including the way in which the Regulations were implemented and other organisational and contextual factors.

The WTR have not entirely eliminated long hours, with some trainees giving examples of working up to 100 hours in a week. However, fatigue did not necessarily arise just from the long hours worked, but also the organisation of work within those hours, for example the mixture of day and night shifts, and long shifts straddling day and night (e.g. 2.00pm to 2.00am). Rotas could involve five consecutive days at work with 13-hour shifts, and working up to 12 consecutive days or, for some, seven consecutive nights (despite Royal College recommendations to the contrary). Trainees reported that averaging meant that a working week could exceed 70 hours and remain compliant.

*“I don’t think the hours are long, so doing a 12 hour day or 13 hour day is fine, I think doing 12 days in a row you hit delirium about day ten and then you over-ride it...so I*

1  
2  
3 *don't think it's the shift I think it's the number of days you work in a row.*" (Focus  
4 group 3, Foundation)

5  
6  
7  
8 *"There's no continuity in terms of predictability of, right this is what I'm doing and, for*  
9 *example, my rota you run an eight cycle rota so you've got eight weeks to get*  
10 *through and none of those eight weeks are the same at all, and you jump around with*  
11 *longs and lates in-between and I think that from my side is what creates fatigue."*

12  
13  
14  
15 (Focus group 10, Specialty)

16  
17  
18  
19  
20 *"That was a particularly difficult shift on the assessment suite because you would go*  
21 *from five long days with maybe two days off, or a day off sometimes, and then onto a*  
22 *period of nights, you are constantly swapping from nights to days which was tiring,*  
23 *and 12 hour shifts and 13 hour shifts were always a bit of a drag."* (Tel. Int. 22,

24  
25  
26  
27  
28 Foundation)

29  
30  
31 There was also a perception that twelve-hour shifts were more fatiguing, with less 'down-  
32 time' than longer but less intense on-call sessions. Work intensity was also increased by  
33 rotas involving cross-cover out of hours.

34  
35  
36  
37  
38  
39 *"My personal opinion is [the WTR have] actually increased fatigue and stress in the*  
40 *fact that you feel you have to get an increased amount of work done in a shorter*  
41 *amount of time."* (Tel. Int. 16, Foundation)

42  
43  
44  
45  
46 Provision of facilities for taking rest during a night shift was also being reduced which,  
47 alongside less capacity to take breaks or compensatory rest, added to the fatigue  
48 experienced. Rest periods were also lost in half days – sometimes inserted into rotas to  
49 balance hours – not always being taken, sometimes because senior clinical staff were  
50 unaware of them, so workload did not respond to working hours.  
51  
52  
53  
54  
55  
56  
57  
58  
59  
60



1  
2  
3 *“The trouble with night shift is being able to sleep during the day and most hospitals*  
4 *have no facility to actually catch a nap while on nights. The last time I worked in a*  
5 *hospital with bedrooms for on-call staff was in 2007 and that’s despite guidance from*  
6 *the Royal College of Physicians that it should be possible for someone to have a*  
7 *short nap.”* (Tel. Int. 23, Specialty)

8  
9  
10  
11  
12  
13  
14 *“The difficulty is you may be entitled to various half days but the chances of them*  
15 *actually materialising are very slight...unless these things are really formalised and*  
16 *recognised they just don’t happen. I mean you can just about get your half day off*  
17 *before nights because everyone understands that you’re about to start nights...but*  
18 *the rest of them just don’t happen.”* (Tel. Int. 19, Foundation)

### 24 **Drivers to work long hours**

25  
26  
27  
28  
29  
30 Fatigue did not just arise from hours specified in rota design. There were many reasons,  
31 including some voluntary, for trainees working beyond their rostered (scheduled) hours.

32  
33  
34  
35 Some reasons for working longer hours than scheduled stemmed from the capacity to fit  
36 workload into the working period. This was more evident in shift work, where there was a  
37 feeling that incoming doctors in the evening may not have the capacity to perform non-  
38 urgent tasks, so the present doctor would finish those tasks before leaving. In contrast, in  
39 on-call rotas a trainee would simply pass the bleep to the incoming doctor and so have a  
40 cleaner handover.  
41  
42  
43  
44  
45  
46  
47

48  
49 *“You kind of know yourself if I was to leave this work it’s only going to be there for me*  
50 *in the morning and there’s a ward round in the morning, so I will have to get loads*  
51 *more work handed my way. So you want to get things finished.”* (Tel. Int. 2,  
52  
53  
54  
55 Foundation)

1  
2  
3 Other drivers came from missing educational opportunities if trainees did not attend work  
4 outside the rota, including going to work on rostered days off. These opportunities included  
5 attending ward rounds and observing in theatre. While benefits of the WTR for work-life  
6 balance were perceived, there was a sense that some educational activity that had been part  
7 of the 'work' domain was now being taken home. This included portfolio completion and  
8 reading that may have been done in the workplace during slack periods on-call.  
9  
10  
11  
12  
13  
14

15  
16  
17 *"If you haven't got enough time to eat or go to the toilet, you can't leave work on time,*  
18 *then you definitely don't have time to go to clinics, you definitely don't have time to do*  
19 *audits or anything like that during work, it basically means that anything that is*  
20 *exclusively for your own training is basically done in your own time and the amount of*  
21 *time available to you is really diminished."* (Tel. Int. 7, Specialty)  
22  
23  
24  
25  
26  
27

28 Although this increased their working hours and reduced time for rest and recuperation, the  
29 benefit of taking up such opportunities was often seen to outweigh this.  
30  
31  
32

33  
34 *"I've got no problems with the fact that I work a little bit over and take the extra time*  
35 *to get training opportunities and that increases my hours to get better at my job.*  
36 *That's personal sacrifice, personal advancement type stuff to get a better job to*  
37 *become a consultant."* (Focus group 11, Specialty)  
38  
39  
40  
41  
42

43 There were also professional and cultural reasons for working beyond rostered hours. These  
44 related to the expectations and norms perceived among their professional group and the  
45 workplace. Trainee doctors often worked beyond rostered hours due to a sense of  
46 commitment and responsibility, both to patients and to colleagues. There were cases of  
47 trainees staying late to hand over the care of a patient, rather than force two handovers (for  
48 example where a junior doctor would stay to complete an admission in A&E, rather than  
49 hand over to another FY2 doctor, who would then have to hand over to the specialty where  
50 the patient was being admitted), due to concern for continuity of care and the risk of  
51  
52  
53  
54  
55  
56  
57  
58  
59  
60

1  
2  
3 information being lost. There was also a strong sense of collegiality, expressed as a  
4 responsibility not to burden colleagues with routine tasks particularly as they were likely to  
5 face other immediate demands at the handover time.  
6  
7  
8  
9

10  
11 *“We have just never taken the half days because we’re so busy, you know; we could*  
12 *have done, but would have screwed over our colleagues.”* (Focus group 2,  
13 Foundation)  
14  
15

16  
17  
18 At times, however, this could be perceived as a cultural expectation that some jobs would  
19 not be left – so less a choice, more an imposition. There were references to a negative  
20 culture where trainees could experience pressure from senior doctors, and other  
21 professions, to stay beyond their rostered hours, with implication of unprofessionalism if they  
22 left on time. There was also a perception amongst trainees that their professional reputation  
23 was at risk, with implications for an employment reference and future career.  
24  
25  
26  
27  
28  
29

30  
31 Concerns about working hours were often not recognised or appreciated by seniors, with  
32 some respondents identifying a dismissive attitude towards the WTR, and a feeling that such  
33 limitations were counter to medical professionalism. Some trainees also agreed that limited  
34 hours undermined professional autonomy, a feeling exacerbated if hours were enforced  
35 during the periodic two-week monitoring process.  
36  
37  
38  
39  
40  
41

42  
43 *“If you clicked that you started at 8.00 and you were meant to start at 9.00, you had*  
44 *to explain...why did you do it, so quite a lot of the time I wouldn’t put down that I*  
45 *started before 9.00 because I knew I was going to have to justify that I came in*  
46 *before 9.00.”* (Focus group 5, Foundation)  
47  
48  
49  
50  
51

52  
53 Trainees reported that, as WTR compliance is derived from these New Deal monitoring  
54 reports, there was no objective record of hours worked, and there were also no formal  
55 measures for health and well-being. However, few trainees kept their own record of hours  
56  
57  
58  
59  
60

1  
2  
3 worked despite their being conscious of working beyond rostered hours. This was partly due  
4 to their view of medicine and the nature of their work, meaning that working to limited hours  
5 was not an issue to them.  
6  
7

8  
9  
10 *“We are treated usually like we are working late due to our own failings which is not a*  
11 *nice atmosphere to work in, I think it’s very important that you feel you are working,*  
12 *especially as a junior in a new career, you’re working somewhere you are*  
13 *appreciated, valued and not being looked at suspiciously.”* (Tel. Int. 21, Foundation)  
14  
15  
16  
17  
18

19  
20 Gaps in rotas also placed additional pressure on the system, and so on individual doctors.  
21 These arose from staff shortages caused by under-recruitment, as well as absences. This  
22 often meant providing informal cover, for example in extended shifts. While locums were  
23 used, external locums were felt to be sometimes unreliable, meaning last minute cover was  
24 often necessary. Formal internal locum shifts were sometimes used, and cross-referenced  
25 against rotas to ensure an individual did not exceed WTR hours, and there was no reported  
26 pressure to undertake locum shifts. The trainees reported that there was a shortage of  
27 available doctors to fill rotas, even without the need to comply with the WTR. Some trainees  
28 felt that even fully staffed rotas would be stretched because the workload had increased  
29 since the staffing levels were initially put in place.  
30  
31  
32  
33  
34  
35  
36  
37  
38  
39  
40  
41

42 *“The fundamental issue is trying to do a decent job and you can’t do a decent job if*  
43 *there aren’t enough of you on the ground, so you are always working many hours in*  
44 *excess of what you should be doing, you end up tired and exhausted and jaded and*  
45 *then you’re not doing a good job for your patient.”* (Tel. Int. 29, Foundation)  
46  
47  
48  
49  
50

## 51 **Effects of fatigue**

52  
53  
54 Trainees identified effects of fatigue arising from their working hours. While detriments to  
55 their skills and judgement were identified, these were mostly felt to affect efficiency rather  
56  
57  
58  
59  
60

1  
2  
3 than safety – however risks to patient safety cannot be discounted. Some reported that  
4  
5 fatigue affected their ability to retain new information.  
6

7  
8 *“I think when you were getting to the end of a thirteen hour shift you found that your*  
9 *technical skills, like your ability to put a cannula into someone and stuff like that, it*  
10 *certainly decreases, I find it gets a lot harder to do things that require more*  
11 *concentration, things like that, but I think you’re also quite aware of that, so patient*  
12 *safety wise you are aware that you are not at your best so you often check more of*  
13 *your decisions with other people and things like that.”* (Tel. Int. 22, Foundation)  
14  
15

16  
17  
18 *“I think 12 days in a stretch is too long without a day off, I just think it’s a really long*  
19 *stretch...I think [the effect] is fatigue really and I suppose you learn less towards the*  
20 *end of those days really because you are just tired.”* (Tel. Int. 26, Foundation)  
21  
22

23  
24  
25  
26  
27  
28 Fatigue was also reported to affect mood, particularly when switching between different  
29  
30 working patterns, with consequences for their professional manner. This may have  
31  
32 consequences for team-working and interprofessional communication, as well as for  
33  
34 interactions with patients.  
35

36  
37 *“You become more irritable sometimes as well, I noticed I was a bit more snappy*  
38 *[when switching between long days and nights]* (Focus group 5, Foundation)  
39  
40

41  
42 *“You don’t make as good decisions and you’re more grumpy, you’re less likely to be*  
43 *good with the patients, you know, you’re more likely to just go in there and take the*  
44 *blood rather than actually you know being a doctor to them...so you have to be a lot*  
45 *more careful when you’re tired I suppose.”* (Tel. Int. 9, Foundation)  
46  
47  
48  
49

50  
51  
52 These issues were sometimes compounded by hunger and discomfort arising from not  
53  
54 achieving rest breaks during long shifts.  
55

1  
2  
3 *"I think when I'm hungry my fuse is shorter and I think my compassion towards others*  
4 *is not as what it should be."* (Tel. Int. 2, Foundation)  
5  
6  
7

8 A summary of the Findings is presented in Table 3 below.  
9

10  
11  
12 Table 3. Summary of findings  
13

| Overall findings                                      | Detail of findings                                                                                                                                                                                                                                                                              |
|-------------------------------------------------------|-------------------------------------------------------------------------------------------------------------------------------------------------------------------------------------------------------------------------------------------------------------------------------------------------|
| Perceived effects of WTR on working hours             | General agreement that working hours were much improved under WTR; 48-hour limit appropriate (but desire for greater flexibility); intended benefits achieved to some extent                                                                                                                    |
| Implementation of WTR in practice: effects on fatigue | Different shift systems and patterns of work (timing and adjustment).<br>Long periods without a day off.<br>Averaging over 26 weeks can still allow over 48 working hours in one week.<br>Work compression/work intensity.<br>Rest periods not always taken.                                    |
| Drivers to work long hours                            | Workload/completion of tasks.<br>Taking up educational opportunities at work.<br>Taking work home.<br>Commitment and responsibility to patients and colleagues; collegiality.<br>Cultural expectations.<br>Professional reputation.<br>Views of nature of professionalism.<br>Workforce issues. |
| Effects of fatigue                                    | Detriment to skills and judgement: most felt to affect efficiency rather than safety.<br>Negative effect on ability to retain new information.<br>Mood and manner (compounded by physical discomfort and hunger)                                                                                |

14  
15  
16  
17  
18  
19  
20  
21  
22  
23  
24  
25  
26  
27  
28  
29  
30  
31  
32  
33  
34  
35  
36  
37  
38  
39 **Discussion**  
40

41 Despite the introduction of restricted working hours for junior doctors in the UK, long hours  
42 and fatigue remain, with associated consequences for performance. There was general  
43 agreement that restricting working hours was a positive thing, but that problems remained  
44 with acute workload in some working patterns. Conversely, while most felt that a 48 hour  
45 limit was appropriate, some would like more flexibility to exceed it when necessary.  
46  
47  
48  
49  
50

51  
52  
53 It was considered that the amount of work to be carried out had not reduced, increasing the  
54 perceived intensity of work. Some working patterns were considered particularly intense and  
55 detrimental to personal well-being – with consequences for performance and education.  
56  
57  
58  
59  
60

1  
2  
3 Long periods without a day off in particular were tiring. There is no objective record of hours  
4 worked, as WTR compliance is derived from New Deal monitoring reports, and trainees  
5 reported no formal measures for health and well-being.  
6  
7  
8

9  
10 There was evidence that the design of rotas was not the only factor working against well-  
11 being. Trainees were often working beyond their rostered hours for voluntary reasons of  
12 workload, perceived need to gain educational opportunities, and collegiality, but also for  
13 more external reasons such as the expectations of others and gaps in the rota. Notably  
14 these are corollaries of the voluntary reasons – rota gaps increase workload, and adverse  
15 cultures may define professional practice. Contrary to recent recommendations that ‘every  
16 moment count’ towards education in the workplace,<sup>42</sup> for some trainees at least there is  
17 increasing separation between work and education, and an increase in work intensity that  
18 may be adding new stresses to the trainee population.  
19  
20  
21  
22  
23  
24  
25  
26  
27  
28

29  
30 The current study provides evidence that three years after the implementation of the WTR,  
31 and with rotas that are at least compliant on paper, fatigue remains an issue for doctors in  
32 training. This reflects some findings in the literature that a reduction in working hours alone is  
33 not enough. The issue of increased work intensity and greater stress was noted amongst US  
34 residents when working hours were further restricted.<sup>43</sup> Performing the same amount of work  
35 in fewer hours (work compression) is of concern regarding workload<sup>44</sup> and overall well-  
36 being,<sup>45</sup> and may place trainee doctors at risk of burnout.<sup>46</sup> Although much of the literature  
37 relating to fatigue comes from the USA where restricted working hours are still much longer  
38 than in Europe (e.g. >24 hour shifts until 2011, or 80-hour weeks), two UK self-report studies  
39 conducted shortly after implementation of the 48-hour working week have highlighted the  
40 effect of different schedules on fatigue, including the negative effect of working seven  
41 consecutive nights, having only one day of rest after night shifts, intervals of less than ten  
42 hours between shifts, and shifts of twelve consecutive days.<sup>30 31</sup> Difficulty achieving naps  
43 during night shifts, and poor provision for naps, has been reported elsewhere.<sup>33</sup> The current  
44  
45  
46  
47  
48  
49  
50  
51  
52  
53  
54  
55  
56  
57  
58  
59  
60

1  
2  
3 study has identified that fatigue is related to a number of complex issues, including rota  
4 design, but also including contextual issues such as staff shortages and rota gaps, and  
5 broader professional and cultural issues.  
6  
7

8  
9  
10 Cultural issues within healthcare have been found to include fatigue not being taken  
11 seriously, lack of discussion of fatigue issues and lack of support for napping.<sup>47</sup> The culture  
12 of medicine needs to value sleep and appropriate work schedules.<sup>48</sup> Long working hours  
13 may be a symptom of, and contribute to, an adverse culture. Expectations of long hours,  
14 coupled with a lack of their explicit recognition, may be symptomatic of 'institutionalised  
15 disrespect' of workers,<sup>34</sup> which if it is felt to be normal may lead to further dysfunctional  
16 behaviours. Culture, particularly at the level of basic underlying assumptions that may  
17 underpin day-to-day work, can be extremely difficult to change.<sup>34 49</sup> In a study of paramedics,  
18 podiatrists and occupational therapists, the working environment was found to be an  
19 important factor in encouraging and developing professionalism.<sup>44 50</sup> Some trainees in the  
20 current study felt undermined by aspects of the professional and organisational culture and  
21 felt there was a lack of recognition of the extra hours they worked. This was compounded by  
22 pressure from seniors to work and record compliant hours during monitoring periods, even if  
23 that was unrepresentative of the usual functioning of the rota. This highlights tensions that  
24 can be experienced by trainee doctors who are required to work in compliance with the WTR  
25 but also meet the demands of the healthcare service and the needs of patients, and  
26 simultaneously want to satisfy their own professional standards and maximise their  
27 educational opportunities.  
28  
29  
30  
31  
32  
33  
34  
35  
36  
37  
38  
39  
40  
41  
42  
43  
44  
45  
46  
47

48 In other professions and industries the organisation of work, and the professional and  
49 organisational cultures they engender or reinforce (such as a culture of long working hours;  
50 cultural attitudes towards napping), has also been linked to fatigue, performance, safety,  
51 health and well-being. Such professions and industries include nursing,<sup>51</sup> aviation,<sup>52</sup> the  
52 police,<sup>53</sup> truck driving,<sup>54</sup> the shipping industry<sup>55</sup> and the construction industry.<sup>56</sup> It has also  
53  
54  
55  
56  
57  
58  
59  
60



1  
2  
3 been found, in a study of metropolitan train drivers, that the successful adoption of fatigue  
4 management strategies can be positively or negatively affected by aspects of the  
5 organisational culture, such as altruism and camaraderie.<sup>57</sup> A culture of denial of vulnerability  
6 to stress and the effects of fatigue on performance has been identified in both aviation and  
7 medicine,<sup>58</sup> although one study found this to a lesser extent in aviation.<sup>59</sup>  
8  
9  
10  
11  
12  
13

14 Work hours are closely related to psychosocial work characteristics such as work demands  
15 and autonomy.<sup>60</sup> Optimal amount and quality of workload, and opportunities for control at  
16 work are among the psychosocial criteria identified for a good work environment and good  
17 work organisation, and typically show dependence on national and organisational culture  
18 and values,<sup>61</sup> however individual differences in the desire or need for control need to be  
19 taken into account.<sup>62</sup> High work demands and work intensity, and lack of autonomy (and  
20 particularly a combination of these) have been associated with health problems.<sup>63</sup> In a study  
21 of US nurses, high job demands were associated with greater fatigue when job control was  
22 low.<sup>64</sup> Ability to influence working hours (worktime control) has been associated with fewer  
23 subjective health complaints,<sup>65</sup> and with decreased work strain and decreased perceived  
24 stress.<sup>66</sup>  
25  
26  
27  
28  
29  
30  
31  
32  
33  
34  
35  
36  
37

38 The broader cultural issues identified in relation to trainees' professional autonomy and the  
39 relationship between trainees and their seniors are of current relevance in light of the Francis  
40 report's recommendations for fundamental culture change in the NHS.<sup>67</sup> Following these  
41 recommendations, it has been argued that more sophisticated understandings of cultural  
42 dynamics and the role of policy in shaping these may be needed.<sup>68</sup> Fatigue may be an  
43 important mediating variable in the perpetuation of adverse cultures and practice failings,  
44 and as such should be an important component of any policies to monitor and improve  
45 workplace cultures.  
46  
47  
48  
49  
50  
51  
52  
53

54  
55 Evaluation of the WTR must be considered in relation to the historical context within which  
56 they were implemented. Perceptions of the WTR were not isolated from other changes  
57  
58  
59  
60

1  
2  
3 affecting working hours, particularly the 1991 New Deal for Junior Doctors, which imposed  
4 restrictions for the first time. At an organisational level, changes relating to the reorganisation  
5 of specialty training over the last 20 years<sup>69</sup> affected the working environment. Trainees now  
6 have to settle on a career specialty training path sooner, meaning that the Senior House  
7 Officer (SHO) posts they would have filled in other specialties for up to several years may  
8 remain unfilled. These gaps are compounded by the reduction in the number of overseas-  
9 qualified doctors entering the UK following changes to immigration policy in 2008. The  
10 workload and hence fatigue experienced by individual trainees can therefore be seen as the  
11 end-point of many contributory factors.  
12  
13  
14  
15  
16  
17  
18  
19  
20

### 21 **Strengths and limitations**

22  
23  
24 The strength of the current study is the breadth of trainee participants, covering a range of  
25 training grades and specialties and all four nations of the UK, so gaining a picture across the  
26 trainee experience. A weakness is that the trainee participants were volunteers to the study,  
27 and as such may be open to self-selection bias. However, this risk is mitigated by the  
28 instance of one group, run as part of Foundation Programme teaching, where all but four of  
29 a cohort of F1s were able to attend. That group identified the same issues as the wider  
30 sample, suggesting the prevalence of the concerns identified is not limited to a particularly  
31 engaged sample. There may also be some instances of inaccuracy in individual recall  
32 regarding the exact hours trainees worked.  
33  
34  
35  
36  
37  
38  
39  
40  
41  
42  
43

### 44 **Conclusion**

45  
46 The WTR have reduced the hours junior doctors work, but have not fully addressed  
47 problems of fatigue and stress, due to issues in their implementation and other contextual  
48 factors. The long term risks of this continued stress and fatigue, for the doctors themselves  
49 and for the effective delivery of a healthcare service, should not be ignored.  
50  
51  
52  
53  
54  
55  
56  
57  
58  
59  
60

1  
2  
3 Future research could usefully involve an investigation of work intensity and its effects on  
4 doctors' education, performance and well-being, and its impact on patient care. Such  
5 research should consider the clinical demands of different specialties and the working  
6 environment. Policy and practice could consider how best to monitor both working hours and  
7 doctors' well-being. The closer and more effective involvement of trainees in rota design,  
8 with consideration of the physiological aspects of sleep and fatigue, may help to avoid some  
9 stresses, but there may need to be more fundamental consideration of necessary staffing  
10 levels.  
11  
12  
13  
14  
15  
16  
17  
18  
19  
20  
21  
22  
23  
24  
25  
26  
27  
28  
29  
30  
31  
32  
33  
34  
35  
36  
37  
38  
39  
40  
41  
42  
43  
44  
45  
46  
47  
48  
49  
50  
51  
52  
53  
54  
55  
56  
57  
58  
59  
60

## Acknowledgements

This research was funded by the General Medical Council. The authors also thank all the trainee doctors who took part in focus groups or telephone interviews.

**Funding:** This work was funded by the General Medical Council

## Contributors and sources:

This article draws on research commissioned by the UK General Medical Council, designed by GM and BB, and conducted by all authors. All four authors were members of the Centre for Medical Education Research, Durham University, UK, when this research was carried out. All authors contributed to the analysis and writing of the report and the writing of this article, and approved the final version. GM is guarantor of the article.

**Competing interests:** We have read and understood the BMJ Group policy on declaration of interests and have no relevant interests to declare.

**Data Sharing Statement:** No additional data are available

**Licence:** The Corresponding Author has the right to grant on behalf of all authors and does grant on behalf of all authors, an exclusive licence on a worldwide basis to the BMJ Publishing Group Ltd, and its Licensees, to permit this article (if accepted) to be published in *BMJ Open* and any other BMJPG products and to exploit all subsidiary rights, as set out in our licence.

## References

1. Morrow G, Burford B, Carter M, *et al.* *The Impact of the Working Time Regulations on medical education and training: Literature review.* Report to the GMC, August 2012.  
[http://www.gmc-uk.org/The\\_Impact\\_of\\_the\\_Working\\_Time\\_Regulations\\_on\\_Medical\\_Education\\_and\\_Training\\_\\_\\_Literature\\_Review.pdf\\_51155615.pdf](http://www.gmc-uk.org/The_Impact_of_the_Working_Time_Regulations_on_Medical_Education_and_Training___Literature_Review.pdf_51155615.pdf)
2. Ayas NT, Barger LK, Cade BE, *et al.* Extended work duration and the risk of self-reported percutaneous injuries in interns. *JAMA* 2006;296:1055-62.
3. Fisman DN, Harris AD, Rubin M, *et al.* Fatigue increases the risk of injury from sharp devices in medical trainees: results from a case-crossover study. *Infect Cont Hosp Ep* 2007;28:10-17.
4. Barger LK, Ayas NT, Cade BE, *et al.* Impact of extended-duration shifts on medical errors, adverse events, and attentional failures. *PLOS Med* 2006;3:e487.
5. Gander P, Purnell H, Garden A, *et al.* Work patterns and fatigue-related risk among junior doctors. *Occup Environ Med* 2007;64:733-738.
6. Kohen-Raz R, Himmelfarb M, Tzur S, *et al.* An initial evaluation of work fatigue and circadian changes as assessed by multiplate posturography. *Percept Motor Skill* 1996;82:547-557.
7. Parshuram CS, Dhanani S, Kirsh JA, *et al.* Fellowship training, workload, fatigue and physical stress: A prospective observational study. *Can Med Assoc J* 2004;170:965-970.
8. Smith AM, Morris P, Rowell KO, *et al.* Junior doctors and the full shift rota - psychological and hormonal changes: a comparative cross-sectional study. *Clin Med* 2006;6:174-177.
9. Block L, Wu AW, Feldman L, *et al.* Residency schedule, burnout and patient care among first-year residents. *Postgrad Med J* 2013;89:495-500.

10. Gohar A, Adams A, Gertner E, *et al.* Working memory capacity is decreased in sleep-deprived internal medicine residents. *J Clin Sleep Med* 2009;5:191-197.
11. Lockley SW, Cronin JW, Evans EE, *et al.* Effect of reducing interns' weekly work hours on sleep and attentional failures. *New Engl J Med* 2004;351:1829-1837.
12. Jakubowicz DM, Price EM, Glassman HJ, *et al.* Effects of a twenty-four hour call period on resident performance during simulated endoscopic sinus surgery in an Accreditation Council for Graduate Medical Education-compliant training program. *Laryngoscope* 2005;115:143-146.
13. Gander P, Millar M, Webster C, *et al.* Sleep loss and performance of anaesthesia trainees and specialists. *Chronobiol Int* 2008; 25;1077-1091.
14. Brandenberger J, Kahol K, Feinstein AJ, *et al.* Effects of duty hours and time of day on surgery resident proficiency. *Am J Surg* 2010;200:814-818.
15. Ellman PI, Law MG, Tache-Leon C, *et al.* Sleep deprivation does not affect operative results in cardiac surgery. *Ann Thorac Surg* 2004;78:906-911.
16. Lehmann KS, Martus P, Little-Elk S, *et al.* Impact of sleep deprivation on medium-term psychomotor and cognitive performance of surgeons: prospective cross-over study with a virtual surgery simulator and psychometric tests. *Surgery* 2010;147:246-254.
17. Grantcharov TP, Bardram L, Funch-Jensen P, *et al.* Laparoscopic performance after one night on call in a surgical department: prospective study. *Brit Med J* 2001;323:1222-3.
18. Landrigan CP, Rothschild JM, Cronin JW, *et al.* Effects of reducing interns' work hours on serious medical errors in intensive care units. *New Engl J Med* 2004;351:1838-1848.
19. Lockley SW, Landrigan CP, Barger LK, *et al.* Harvard Work Hours, Health Safety Group. When policy meets physiology: the challenge of reducing resident work hours. *Clin Orthop Relat R* 2006;449:16-127.
20. Majekodunmi A, Landrigan CP. The effect of physician sleep deprivation on patient safety in perinatal-neonatal medicine. *Am J Perinat* 2012;29:43-48.
21. Vorona RD, Chen IA, Ware JC. Physicians and sleep deprivation. *Sleep Medicine Clinics* 2009;4:527-540.

- 1  
2  
3 22. Paice E, Hamilton-Fairley D. Avoiding burnout in new doctors: sleep, supervision and  
4 teams. *Postgrad Med J* 2013;89:493.  
5  
6  
7 23. Sokol DK. Waking up to the effects of fatigue in doctors. *Brit Med J* 2013;347:f4906.  
8  
9 24. Conigliaro J, Frishman WH, Lazar EJ, *et al*. Internal medicine housestaff and attending  
10 physician perceptions of the impact of the New York State Section 405 regulations on  
11 working conditions and supervision of residents in two training programs. *J Gen Intern*  
12 *Med* 1993; 8:502-507.  
13  
14  
15 25. Kort KC, Pavone LA, Jensen E, *et al*. Resident perceptions of the impact of work-hour  
16 restrictions on health care delivery and surgical education: time for transformational  
17 change. *Surgery* 2004;136:861-871.  
18  
19  
20 26. Kiernan M, Civetta J, Bartus C, *et al*. 24 hours on-call and acute fatigue no longer  
21 worsen resident mood under the 80-hour work week regulations. *Curr Surg* 2006;63:237-  
22 241.  
23  
24  
25 27. Cull WL, Mulvey HJ, Jewett EA, *et al*. Pediatric residency duty hours before and after  
26 limitations. *Pediatrics* 2006;118:e1805-1811.  
27  
28  
29 28. Reddy R, Guntupalli K, Alapat P, *et al*. Sleepiness in medical ICU residents. *Chest*  
30 2009;135:81-85.  
31  
32  
33 29. Berios I, Surani S, Simmons M. Assessing reaction time among emergency medicine  
34 residents working different shift hours. *Ann Emerg Med* 2009; 54: S35.  
35  
36  
37 30. Brown M, Tucker P, Rapport F, *et al*. The impact of shift patterns on junior doctors'  
38 perceptions of fatigue, training, work/life balance and the role of social support. *Qual Saf*  
39 *Health Care* 2010;19:e36.  
40  
41  
42 31. Tucker P, Brown M, Dahlgren A, *et al*. The impact of junior doctors' worktime  
43 arrangements on their fatigue and well-being. *Scand J Work Env Hea* 2010;36:458-46.  
44  
45  
46 32. Arora V, Dunphy C, Chang VY, *et al*. The effects of on-duty napping on intern sleep time  
47 and fatigue. *Ann Intern Med* 2006;144:792-798.  
48  
49  
50  
51  
52  
53  
54  
55  
56  
57  
58  
59  
60

- 1  
2  
3 33. Jackson EJ, Moreton A. Safety during night shifts: a cross-sectional survey of junior  
4 doctors' preparation and practice. *BMJ Open* 2013 3: doi: 10.1136/bmjopen-2013-  
5 003567.  
6  
7  
8  
9 34. Leape LL, Shore MF, Dienstag JL, *et al.* A culture of disrespect, Part 1: The nature and  
10 causes of disrespectful behavior by physicians. *Acad Med* 2012;87:845-852.  
11  
12 35. O'Gallagher MK, Lewis G, Mercieca K, *et al.* The impact of the European Working Time  
13 Regulations on Ophthalmic Specialist Training - A national trainee survey. *Int J Surg*  
14 2013: <http://dx.doi.org/10.1016/j.ijisu.2013.08.007>  
15  
16  
17 36. Illing JC, Carter M, Thompson NJ, *et al.* *Evidence synthesis on the occurrence, causes,*  
18 *consequences, prevention and management of bullying and harassing behaviours to*  
19 *inform decision making in the NHS. Final report.* NIHR Service Delivery and Organisation  
20 programme; 2013.  
21  
22  
23 37. Williams ES, Konrad TR, Scheckler WE, *et al.* Understanding physicians' intentions to  
24 withdraw from practice: the role of job satisfaction, job stress, mental and physical  
25 health. *AHCM* 2001;2:243-262.  
26  
27  
28 38. Edwards N, Kornacki MJ, Silversin J. Unhappy doctors: what are the causes and what  
29 can be done? *Brit Med J* 2002;324:835-8.  
30  
31  
32 39. Visser MRM, Smets EMA, Oort FJ, *et al.* Stress, satisfaction and burnout among Dutch  
33 medical specialists. *CMAJ* 2003;168:271-5.  
34  
35  
36 40. Morrow G, Burford B, Carter M, *et al.* *The Impact of the Working Time Regulations on*  
37 *medical education and training: Final report on primary research.* Report to the GMC,  
38 August 2012. [http://www.gmc-](http://www.gmc-uk.org/The_Impact_of_the_Working_Time_Regulations_on_Medical_Education_and_Training_Final_Report_on_Primary_Research.pdf_51157039.pdf)  
39 [uk.org/The\\_Impact\\_of\\_the\\_Working\\_Time\\_Regulations\\_on\\_Medical\\_Education\\_and\\_Tr](http://www.gmc-uk.org/The_Impact_of_the_Working_Time_Regulations_on_Medical_Education_and_Training_Final_Report_on_Primary_Research.pdf_51157039.pdf)  
40 [aining\\_Final\\_Report\\_on\\_Primary\\_Research.pdf\\_51157039.pdf](http://www.gmc-uk.org/The_Impact_of_the_Working_Time_Regulations_on_Medical_Education_and_Training_Final_Report_on_Primary_Research.pdf_51157039.pdf)  
41  
42  
43  
44  
45  
46  
47  
48  
49  
50  
51  
52 41. Ritchie J, Spencer L. Qualitative data analysis for applied policy research. In: Bryman A,  
53 Burgess RG, editors. *Analysing Qualitative Data.* London: Routledge; 1994. p.173-194.  
54  
55  
56  
57  
58  
59  
60



- 1  
2  
3 42. Temple J. Time for Training: A review of the impact of the European Working Time  
4 Directive on the quality of training. 2010.  
5  
6 [http://www.mee.nhs.uk/pdf/JCEWTD\\_Final%20report.pdf](http://www.mee.nhs.uk/pdf/JCEWTD_Final%20report.pdf)  
7  
8
- 9 43. Auger KA, Sieplinga KR, Simmons JM, *et al*. Failure to thrive: Pediatric residents weigh  
10 in on feasibility trial of the proposed 2008 Institute of Medicine work hour restrictions. *J*  
11 *Grad Med Educ* 2009;1:181-184.  
12
- 13 44. Goitein L. Resident workload – Let’s treat the disease, not just the symptom. *JAMA*  
14 *Intern Med* 2013;173:655-656.  
15
- 16 45. Auger KA, Landrigan CP, Gonzalez del Ray JA, *et al*. Better rested but more stressed?  
17 Evidence of the effects of resident work hour restrictions. *Acad Pediatr* 2012;12:335-343.  
18
- 19 46. Wayne DB, Arora V. Resident duty hours and the delicate balance between education  
20 and patient care. *J Gen Intern Med* 2008;23:1120-1121.  
21
- 22 47. Ferguson SA, Neall A, Dorrian J. Strategies used by healthcare practitioners to manage  
23 fatigue-related risk: beyond work hours. *Medical Sociology online* 2013;7:24-33.  
24
- 25 <http://www.medsoconline.org/>  
26  
27
- 28 48. Buysse DJ, Barzansky B, Dinges D, *et al*. Sleep, fatigue, and medical training: setting an  
29 agenda for optimal learning and patient care. A report from the Conference “Sleep,  
30 fatigue and medical training: Optimizing learning and the patient care environment”.  
31 *Sleep* 2003;2:218-225.  
32
- 33 49. Schein EH. Organisational culture and leadership. 4<sup>th</sup> edn. Jossey-Bass, 2010.  
34
- 35 50. Morrow G, Burford B, Rothwell C, *et al*. *Professionalism in healthcare professionals.*  
36 *Perceptions of professionalism*. Final report to the hpc, 2011. [http://www.hpc-](http://www.hpc-uk.org/assets/documents/10003771Professionalisminhealthcareprofessionals.pdf)  
37 [uk.org/assets/documents/10003771Professionalisminhealthcareprofessionals.pdf](http://www.hpc-uk.org/assets/documents/10003771Professionalisminhealthcareprofessionals.pdf)  
38  
39
- 40 51. Rogers AE. The effects of fatigue and sleepiness on nurse performance and patient  
41 safety. In: Hughes RG. editor. Patient safety and quality: An evidence-based handbook  
42 for nurses. Rockville (MD): Agency for Healthcare Research and Quality (US); 2008.p2-  
43 509-2-533.  
44  
45  
46  
47  
48  
49  
50  
51  
52  
53  
54  
55  
56  
57  
58  
59  
60

- 1  
2  
3 52. Gregory KB, Winn W, Johnson K, *et al.* Pilot fatigue survey: Exploring fatigue factors in  
4  
5 air medical operations. *Air Med J* 2010;29:309-319.  
6  
7 53. Vila B. Impact of long work hours on police officers and the communities they serve. *Am*  
8  
9 *J Ind Med* 2006;49:972-980.  
10  
11 54. Sabbagh-Ehrlich S, Friedman L, Richter E. Working conditions and fatigue in  
12  
13 professional truck drivers at Israeli ports. *Inj Prev* 2005;11:110-114.  
14  
15 55. Xhellilaj E, Lapa K. The role of human fatigue factor towards maritime casualties.  
16  
17 *Maritime Transport & Navigation Journal* 2010;2:23-32.  
18  
19 56. Dong X. Long workhours, work scheduling and work-related injuries among construction  
20  
21 workers in the United States. *Scand J Work Environ Health* 2005;31:329-335.  
22  
23 57. Rainbird S, Thompson K, Dawson D. The impact of organisational culture on fatigue  
24  
25 management: The case of camaraderie amongst metropolitan train drivers. In: Sargent  
26  
27 C, Darwent D, Roach GD. editors. *Living in a 24/7 world: The impact of circadian*  
28  
29 *disruption on sleep, work and health.* Adelaide: Australasian Chronobiology Society;  
30  
31 2010.p.29-33.  
32  
33 58. Helmreich RL. On error management: lessons from aviation. *Brit Med J* 2000;320:781-  
34  
35 785.  
36  
37 59. Sexton JB, Thomas EJ, Helmreich RL. Error, stress and teamwork in medicine and  
38  
39 aviation: cross sectional surveys. *Brit Med J* 2000;320:745-749.  
40  
41 60. Härmä M. Workhours in relation to work stress, recovery and health. *Scand J Work*  
42  
43 *Environ Health* 2006;32:502-514.  
44  
45 61. Lindström K. Psychosocial criteria for good work organization. *Scand J Work Environ*  
46  
47 *Health* 1994;20:123-133.  
48  
49 62. Sparks K, Faragher B, Cooper CL. Well-being and occupational health in the 21st  
50  
51 century workplace. *J Occup Organ Psych* 2001;74:489-509.  
52  
53 63. Eurofound. Fifth European working conditions survey. Publications Office of the  
54  
55 European Union, Luxembourg, 2012.  
56  
57 <http://www.eurofound.europa.eu/pubdocs/2011/82/en/1/EF1182EN.pdf>  
58  
59  
60

- 1  
2  
3 64. Van Yperen NW, Hagedoorn M. Do high job demands increase intrinsic motivation or  
4 fatigue or both? The role of job control and job social support. *Acad Manage J*  
5 2003;46:339-348.  
6  
7  
8  
9 65. Costa G, Akerstedt T, Nachreiner F, *et al.* Flexible working hours, health, and well-being  
10 in Europe: some considerations from a SALTSA project. *Chronobiol Int* 2004;21:831-  
11 844.  
12  
13  
14  
15 66. Kandolin I, Huida O. Individual flexibility: an essential pre-requisite in arranging shift  
16 schedules for midwives. *J Nurs Manag* 1996;4:213-217.  
17  
18  
19 67. Francis R. *Report of the Mid Staffordshire NHS Foundation Trust public inquiry.*  
20 Stationery Office, 2013.  
21  
22  
23 68. Davies H, Mannion R. Will prescriptions for cultural change improve the NHS? *Brit Med J*  
24 2013;346:f1305.  
25  
26  
27 69. HMSO. Hospital Doctors: Training for the future. The report of the working group on  
28 specialist medical training. HMSO, 1993.  
29  
30  
31  
32  
33  
34  
35  
36  
37  
38  
39  
40  
41  
42  
43  
44  
45  
46  
47  
48  
49  
50  
51  
52  
53  
54  
55  
56  
57  
58  
59  
60

1  
2  
3  
4 **Have restricted working hours reduced junior doctors' experience of fatigue? A focus**  
5 **group and telephone interview study**  
6  
7

8  
9  
10 Gill Morrow

11 Senior Research Associate

12 Centre for Medical Education Research

13 Durham University

14 Burdon House

15 Leazes Road

16 Durham

17 DH1 1TA

18  
19  
20  
21  
22  
23  
24  
25  
26  
27  
28 Bryan Burford

29 Lecturer in Medical Education

30 School of Medical Sciences Education Development

31 The Medical School

32 Ridley Building 1

33 Newcastle University

34 Newcastle upon Tyne

35 NE1 7RU

36  
37  
38  
39  
40  
41  
42  
43  
44  
45  
46 Madeline Carter

47 Research Fellow

48 Centre for Medical Education Research

49 Durham University

50 Burdon House

51 Leazes Road

1  
2  
3 Durham

4  
5 DH1 1TA

6  
7  
8  
9 Jan Illing

10  
11 Professor in Medical Education

12  
13 Centre for Medical Education Research

14  
15 Durham University

16  
17 Burdon House

18  
19 Leazes Road

20  
21 Durham

22  
23 DH1 1TA

**ABSTRACT**

**Objective** To explore the effects of the UK Working Time Regulations (WTR) on trainee doctors' experience of fatigue.

**Design** Qualitative study involving focus groups and telephone interviews, conducted in **Spring 2012** with doctors purposively selected from Foundation and specialty training. **Final compliance with a 48 hour per week limit had been required for trainee doctors since August 2009.** Framework analysis of data.

**Setting** Nine deaneries in all four UK nations; secondary care.

**Participants** 82 doctors: 53 Foundation trainees and 29 specialty trainees. Thirty-six participants were male, 46 female. Specialty trainees were from a wide range of medical and surgical specialties, and psychiatry.

**Results** Implementation of the WTR, whilst acknowledged **as** an improvement to the earlier situation of prolonged excessive hours, has not wholly overcome experience of long working hours and fatigue. Fatigue did not **only** arise from **the hours that were scheduled**, but also from an unpredictable mixture of shifts, work intensity (which often resulted in educational tasks being taken home), and inadequate rest. **Fatigue** was also caused by trainees working beyond their **scheduled hours**, for reasons **such as task completion**, accessing **additional** educational opportunities **beyond** scheduled hours, and staffing **shortages**. There were also organisational, professional and cultural **drivers**, such as a sense of responsibility to patients and colleagues and the expectations of seniors. Fatigue was perceived to affect efficiency of skills and judgement, mood, and learning capacity.

**Conclusions** Long-term risks of continued stress and fatigue, for doctors and for the effective delivery of a healthcare service, should not be ignored. **Current monitoring processes do not reflect doctors' true working patterns. The effectiveness of the WTR cannot be considered in isolation from the culture and context of the workplace.** On-going attention

1  
2  
3 needs to be paid to broader cultural issues, including the relationship between trainees and  
4  
5 seniors.  
6  
7  
8  
9  
10  
11  
12  
13  
14  
15  
16  
17  
18  
19  
20  
21  
22  
23  
24  
25  
26  
27  
28  
29  
30  
31  
32  
33  
34  
35  
36  
37  
38  
39  
40  
41  
42  
43  
44  
45  
46  
47  
48  
49  
50  
51  
52  
53  
54  
55  
56  
57  
58  
59  
60

For peer review only

## ARTICLE SUMMARY

### Article focus

The aim of the paper is to explore the effects of the UK Working Time Regulations (WTR) on trainee doctors' experience of fatigue.

### Key messages

- The implementation of the WTR, whilst acknowledged to be an improvement to the earlier situation of prolonged excessive hours, has not wholly overcome experience of long working hours and fatigue. Reasons for persistent fatigue include the organisation of working patterns, work compression and intensity - thus also taking more work home – and working longer than rostered hours. This was related to taking up extra educational opportunities at work and to professional and organisational culture, including trainees' sense of responsibility towards patients and colleagues and the expectations of seniors. Current monitoring processes **do not reflect doctors' true working patterns**. ~~lack sensitivity to issues regarding rotas and hours worked.~~
- Effects on fatigue and on education cannot be isolated from other contextual factors, including workforce issues.
- On-going attention needs to be paid to broader cultural issues identified in relation to expectations placed on trainees and the relationship between trainees and their seniors.

### Strengths and limitations

- The strength of the study is the breadth of trainee participants, covering a range of training grades and specialties and all four nations of the UK.
- A potential weakness is that participants were volunteers to the study, and as such may be open to self-selection bias. However, this risk is mitigated by the instance of one group run as part of Foundation Programme teaching, where all but four of a cohort of Foundation Year One trainees (F1s) were able to attend. That group



1  
2  
3 identified the same issues as the wider sample, suggesting the prevalence of the  
4  
5 issues identified is not limited to a particularly engaged sample. There may also be  
6  
7 potential inaccuracies in individual recall of hours worked.  
8  
9  
10  
11  
12  
13  
14  
15  
16  
17  
18  
19  
20  
21  
22  
23  
24  
25  
26  
27  
28  
29  
30  
31  
32  
33  
34  
35  
36  
37  
38  
39  
40  
41  
42  
43  
44  
45  
46  
47  
48  
49  
50  
51  
52  
53  
54  
55  
56  
57  
58  
59  
60

For peer review only

1  
2  
3 **Title: Have restricted working hours reduced junior doctors' experience of fatigue? A**  
4 **focus group and telephone interview study**  
5  
6  
7

8 **Introduction**  
9

10  
11  
12 There is a considerable body of evidence recognising that fatigue has adverse physiological,  
13 psychological and cognitive effects and can lead to deficits in performance and safety.<sup>1</sup>

14  
15 Fatigue in doctors is associated with increases of risks to personal safety at work<sup>2 3</sup> and  
16 outside work,<sup>4 5</sup> and risks to health and well-being.<sup>6-9</sup> There is also evidence of detriments to  
17 performance, for example in cognitive abilities<sup>10 11</sup> and psychomotor skills<sup>12-14</sup> (although  
18 some studies have found no performance effects<sup>15 16</sup>). Fatigue has also been associated  
19 directly with negative consequences for patient safety such as clinical errors and diagnostic  
20 mistakes.<sup>4 5 17-20</sup> This has been a concern in medicine for several years<sup>21</sup> and remains so  
21 today.<sup>22 23</sup> The effects may be compounded by a risk that doctors do not recognise that they  
22 may be subject to adverse effects.<sup>23</sup>  
23  
24  
25  
26  
27  
28  
29  
30  
31  
32

33  
34 Several countries have introduced limits on working hours. For example, in the USA, since  
35 2003, there has been national implementation of an Accreditation Council for Graduate  
36 Medical Education (ACGME) 80-hour resident work week restriction, averaged over four  
37 weeks; however the limit is lower in Europe. The European Working Time Directive (EWTD)  
38 was introduced to limit hours, to address health and safety concerns for all workers arising  
39 from long hours. Each European Union member state implemented the Directive in its own  
40 legislation – the UK as the Working Time Regulations (1998). These Regulations (the WTR)  
41 have applied fully to junior doctors since 2009, with a limit of 48 hours per week, averaged  
42 across a reference period of 26 weeks, alongside specified minimum rest periods. The WTR  
43 are implemented in rotas (work schedules) alongside the New Deal, which specifies a  
44 maximum of 56 hours per week, with a system of banded payments.  
45  
46  
47  
48  
49  
50  
51  
52  
53  
54  
55  
56  
57  
58  
59  
60

1  
2  
3 Positive effects of a reduction in working hours have been found in many studies,<sup>24-26</sup> but not  
4 all.<sup>27 28</sup> The effect varies with the precise implementation of restrictions, with fatigue affected  
5 by work patterns including the number of consecutive days or nights worked, the intervals  
6 between shifts, and the timing of shifts (day/evening/night).<sup>29-31</sup> Short naps may ameliorate  
7 the negative effects of fatigue,<sup>32</sup> and awareness of the benefits of naps and other  
8 recommendations and interventions to limit fatigue associated with rotating shift work may  
9 be needed.<sup>33</sup>

10  
11  
12  
13  
14  
15  
16  
17  
18 Organisational cultures of long or antisocial hours<sup>34</sup> may also be a factor impacting on stress  
19 and fatigue, and trainees have reported being unofficially expected to work extra hours  
20 voluntarily.<sup>35</sup> Furthermore workload pressures and poor work design may increase risks of  
21 negative behaviours among staff.<sup>36</sup> Limits on professional autonomy – the amount of control  
22 doctors have traditionally held over their practice – may also increase doctors' stress and  
23 reduce job satisfaction.<sup>37-39</sup>

24  
25  
26  
27  
28  
29  
30  
31  
32 Consequently, simply restricting the number of work hours may be insufficient to address  
33 issues relating to fatigue and its consequences. With this in mind, the question is raised  
34 whether the WTR will have achieved the aim of improving junior doctors' well-being and  
35 fatigue. To date, there has been little research looking directly at the effects of the WTR as  
36 implemented and experienced in practice. This paper draws on a larger research study  
37 considering perceptions of the effects of the WTR,<sup>40</sup> and focuses specifically on their effects  
38 on trainee doctors' fatigue.

## 39 40 41 42 43 44 45 46 47 48 **Method**

49  
50  
51 The research was reviewed by the Durham University School of Medicine, Pharmacy and  
52 Health Ethics Sub-Committee, and a favourable ethical opinion received.

53  
54  
55  
56 Focus groups and telephone interviews (with participants who were unable to attend a focus  
57 group) were conducted with Foundation Year One (FY1) and Foundation Year Two (FY2)

1  
2  
3 trainees and specialty trainees, sampled purposively from nine deaneries in all four nations  
4 of the UK. The Foundation Programme is a two-year generic training programme undertaken  
5 after completing medical school, and is followed by specialist or general practice training.  
6  
7

8  
9 The WTR apply to all years of training in the same way.  
10

11  
12 The focus group topic guide and interview questions focused on perceptions and experience  
13 of working hours following the WTR and any educational or personal impact. Trainees were  
14 asked about their knowledge of the WTR; their perceptions of their working hours in practice,  
15 including shifts, rotas and compliance; issues concerning educational opportunities;  
16 monitoring of working hours, and any personal effects they experienced. Some specialty  
17 trainees had experience of working before the introduction of the WTR, and were asked  
18 about the change.  
19  
20  
21  
22  
23  
24  
25  
26

27 Recruitment was undertaken following local advice; in some cases through the Deanery, in  
28 others through education centres in individual hospitals. An information sheet about the  
29 study was distributed to trainees via email from the Deaneries or individual Trusts, and  
30 participation was on a voluntary basis. Written consent was taken at the start of focus groups  
31 and verbal consent at the start of telephone interviews, including consent for audio  
32 recording. Recordings were later transcribed. GM and BB conducted the focus groups and  
33 telephone interviews. Focus groups lasted between 60 and 90 minutes, and telephone  
34 interviews between 30 and 45 minutes.  
35  
36  
37  
38  
39  
40  
41  
42  
43  
44

## 45 **Analysis**

46  
47 Data were analysed using a framework approach.<sup>41</sup> An initial stage of familiarisation, to gain  
48 an overall view of the data, involved reading the transcripts and noting the range and depth  
49 in the data collected. Meetings between all four researchers engaged in this process (GM,  
50 BB, MC, JI) enabled discussion of the concepts and themes that emerged from the data. A  
51 thematic framework was subsequently identified by GM and BB. This involved identifying the  
52  
53  
54  
55  
56  
57  
58  
59  
60

key issues, concepts or themes by which the data could be examined and sorted. The construction of the framework drew upon:

- *a priori* issues - those issues that were known or assumed to be pertinent, that guided the study aims and were developed into the topic guide/interview schedule;
- *emergent* issues - those issues that were raised by the respondents (e.g. issues relating to work intensity);
- *analytic* issues - those themes that emerged from patterns and re-occurrences in the data (e.g. professionalism)

The framework was then applied to the data by GM and BB through indexing and charting, and themes and sub-themes were further refined. Finally, a stage of mapping and interpretation involved bringing the key themes within the data set together and pulling together the findings of the analysis as a whole. Table 1 summarises the main *a priori* themes, emergent themes, and analytic themes related to fatigue and illustrates the mapping and interpretation of the themes. The process of analysis helped provide an explanation of why fatigue remains an issue, and of the inter-relatedness of the issues identified.

Data from focus groups and telephone interviews were analysed concurrently and no differences in themes were identified.

Table 1. Development of themes in framework analysis

| A priori themes | Emergent themes | Analytic themes relevant to fatigue |
|-----------------|-----------------|-------------------------------------|
|-----------------|-----------------|-------------------------------------|

1  
2  
3  
4  
5  
6  
7  
8  
9  
10  
11  
12  
13  
14  
15  
16  
17  
18  
19  
20  
21  
22  
23  
24  
25  
26  
27  
28  
29  
30  
31  
32  
33  
34  
35  
36  
37  
38  
39  
40  
41  
42  
43  
44  
45  
46  
47  
48  
49  
50  
51  
52  
53  
54  
55  
56  
57  
58  
59  
60

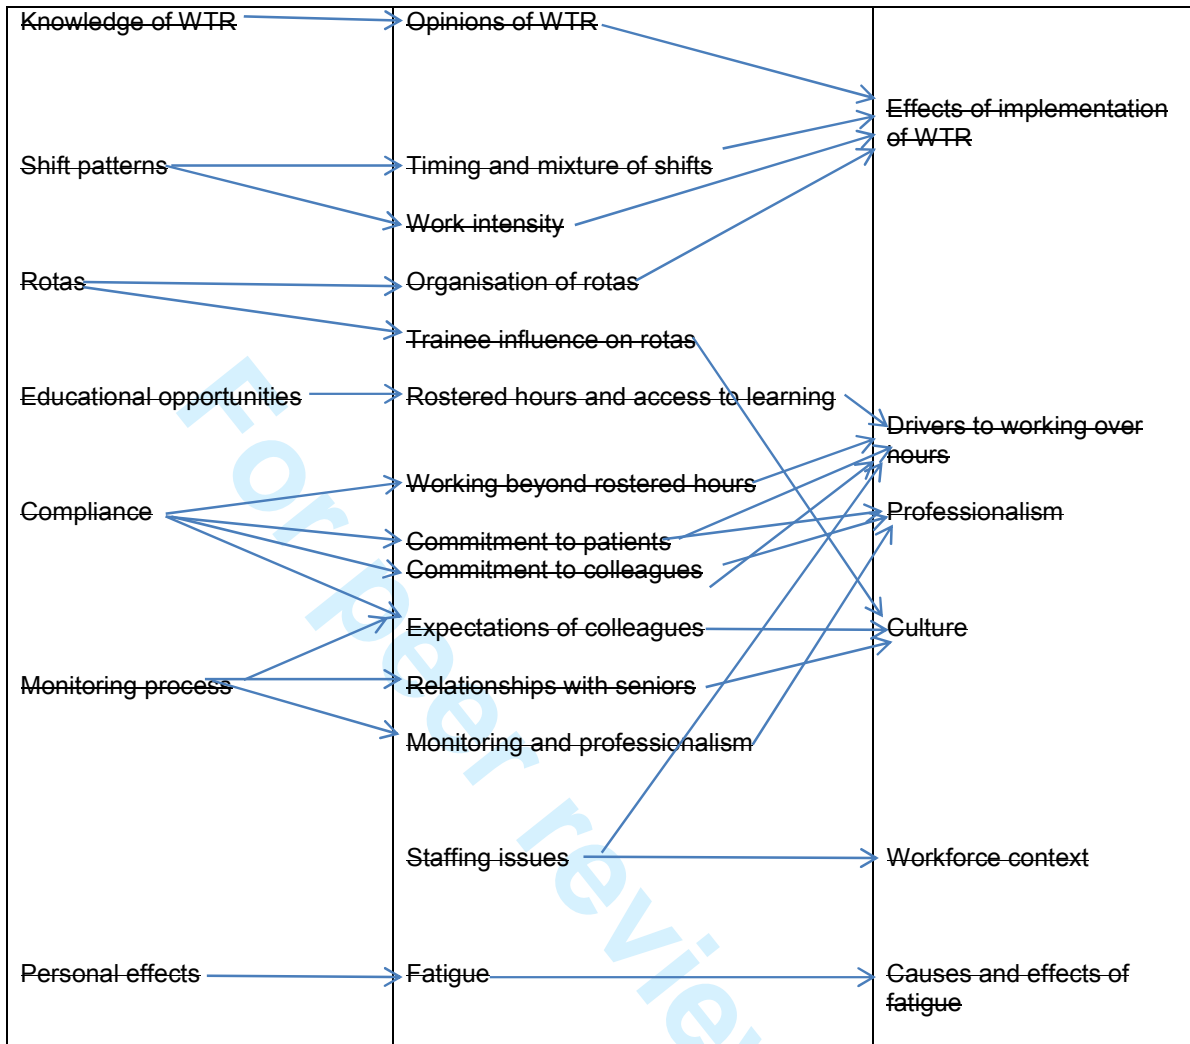

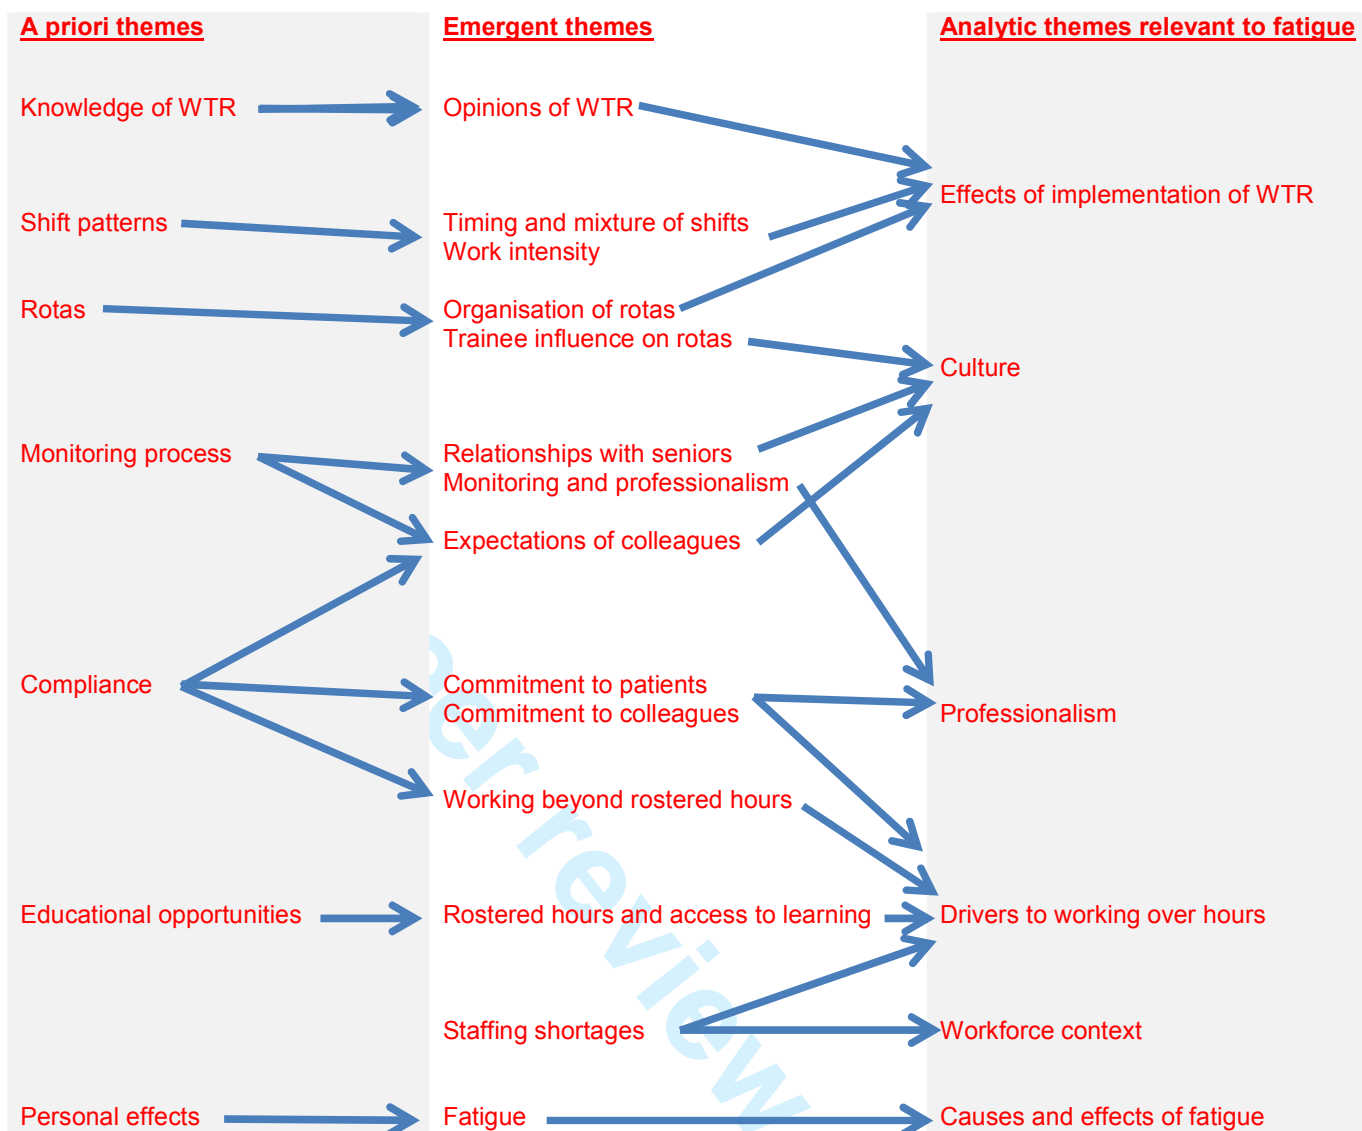

**Findings**

Eleven focus groups and 30 telephone interviews were conducted with 82 junior doctors.

See Table 2 for details of the training grades of participants.

Table 2. Training grades of participants

|                               |                         |                                          |                  |
|-------------------------------|-------------------------|------------------------------------------|------------------|
| Foundation Year 1 (FY1)       | Foundation Year 2 (FY2) | Core or specialty training up to CT/ST3* | ST4 or higher ** |
| 40                            | 13                      | 7                                        | 22               |
| Total Foundation trainees: 53 |                         | Total specialty trainees: 29             |                  |

\* These are trainees in the first three years of their specialty training, and were likely to have started specialty training after the WTR introduction in 2009.

\*\* These are in higher specialty training, in their fourth year or above.

Thirty-six participants were male and 46 were female. Specialty trainee participants were training in a wide range of medical and surgical specialties, and psychiatry.

An overview summary of the findings from the data is presented in Table 3 below.

Table 3. Summary Overview of findings

| Overall findings                                      | Detail of findings                                                                                                                                                                                                                                                                              |
|-------------------------------------------------------|-------------------------------------------------------------------------------------------------------------------------------------------------------------------------------------------------------------------------------------------------------------------------------------------------|
| Perceived effects of WTR on working hours             | General agreement that working hours were much improved under WTR; 48-hour limit appropriate (but desire for greater flexibility); intended benefits achieved to some extent                                                                                                                    |
| Implementation of WTR in practice: effects on fatigue | Different shift systems and patterns of work (timing and adjustment).<br>Long periods without a day off.<br>Averaging over 26 weeks can still allow over 48 working hours in one week.<br>Work compression/work intensity.<br>Rest periods not always taken.                                    |
| Drivers to work long hours                            | Workload/completion of tasks.<br>Taking up educational opportunities at work.<br>Taking work home.<br>Commitment and responsibility to patients and colleagues; collegiality.<br>Cultural expectations.<br>Professional reputation.<br>Views of nature of professionalism.<br>Workforce issues. |
| Effects of fatigue                                    | Detriment to skills and judgement: most felt to affect efficiency rather than safety.<br>Negative effect on ability to retain new information.<br>Mood and manner (compounded by physical discomfort and hunger)                                                                                |



### Perceived effects of WTR on working hours

There was general agreement that working hours were much improved under the WTR, and that intended benefits in terms of reduced trainee fatigue and improved work-life balance had been achieved to some extent. Many trainees felt that the 48-hour limit was appropriate and enabled sufficient training experience, albeit with a perceived lack of flexibility.

*“I think, speaking to people who didn’t have the forty-eight hour working time directive thing, we get a lot more time to go home and enjoy ourselves and be outside the hospital than they ever did and I think that’s a good thing, I feel like I’ve got a bit more of a life.”* (Tel. Int. 22, Foundation)

### Implementation of WTR in practice: effects on fatigue

However, some participants did report still working long hours and experiencing fatigue despite the 48-hour limit and this was found to be related to a number of factors including the way in which the Regulations were implemented and other organisational and contextual factors.

The WTR have not entirely eliminated long hours, with some trainees giving examples of working up to 100 hours in a week. However, fatigue did not necessarily arise just from the long hours worked, but also the organisation of work within those hours, for example the mixture of day and night shifts, and long shifts straddling day and night (e.g. 2.00pm to 2.00am). Rotas could involve five consecutive days at work with 13-hour shifts, and working up to 12 consecutive days or, for some, seven consecutive nights (despite Royal College recommendations to the contrary). Trainees reported that averaging meant that a working week could exceed 70 hours and remain compliant.

*“I don’t think the hours are long, so doing a 12 hour day or 13 hour day is fine, I think doing 12 days in a row you hit delirium about day ten and then you over-ride it...so I*

1  
2  
3 *don't think it's the shift I think it's the number of days you work in a row.*" (Focus  
4  
5 group 3, Foundation)

6  
7  
8 *"There's no continuity in terms of predictability of, right this is what I'm doing and, for*  
9  
10 *example, my rota you run an eight cycle rota so you've got eight weeks to get*  
11  
12 *through and none of those eight weeks are the same at all, and you jump around with*  
13  
14 *longs and lates in-between and I think that from my side is what creates fatigue."*

15  
16 (Focus group 10, Specialty)

17  
18  
19  
20 *"That was a particularly difficult shift on the assessment suite because you would go*  
21  
22 *from five long days with maybe two days off, or a day off sometimes, and then onto a*  
23  
24 *period of nights, you are constantly swapping from nights to days which was tiring,*  
25  
26 *and 12 hour shifts and 13 hour shifts were always a bit of a drag."* (Tel. Int. 22,

27  
28 Foundation)

29  
30  
31 There was also a perception that twelve-hour shifts were more fatiguing, with less 'down-  
32  
33 time' than longer but less intense on-call sessions. Work intensity was also increased by  
34  
35 rotas involving cross-cover out of hours.  
36

37  
38  
39 *"My personal opinion is [the WTR have] actually increased fatigue and stress in the*  
40  
41 *fact that you feel you have to get an increased amount of work done in a shorter*  
42  
43 *amount of time."* (Tel. Int. 16, Foundation)

44  
45  
46 Provision of facilities for taking rest during a night shift was also being reduced which,  
47  
48 alongside less capacity to take breaks or compensatory rest, added to the fatigue  
49  
50 experienced. Rest periods were also lost in half days – sometimes inserted into rotas to  
51  
52 balance hours – not always being taken, sometimes because senior clinical staff were  
53  
54 unaware of them, so workload did not respond to working hours.  
55  
56  
57  
58  
59  
60

1  
2  
3 *“The trouble with night shift is being able to sleep during the day and most hospitals*  
4 *have no facility to actually catch a nap while on nights. The last time I worked in a*  
5 *hospital with bedrooms for on-call staff was in 2007 and that’s despite guidance from*  
6 *the Royal College of Physicians that it should be possible for someone to have a*  
7 *short nap.”* (Tel. Int. 23, Specialty)

8  
9  
10  
11  
12  
13  
14 *“The difficulty is you may be entitled to various half days but the chances of them*  
15 *actually materialising are very slight...unless these things are really formalised and*  
16 *recognised they just don’t happen. I mean you can just about get your half day off*  
17 *before nights because everyone understands that you’re about to start nights...but*  
18 *the rest of them just don’t happen.”* (Tel. Int. 19, Foundation)

### 24 **Drivers to work long hours**

25  
26  
27  
28  
29  
30 Fatigue did not just arise from hours specified in rota design. There were many reasons,  
31 including some voluntary, for trainees working beyond their rostered (scheduled) hours.

32  
33  
34  
35 Some reasons for working longer hours than scheduled stemmed from the capacity to fit  
36 workload into the working period. This was more evident in shift work, where there was a  
37 feeling that incoming doctors in the evening may not have the capacity to perform non-  
38 urgent tasks, so the present doctor would finish those tasks before leaving. In contrast, in  
39 on-call rotas a trainee would simply pass the bleep to the incoming doctor and so have a  
40 cleaner handover.  
41  
42  
43  
44  
45  
46  
47

48  
49 *“You kind of know yourself if I was to leave this work it’s only going to be there for me*  
50 *in the morning and there’s a ward round in the morning, so I will have to get loads*  
51 *more work handed my way. So you want to get things finished.”* (Tel. Int. 2,  
52  
53  
54  
55 Foundation)

1  
2  
3 Other drivers came from missing educational opportunities if trainees did not attend work  
4 outside the rota, including going to work on rostered days off. These opportunities included  
5 attending ward rounds and observing in theatre. While benefits of the WTR for work-life  
6 balance were perceived, there was a sense that some educational activity that had been part  
7 of the 'work' domain was now being taken home. This included portfolio completion and  
8 reading that may have been done in the workplace during slack periods on-call.  
9  
10  
11  
12  
13  
14

15  
16  
17 *"If you haven't got enough time to eat or go to the toilet, you can't leave work on time,*  
18 *then you definitely don't have time to go to clinics, you definitely don't have time to do*  
19 *audits or anything like that during work, it basically means that anything that is*  
20 *exclusively for your own training is basically done in your own time and the amount of*  
21 *time available to you is really diminished."* (Tel. Int. 7, Specialty)  
22  
23  
24  
25  
26  
27

28 Although this increased their working hours and reduced time for rest and recuperation, the  
29 benefit of taking up such opportunities was often seen to outweigh this.  
30  
31  
32

33  
34 *"I've got no problems with the fact that I work a little bit over and take the extra time*  
35 *to get training opportunities and that increases my hours to get better at my job.*  
36 *That's personal sacrifice, personal advancement type stuff to get a better job to*  
37 *become a consultant."* (Focus group 11, Specialty)  
38  
39  
40  
41  
42

43 There were also professional and cultural reasons for working beyond rostered hours. These  
44 related to the expectations and norms perceived among their professional group and the  
45 workplace. Trainee doctors often worked beyond rostered hours due to a sense of  
46 commitment and responsibility, both to patients and to colleagues. There were cases of  
47 trainees staying late to hand over the care of a patient, rather than force two handovers (for  
48 example where a junior doctor would stay to complete an admission in A&E, rather than  
49 hand over to another FY2 doctor, who would then have to hand over to the specialty where  
50 the patient was being admitted), due to concern for continuity of care and the risk of  
51  
52  
53  
54  
55  
56  
57  
58  
59  
60

1  
2  
3 information being lost. There was also a strong sense of collegiality, expressed as a  
4 responsibility not to burden colleagues with routine tasks particularly as they were likely to  
5 face other immediate demands at the handover time.  
6  
7

8  
9  
10 *“We have just never taken the half days because we’re so busy, you know; we could*  
11 *have done, but would have screwed over our colleagues.”* (Focus group 2,  
12 Foundation)  
13  
14

15  
16  
17 At times, however, this could be perceived as a cultural expectation that some jobs would  
18 not be left – so less a choice, more an imposition. There were references to a negative  
19 culture where trainees could experience pressure from senior doctors, and other  
20 professions, to stay beyond their rostered hours, with implication of unprofessionalism if they  
21 left on time. There was also a perception amongst trainees that their professional reputation  
22 was at risk, with implications for an employment reference and future career.  
23  
24  
25  
26  
27  
28  
29

30  
31 Concerns about working hours were often not recognised or appreciated by seniors, with  
32 some respondents identifying a dismissive attitude towards the WTR, and a feeling that such  
33 limitations were counter to medical professionalism. Some trainees also agreed that limited  
34 hours undermined professional autonomy, a feeling exacerbated if hours were enforced  
35 during the periodic two-week monitoring process.  
36  
37  
38  
39  
40  
41

42  
43 *“If you clicked that you started at 8.00 and you were meant to start at 9.00, you had*  
44 *to explain...why did you do it, so quite a lot of the time I wouldn’t put down that I*  
45 *started before 9.00 because I knew I was going to have to justify that I came in*  
46 *before 9.00.”* (Focus group 5, Foundation)  
47  
48  
49  
50  
51

52  
53 Trainees reported that, as WTR compliance is derived from these New Deal monitoring  
54 reports, there was no objective record of hours worked, and there were also no formal  
55 measures for health and well-being. However, few trainees kept their own record of hours  
56  
57  
58  
59  
60

1  
2  
3 worked despite their being conscious of working beyond rostered hours. This was partly due  
4  
5 to their view of medicine and the nature of their work, meaning that working to limited hours  
6  
7 was not an issue to them.  
8  
9

10  
11 *“We are treated usually like we are working late due to our own failings which is not a*  
12 *nice atmosphere to work in, I think it’s very important that you feel you are working,*  
13 *especially as a junior in a new career, you’re working somewhere you are*  
14 *appreciated, valued and not being looked at suspiciously.”* (Tel. Int. 21, Foundation)  
15  
16  
17  
18  
19

20 Gaps in rotas also placed additional pressure on the system, and so on individual doctors.  
21  
22 These arose from staff shortages caused by under-recruitment, as well as absences. This  
23  
24 often meant providing informal cover, for example in extended shifts. While locums were  
25  
26 used, external locums were felt to be sometimes unreliable, meaning last minute cover was  
27  
28 often necessary. Formal internal locum shifts were sometimes used, and cross-referenced  
29  
30 against rotas to ensure an individual did not exceed WTR hours, and there was no reported  
31  
32 pressure to undertake locum shifts. The trainees reported that there was a shortage of  
33  
34 available doctors to fill rotas, even without the need to comply with the WTR. Some trainees  
35  
36 felt that even fully staffed rotas would be stretched because the workload had increased  
37  
38 since the staffing levels were initially put in place.  
39  
40  
41

42 *“The fundamental issue is trying to do a decent job and you can’t do a decent job if*  
43 *there aren’t enough of you on the ground, so you are always working many hours in*  
44 *excess of what you should be doing, you end up tired and exhausted and jaded and*  
45 *then you’re not doing a good job for your patient.”* (Tel. Int. 29, Foundation)  
46  
47  
48  
49  
50

## 51 **Effects of fatigue**

52

53  
54 Trainees identified effects of fatigue arising from their working hours. While detriments to  
55  
56 their skills and judgement were identified, these were mostly felt to affect efficiency rather  
57  
58  
59  
60

1  
2  
3 than safety – however risks to patient safety cannot be discounted. Some reported that  
4  
5 fatigue affected their ability to retain new information.  
6

7  
8 *“I think when you were getting to the end of a thirteen hour shift you found that your*  
9 *technical skills, like your ability to put a cannula into someone and stuff like that, it*  
10 *certainly decreases, I find it gets a lot harder to do things that require more*  
11 *concentration, things like that, but I think you’re also quite aware of that, so patient*  
12 *safety wise you are aware that you are not at your best so you often check more of*  
13 *your decisions with other people and things like that.”* (Tel. Int. 22, Foundation)  
14  
15

16  
17 *“I think 12 days in a stretch is too long without a day off, I just think it’s a really long*  
18 *stretch...I think [the effect] is fatigue really and I suppose you learn less towards the*  
19 *end of those days really because you are just tired.”* (Tel. Int. 26, Foundation)  
20  
21

22  
23  
24  
25  
26  
27  
28 Fatigue was also reported to affect mood, particularly when switching between different  
29  
30 working patterns, with consequences for their professional manner. This may have  
31  
32 consequences for team-working and interprofessional communication, as well as for  
33  
34 interactions with patients.  
35

36  
37 *“You become more irritable sometimes as well, I noticed I was a bit more snappy*  
38 *[when switching between long days and nights]* (Focus group 5, Foundation)  
39  
40

41  
42 *“You don’t make as good decisions and you’re more grumpy, you’re less likely to be*  
43 *good with the patients, you know, you’re more likely to just go in there and take the*  
44 *blood rather than actually you know being a doctor to them...so you have to be a lot*  
45 *more careful when you’re tired I suppose.”* (Tel. Int. 9, Foundation)  
46  
47  
48  
49

50  
51  
52 These issues were sometimes compounded by hunger and discomfort arising from not  
53  
54 achieving rest breaks during long shifts.  
55

1  
2  
3 *"I think when I'm hungry my fuse is shorter and I think my compassion towards others*  
4 *is not as what it should be."* (Tel. Int. 2, Foundation)  
5  
6  
7

8 A summary of the Findings is presented in Table 3 below.  
9

10  
11  
12 **Table 3. Summary of findings**

| Overall findings                                      | Detail of findings                                                                                                                                                                                                                                                                              |
|-------------------------------------------------------|-------------------------------------------------------------------------------------------------------------------------------------------------------------------------------------------------------------------------------------------------------------------------------------------------|
| Perceived effects of WTR on working hours             | General agreement that working hours were much improved under WTR; 48 hour limit appropriate (but desire for greater flexibility); intended benefits achieved to some extent                                                                                                                    |
| Implementation of WTR in practice: effects on fatigue | Different shift systems and patterns of work (timing and adjustment).<br>Long periods without a day off.<br>Averaging over 26 weeks can still allow over 48 working hours in one week.<br>Work compression/work intensity.<br>Rest periods not always taken.                                    |
| Drivers to work long hours                            | Workload/completion of tasks.<br>Taking up educational opportunities at work.<br>Taking work home.<br>Commitment and responsibility to patients and colleagues; collegiality.<br>Cultural expectations.<br>Professional reputation.<br>Views of nature of professionalism.<br>Workforce issues. |
| Effects of fatigue                                    | Detriment to skills and judgement: most felt to affect efficiency rather than safety.<br>Negative effect on ability to retain new information.<br>Mood and manner (compounded by physical discomfort and hunger)                                                                                |

13  
14  
15  
16  
17  
18  
19  
20  
21  
22  
23  
24  
25  
26  
27  
28  
29  
30  
31  
32  
33  
34  
35  
36  
37  
38  
39 **Discussion**

40  
41 Despite the introduction of restricted working hours for junior doctors in the UK, long hours  
42 and fatigue remain, with associated consequences for performance. There was general  
43 agreement that restricting working hours was a positive thing, but that problems remained  
44 with acute workload in some working patterns. Conversely, while most felt that a 48 hour  
45 limit was appropriate, some would like more flexibility to exceed it when necessary.  
46  
47  
48  
49  
50

51  
52  
53 It was considered that the amount of work to be carried out had not reduced, increasing the  
54 perceived intensity of work. Some working patterns were considered particularly intense and  
55 detrimental to personal well-being – with consequences for performance and education.  
56  
57  
58  
59  
60



1  
2  
3 Long periods without a day off in particular were tiring. There is no objective record of hours  
4 worked, as WTR compliance is derived from New Deal monitoring reports, and trainees  
5 reported no formal measures for health and well-being.  
6  
7  
8

9  
10 There was evidence that the design of rotas was not the only factor working against well-  
11 being. Trainees were often working beyond their rostered hours for voluntary reasons of  
12 workload, perceived need to gain educational opportunities, and collegiality, but also for  
13 more external reasons such as the expectations of others and gaps in the rota. Notably  
14 these are corollaries of the voluntary reasons – rota gaps increase workload, and adverse  
15 cultures may define professional practice. Contrary to recent recommendations that ‘every  
16 moment count’ towards education in the workplace,<sup>42</sup> for some trainees at least there is  
17 increasing separation between work and education, and an increase in work intensity that  
18 may be adding new stresses to the trainee population.  
19  
20  
21  
22  
23  
24  
25  
26  
27  
28

29  
30 The current study provides evidence that three years after the implementation of the WTR,  
31 and with rotas that are at least compliant on paper, fatigue remains an issue for doctors in  
32 training. This reflects some findings in the literature that a reduction in working hours alone is  
33 not enough. The issue of increased work intensity and greater stress was noted amongst US  
34 residents when working hours were further restricted.<sup>43</sup> Performing the same amount of work  
35 in fewer hours (work compression) is of concern regarding workload<sup>44</sup> and overall well-  
36 being,<sup>45</sup> and may place trainee doctors at risk of burnout.<sup>46</sup> Although much of the literature  
37 relating to fatigue comes from the USA where restricted working hours are still much longer  
38 than in Europe (e.g. >24 hour shifts until 2011, or 80-hour weeks), two UK self-report studies  
39 conducted shortly after implementation of the 48-hour working week have highlighted the  
40 effect of different schedules on fatigue, including the negative effect of working seven  
41 consecutive nights, having only one day of rest after night shifts, intervals of less than ten  
42 hours between shifts, and shifts of twelve consecutive days.<sup>30 31</sup> Difficulty achieving naps  
43 during night shifts, and poor provision for naps, has been reported elsewhere.<sup>33</sup> The current  
44  
45  
46  
47  
48  
49  
50  
51  
52  
53  
54  
55  
56  
57  
58  
59  
60

1  
2  
3 study has identified that fatigue is related to a number of complex issues, including rota  
4 design, but also including contextual issues such as staff shortages and rota gaps, and  
5 broader professional and cultural issues.  
6  
7

8  
9  
10 Cultural issues within healthcare have been found to include fatigue not being taken  
11 seriously, lack of discussion of fatigue issues and lack of support for napping.<sup>47</sup> The culture  
12 of medicine needs to value sleep and appropriate work schedules.<sup>48</sup> Long working hours  
13 may be a symptom of, and contribute to, an adverse culture. Expectations of long hours,  
14 coupled with a lack of their explicit recognition, may be symptomatic of 'institutionalised  
15 disrespect' of workers,<sup>34</sup> which if it is felt to be normal may lead to further dysfunctional  
16 behaviours. Culture, particularly at the level of basic underlying assumptions that may  
17 underpin day-to-day work, can be extremely difficult to change.<sup>34 49</sup> In a study of paramedics,  
18 podiatrists and occupational therapists, the working environment was found to be an  
19 important factor in encouraging and developing professionalism.<sup>44-50</sup> Some trainees in the  
20 current study felt undermined by aspects of the professional and organisational culture and  
21 felt there was a lack of recognition of the extra hours they worked. **This was compounded by  
22 pressure from seniors to work and record compliant hours during monitoring periods, even if  
23 that was unrepresentative of the usual functioning of the rota. This highlights tensions that  
24 can be experienced by trainee doctors who are required to work in compliance with the WTR  
25 but also meet the demands of the healthcare service and the needs of patients, and  
26 simultaneously want to satisfy their own professional standards and maximise their  
27 educational opportunities.**  
28  
29  
30  
31  
32  
33  
34  
35  
36  
37  
38  
39  
40  
41  
42  
43  
44  
45  
46  
47

48 In other professions and industries the organisation of work, and the professional and  
49 organisational cultures they engender or reinforce (such as a culture of long working hours;  
50 cultural attitudes towards napping), has also been linked to fatigue, performance, safety,  
51 health and well-being. Such professions and industries include nursing,<sup>51</sup> aviation,<sup>52</sup> the  
52 police,<sup>53</sup> truck driving,<sup>54</sup> the shipping industry<sup>55</sup> and the construction industry.<sup>56</sup> It has also  
53  
54  
55  
56  
57  
58  
59  
60

1  
2  
3 been found, in a study of metropolitan train drivers, that the successful adoption of fatigue  
4 management strategies can be positively or negatively affected by aspects of the  
5 organisational culture, such as altruism and camaraderie.<sup>57</sup> A culture of denial of vulnerability  
6 to stress and the effects of fatigue on performance has been identified in both aviation and  
7 medicine,<sup>58</sup> although one study found this to a lesser extent in aviation.<sup>59</sup>  
8  
9  
10  
11  
12  
13

14 Work hours are closely related to psychosocial work characteristics such as work demands  
15 and autonomy.<sup>60</sup> Optimal amount and quality of workload, and opportunities for control at  
16 work are among the psychosocial criteria identified for a good work environment and good  
17 work organisation, and typically show dependence on national and organisational culture  
18 and values,<sup>61</sup> however individual differences in the desire or need for control need to be  
19 taken into account.<sup>62</sup> High work demands and work intensity, and lack of autonomy (and  
20 particularly a combination of these) have been associated with health problems.<sup>63</sup> In a study  
21 of US nurses, high job demands were associated with greater fatigue when job control was  
22 low.<sup>64</sup> Ability to influence working hours (worktime control) has been associated with fewer  
23 subjective health complaints,<sup>65</sup> and with decreased work strain and decreased perceived  
24 stress.<sup>66</sup>  
25  
26  
27  
28  
29  
30  
31  
32  
33  
34  
35  
36  
37

38 The broader cultural issues identified in relation to trainees' professional autonomy and the  
39 relationship between trainees and their seniors are of current relevance in light of the Francis  
40 report's recommendations for fundamental culture change in the NHS.<sup>67</sup> Following these  
41 recommendations, it has been argued that more sophisticated understandings of cultural  
42 dynamics and the role of policy in shaping these may be needed.<sup>68</sup> Fatigue may be an  
43 important mediating variable in the perpetuation of adverse cultures and practice failings,  
44 and as such should be an important component of any policies to monitor and improve  
45 workplace cultures.  
46  
47  
48  
49  
50  
51  
52  
53

54  
55 Evaluation of the WTR must be considered in relation to the historical context within which  
56 they were implemented. Perceptions of the WTR were not isolated from other changes  
57  
58  
59  
60

1  
2  
3 affecting working hours, particularly the 1991 New Deal for Junior Doctors, which imposed  
4 restrictions for the first time. At an organisational level, changes relating to the reorganisation  
5 of specialty training over the last 20 years<sup>69</sup> affected the working environment. Trainees now  
6 have to settle on a career specialty training path sooner, meaning that the Senior House  
7 Officer (SHO) posts they would have filled in other specialties for up to several years may  
8 remain unfilled. These gaps are compounded by the reduction in the number of overseas-  
9 qualified doctors entering the UK following changes to immigration policy in 2008. The  
10 workload and hence fatigue experienced by individual trainees can therefore be seen as the  
11 end-point of many contributory factors.  
12  
13  
14  
15  
16  
17  
18  
19  
20

### 21 **Strengths and limitations**

22  
23  
24 The strength of the current study is the breadth of trainee participants, covering a range of  
25 training grades and specialties and all four nations of the UK, so gaining a picture across the  
26 trainee experience. A weakness is that the trainee participants were volunteers to the study,  
27 and as such may be open to self-selection bias. However, this risk is mitigated by the  
28 instance of one group, run as part of Foundation Programme teaching, where all but four of  
29 a cohort of F1s were able to attend. That group identified the same issues as the wider  
30 sample, suggesting the prevalence of the concerns identified is not limited to a particularly  
31 engaged sample. There may also be some instances of inaccuracy in individual recall  
32 regarding the exact hours trainees worked.  
33  
34  
35  
36  
37  
38  
39  
40  
41  
42  
43

### 44 **Conclusion**

45  
46 The WTR have reduced the hours junior doctors work, but have not fully addressed  
47 problems of fatigue and stress, due to issues in their implementation and other contextual  
48 factors. The long term risks of this continued stress and fatigue, for the doctors themselves  
49 and for the effective delivery of a healthcare service, should not be ignored.  
50  
51  
52  
53  
54  
55  
56  
57  
58  
59  
60

1  
2  
3 Future research could usefully involve an investigation of work intensity and its effects on  
4 doctors' education, performance and well-being, and its impact on patient care. Such  
5 research should consider the clinical demands of different specialties and the working  
6 environment. Policy and practice could consider how best to monitor both working hours and  
7 doctors' well-being. The closer and more effective involvement of trainees in rota design,  
8 with consideration of the physiological aspects of sleep and fatigue, may help to avoid some  
9 stresses, but there may need to be more fundamental consideration of necessary staffing  
10 levels.  
11  
12  
13  
14  
15  
16  
17  
18  
19

### 20 **Acknowledgements**

21  
22  
23  
24 This research was funded by the General Medical Council. The authors also thank all the  
25 trainee doctors who took part in focus groups or telephone interviews.  
26  
27  
28

### 29 **Contributors and sources:**

30  
31  
32  
33 This article draws on research commissioned by the UK General Medical Council, designed  
34 by GM and BB, and conducted by all authors. All four authors were members of the Centre  
35 for Medical Education Research, Durham University, UK, when this research was carried  
36 out. All authors contributed to the analysis and writing of the report and the writing of this  
37 article, and approved the final version. GM is guarantor of the article.  
38  
39  
40  
41  
42  
43  
44

45 **Competing interests:** We have read and understood the BMJ Group policy on declaration  
46 of interests and have no relevant interests to declare.  
47  
48

49 **Licence:** The Corresponding Author has the right to grant on behalf of all authors and does  
50 grant on behalf of all authors, an exclusive licence on a worldwide basis to the BMJ  
51 Publishing Group Ltd, and its Licensees, to permit this article (if accepted) to be published in  
52 *BMJ Open* and any other BMJ PGL products and to exploit all subsidiary rights, as set out in  
53 our licence.  
54  
55  
56  
57  
58  
59  
60

## References

1. Morrow G, Burford B, Carter M, *et al.* *The Impact of the Working Time Regulations on medical education and training: Literature review.* Report to the GMC, August 2012.  
[http://www.gmc-uk.org/The\\_Impact\\_of\\_the\\_Working\\_Time\\_Regulations\\_on\\_Medical\\_Education\\_and\\_Training\\_Literature\\_Review.pdf](http://www.gmc-uk.org/The_Impact_of_the_Working_Time_Regulations_on_Medical_Education_and_Training_Literature_Review.pdf) 51155615.pdf
2. Ayas NT, Barger LK, Cade BE, *et al.* Extended work duration and the risk of self-reported percutaneous injuries in interns. *JAMA* 2006;296:1055-62.
3. Fisman DN, Harris AD, Rubin M, *et al.* Fatigue increases the risk of injury from sharp devices in medical trainees: results from a case-crossover study. *Infect Cont Hosp Ep* 2007;28:10-17.
4. Barger LK, Ayas NT, Cade BE, *et al.* Impact of extended-duration shifts on medical errors, adverse events, and attentional failures. *PLOS Med* 2006;3:e487.
5. Gander P, Purnell H, Garden A, *et al.* Work patterns and fatigue-related risk among junior doctors. *Occup Environ Med* 2007;64:733-738.
6. Kohen-Raz R, Himmelfarb M, Tzur S, *et al.* An initial evaluation of work fatigue and circadian changes as assessed by multiplate posturography. *Percept Motor Skill* 1996;82:547-557.
7. Parshuram CS, Dhanani S, Kirsh JA, *et al.* Fellowship training, workload, fatigue and physical stress: A prospective observational study. *Can Med Assoc J* 2004;170:965-970.
8. Smith AM, Morris P, Rowell KO, *et al.* Junior doctors and the full shift rota - psychological and hormonal changes: a comparative cross-sectional study. *Clin Med* 2006;6:174-177.
9. Block L, Wu AW, Feldman L, *et al.* Residency schedule, burnout and patient care among first-year residents. *Postgrad Med J* 2013;89:495-500.
10. Gohar A, Adams A, Gertner E, *et al.* Working memory capacity is decreased in sleep-deprived internal medicine residents. *J Clin Sleep Med* 2009;5:191-197.

- 1  
2  
3 11. Lockley SW, Cronin JW, Evans EE, *et al.* Effect of reducing interns' weekly work hours  
4 on sleep and attentional failures. *New Engl J Med* 2004;351:1829-1837.
- 5  
6  
7 12. Jakubowicz DM, Price EM, Glassman HJ, *et al.* Effects of a twenty-four hour call period  
8 on resident performance during simulated endoscopic sinus surgery in an Accreditation  
9 Council for Graduate Medical Education-compliant training program. *Laryngoscope*  
10 2005;115:143-146.
- 11  
12  
13 13. Gander P, Millar M, Webster C, *et al.* Sleep loss and performance of anaesthesia  
14 trainees and specialists. *Chronobiol Int* 2008; 25;1077-1091.
- 15  
16  
17 14. Brandenberger J, Kahol K, Feinstein AJ, *et al.* Effects of duty hours and time of day on  
18 surgery resident proficiency. *Am J Surg* 2010;200:814-818.
- 19  
20  
21 15. Ellman PI, Law MG, Tache-Leon C, *et al.* Sleep deprivation does not affect operative  
22 results in cardiac surgery. *AnnThorac Surg* 2004;78:906-911.
- 23  
24  
25 16. Lehmann KS, Martus P, Little-Elk S, *et al.* Impact of sleep deprivation on medium-term  
26 psychomotor and cognitive performance of surgeons: prospective cross-over study with  
27 a virtual surgery simulator and psychometric tests. *Surgery* 2010;147:246-254.
- 28  
29  
30 17. Grantcharov TP, Bardram L, Funch-Jensen P, *et al.* Laparoscopic performance after one  
31 night on call in a surgical department: prospective study. *Brit Med J* 2001;323:1222-3.
- 32  
33  
34 18. Landrigan CP, Rothschild JM, Cronin JW, *et al.* Effects of reducing interns' work hours  
35 on serious medical errors in intensive care units. *New Engl J Med* 2004;351:1838-1848.
- 36  
37  
38 19. Lockley SW, Landrigan CP, Barger LK, *et al.* Harvard Work Hours, Health Safety Group.  
39 When policy meets physiology: the challenge of reducing resident work hours. *Clin*  
40 *Orthop Relat R* 2006;449:16-127.
- 41  
42  
43 20. Majekodunmi A, Landrigan CP. The effect of physician sleep deprivation on patient  
44 safety in perinatal-neonatal medicine. *Am J Perinat* 2012;29:43-48.
- 45  
46  
47 21. Vorona RD, Chen IA, Ware JC. Physicians and sleep deprivation. *Sleep Medicine Clinics*  
48 2009;4:527-540.
- 49  
50  
51 22. Paice E, Hamilton-Fairley D. Avoiding burnout in new doctors: sleep, supervision and  
52 teams. *Postgrad Med J* 2013;89:493.
- 53  
54  
55  
56  
57  
58  
59  
60



- 1  
2  
3 23. Sokol DK. Waking up to the effects of fatigue in doctors. *Brit Med J* 2013;347:f4906.  
4  
5 24. Conigliaro J, Frishman WH, Lazar EJ, *et al.* Internal medicine housestaff and attending  
6  
7 physician perceptions of the impact of the New York State Section 405 regulations on  
8  
9 working conditions and supervision of residents in two training programs. *J Gen Intern*  
10  
11 *Med* 1993; 8:502-507.  
12  
13 25. Kort KC, Pavone LA, Jensen E, *et al.* Resident perceptions of the impact of work-hour  
14  
15 restrictions on health care delivery and surgical education: time for transformational  
16  
17 change. *Surgery* 2004;136:861-871.  
18  
19 26. Kiernan M, Civetta J, Bartus C, *et al.* 24 hours on-call and acute fatigue no longer  
20  
21 worsen resident mood under the 80-hour work week regulations. *Curr Surg* 2006;63:237-  
22  
23 241.  
24  
25 27. Cull WL, Mulvey HJ, Jewett EA, *et al.* Pediatric residency duty hours before and after  
26  
27 limitations. *Pediatrics* 2006;118:e1805-1811.  
28  
29 28. Reddy R, Guntupalli K, Alapat P, *et al.* Sleepiness in medical ICU residents. *Chest*  
30  
31 2009;135:81-85.  
32  
33 29. Berios I, Surani S, Simmons M. Assessing reaction time among emergency medicine  
34  
35 residents working different shift hours. *Ann Emerg Med* 2009; 54: S35.  
36  
37 30. Brown M, Tucker P, Rapport F, *et al.* The impact of shift patterns on junior doctors'  
38  
39 perceptions of fatigue, training, work/life balance and the role of social support. *Qual Saf*  
40  
41 *Health Care* 2010;19:e36.  
42  
43 31. Tucker P, Brown M, Dahlgren A, *et al.* The impact of junior doctors' worktime  
44  
45 arrangements on their fatigue and well-being. *Scand J Work Env Hea* 2010;36:458-46.  
46  
47 32. Arora V, Dunphy C, Chang VY, *et al.* The effects of on-duty napping on intern sleep time  
48  
49 and fatigue. *Ann Intern Med* 2006;144:792-798.  
50  
51 33. Jackson EJ, Moreton A. Safety during night shifts: a cross-sectional survey of junior  
52  
53 doctors' preparation and practice. *BMJ Open* 2013 3: doi: 10.1136/bmjopen-2013-  
54  
55 003567.  
56  
57  
58  
59  
60



- 1  
2  
3 34. Leape LL, Shore MF, Dienstag JL, *et al.* A culture of disrespect, Part 1: The nature and  
4 causes of disrespectful behavior by physicians. *Acad Med* 2012;87:845-852.  
5  
6  
7 35. O'Gallagher MK, Lewis G, Mercieca K, *et al.* The impact of the European Working Time  
8 Regulations on Ophthalmic Specialist Training - A national trainee survey. *Int J Surg*  
9 2013: <http://dx.doi.org/10.1016/j.ijisu.2013.08.007>  
10  
11  
12  
13 36. Illing JC, Carter M, Thompson NJ, *et al.* *Evidence synthesis on the occurrence, causes,*  
14 *consequences, prevention and management of bullying and harassing behaviours to*  
15 *inform decision making in the NHS. Final report.* NIHR Service Delivery and Organisation  
16 programme; 2013.  
17  
18  
19  
20  
21 37. Williams ES, Konrad TR, Scheckler WE, *et al.* Understanding physicians' intentions to  
22 withdraw from practice: the role of job satisfaction, job stress, mental and physical  
23 health. *AHCM* 2001;2:243-262.  
24  
25  
26  
27 38. Edwards N, Kornacki MJ, Silversin J. Unhappy doctors: what are the causes and what  
28 can be done? *Brit Med J* 2002;324:835-8.  
29  
30  
31 39. Visser MRM, Smets EMA, Oort FJ, *et al.* Stress, satisfaction and burnout among Dutch  
32 medical specialists. *CMAJ* 2003;168:271-5.  
33  
34  
35 40. Morrow G, Burford B, Carter M, *et al.* *The Impact of the Working Time Regulations on*  
36 *medical education and training: Final report on primary research.* Report to the GMC,  
37 August 2012. [http://www.gmc-](http://www.gmc-uk.org/The_Impact_of_the_Working_Time_Regulations_on_Medical_Education_and_Training_Final_Report_on_Primary_Research.pdf)  
38 [uk.org/The\\_Impact\\_of\\_the\\_Working\\_Time\\_Regulations\\_on\\_Medical\\_Education\\_and\\_Tr](http://www.gmc-uk.org/The_Impact_of_the_Working_Time_Regulations_on_Medical_Education_and_Training_Final_Report_on_Primary_Research.pdf)  
39 [aining\\_Final\\_Report\\_on\\_Primary\\_Research.pdf](http://www.gmc-uk.org/The_Impact_of_the_Working_Time_Regulations_on_Medical_Education_and_Training_Final_Report_on_Primary_Research.pdf) 51157039.pdf  
40  
41  
42  
43  
44  
45 41. Ritchie J, Spencer L. Qualitative data analysis for applied policy research. In: Bryman A,  
46 Burgess RG, editors. *Analysing Qualitative Data.* London: Routledge; 1994. p.173-194.  
47  
48  
49 42. Temple J. Time for Training: A review of the impact of the European Working Time  
50 Directive on the quality of training. 2010.  
51  
52  
53  
54 [http://www.mee.nhs.uk/pdf/JCEWTD\\_Final%20report.pdf](http://www.mee.nhs.uk/pdf/JCEWTD_Final%20report.pdf)  
55  
56  
57  
58  
59  
60

- 1  
2  
3 43. Auger KA, Sieplinga KR, Simmons JM, *et al.* Failure to thrive: Pediatric residents weigh  
4 in on feasibility trial of the proposed 2008 Institute of Medicine work hour restrictions. *J*  
5 *Grad Med Educ* 2009;1:181-184.  
6  
7  
8  
9 44. Goitein L. Resident workload – Let’s treat the disease, not just the symptom. *JAMA*  
10 *Intern Med* 2013;173:655-656.  
11  
12  
13 45. Auger KA, Landrigan CP, Gonzalez del Ray JA, *et al.* Better rested but more stressed?  
14 Evidence of the effects of resident work hour restrictions. *Acad Pediatr* 2012;12:335-343.  
15  
16  
17 46. Wayne DB, Arora V. Resident duty hours and the delicate balance between education  
18 and patient care. *J Gen Intern Med* 2008;23:1120-1121.  
19  
20  
21 47. Ferguson SA, Neall A, Dorrian J. Strategies used by healthcare practitioners to manage  
22 fatigue-related risk: beyond work hours. *Medical Sociology online* 2013;7:24-33.  
23  
24 <http://www.medsoconline.org/>  
25  
26  
27 48. Buysse DJ, Barzansky B, Dinges D, *et al.* Sleep, fatigue, and medical training: setting an  
28 agenda for optimal learning and patient care. A report from the Conference “Sleep,  
29 fatigue and medical training: Optimizing learning and the patient care environment”.  
30  
31 *Sleep* 2003;2:218-225.  
32  
33  
34  
35 49. Schein EH. Organisational culture and leadership. 4<sup>th</sup> edn. Jossey-Bass, 2010.  
36  
37 50. Morrow G, Burford B, Rothwell C, *et al.* *Professionalism in healthcare professionals.*  
38 *Perceptions of professionalism.* Final report to the hpc, 2011. [http://www.hpc-](http://www.hpc-uk.org/assets/documents/10003771Professionalisminhealthcareprofessionals.pdf)  
39 [uk.org/assets/documents/10003771Professionalisminhealthcareprofessionals.pdf](http://www.hpc-uk.org/assets/documents/10003771Professionalisminhealthcareprofessionals.pdf)  
40  
41  
42  
43 51. Rogers AE. The effects of fatigue and sleepiness on nurse performance and patient  
44 safety. In: Hughes RG. editor. Patient safety and quality: An evidence-based handbook  
45 for nurses. Rockville (MD): Agency for Healthcare Research and Quality (US); 2008.p2-  
46 509-2-533.  
47  
48  
49  
50  
51 52. Gregory KB, Winn W, Johnson K, *et al.* Pilot fatigue survey: Exploring fatigue factors in  
52 air medical operations. *Air Med J* 2010;29:309-319.  
53  
54  
55  
56 53. Vila B. Impact of long work hours on police officers and the communities they serve. *Am*  
57 *J Ind Med* 2006;49:972-980.  
58  
59  
60

- 1  
2  
3 54. Sabbagh-Ehrlich S, Friedman L, Richter E. Working conditions and fatigue in  
4 professional truck drivers at Israeli ports. *Inj Prev* 2005;11:110-114.  
5  
6  
7 55. Xhelilaj E, Lapa K. The role of human fatigue factor towards maritime casualties.  
8  
9 *Maritime Transport & Navigation Journal* 2010;2:23-32.  
10  
11 56. Dong X. Long workhours, work scheduling and work-related injuries among construction  
12 workers in the United States. *Scand J Work Environ Health* 2005;31:329-335.  
13  
14  
15 57. Rainbird S, Thompson K, Dawson D. The impact of organisational culture on fatigue  
16 management: The case of camaraderie amongst metropolitan train drivers. In: Sargent  
17 C, Darwent D, Roach GD. editors. Living in a 24/7 world: The impact of circadian  
18 disruption on sleep, work and health. Adelaide: Australasian Chronobiology Society;  
19 2010.p.29-33.  
20  
21  
22 58. Helmreich RL. On error management: lessons from aviation. *Brit Med J* 2000;320:781-  
23 785.  
24  
25  
26 59. Sexton JB, Thomas EJ, Helmreich RL. Error, stress and teamwork in medicine and  
27 aviation: cross sectional surveys. *Brit Med J* 2000;320:745-749.  
28  
29  
30 60. Härmä M. Workhours in relation to work stress, recovery and health. *Scand J Work*  
31 *Environ Health* 2006;32:502-514.  
32  
33  
34 61. Lindström K. Psychosocial criteria for good work organization. *Scand J Work Environ*  
35 *Health* 1994;20:123-133.  
36  
37  
38 62. Sparks K, Faragher B, Cooper CL. Well-being and occupational health in the 21st  
39 century workplace. *J Occup Organ Psych* 2001;74:489-509.  
40  
41  
42 63. Eurofound. Fifth European working conditions survey. Publications Office of the  
43 European Union, Luxembourg, 2012.  
44  
45  
46 <http://www.eurofound.europa.eu/pubdocs/2011/82/en/1/EF1182EN.pdf>  
47  
48  
49  
50 64. Van Yperen NW, Hagedoorn M. Do high job demands increase intrinsic motivation or  
51 fatigue or both? The role of job control and job social support. *Acad Manage J*  
52 2003;46:339-348.  
53  
54  
55  
56  
57  
58  
59  
60

- 1  
2  
3 65. Costa G, Akerstedt T, Nachreiner F, *et al*. Flexible working hours, health, and well-being  
4 in Europe: some considerations from a SALTSA project. *Chronobiol Int* 2004;21:831-  
5 844.  
6  
7  
8  
9 66. Kandolin I, Huida O. Individual flexibility: an essential pre-requisite in arranging shift  
10 schedules for midwives. *J Nurs Manag* 1996;4:213-217.  
11  
12  
13 67. Francis R. *Report of the Mid Staffordshire NHS Foundation Trust public inquiry*.  
14 Stationery Office, 2013.  
15  
16  
17 68. Davies H, Mannion R. Will prescriptions for cultural change improve the NHS? *Brit Med J*  
18 2013;346:f1305.  
19  
20  
21 69. HMSO. Hospital Doctors: Training for the future. The report of the working group on  
22 specialist medical training. HMSO, 1993.  
23  
24  
25  
26  
27  
28  
29  
30  
31  
32  
33  
34  
35  
36  
37  
38  
39  
40  
41  
42  
43  
44  
45  
46  
47  
48  
49  
50  
51  
52  
53  
54  
55  
56  
57  
58  
59  
60
